# Supplementary material for: Nutritional Value and Energetic Properties of Caimito (Chrysophyllum cainito L.) from Southern Nariño, Colombia
Source: Research Square preprint supplement (doi:10.21203/rs.3.rs-6598247/v1), 2025-05-13
Supplement: Supplementary file 1 [file 058ae7ed3858718bbc2944fb.xlsx]

## Sheet: Production
Year	Department	Planted regional area (ha)	Regional production (ton)	Yield (ha/ton)	National production (ton)	Planted national area (ha)
2019	AMAZONAS	55.00	82.50	1.50	80.49	93.22
2019	NARIÑO	4.00	20.00	5.00	19.51	6.78
2020	AMAZONAS	47.00	94.00	2.00	78.99	90.38
2020	NARIÑO	5.00	25.00	5.00	21.01	9.62
2021	AMAZONAS	40.00	96.00	2.40	79.34	88.89
2021	NARIÑO	5.00	25.00	5.00	20.66	11.11
2022	AMAZONAS	42.00	100.80	2.40	77.06	87.50
2022	NARIÑO	6.00	30.00	5.00	22.94	12.5

## Sheet: Protein in silico
ID	Name	Function	UniProt	Link	Short	#aa	FASTA	Enzyme	Cutting position	Total	Peptides
1	Ribulose bisphosphate carboxylase large chain	Catalysis	A0A7U3NIR1	https://www.uniprot.org/uniprotkb/A0A7U3NIR1/entry	RuBisCO large subunit	475	MSPQTETKASVGFKAGVKDYKLTYYTPDYETKDTDILAAFRVTPQPGVPPEEAGAAVAAESSTGTWTTVWTDGLTSLDRYKGRCYHIEPVAGEENQYIAYVAYPLDLFEEGSVTNMFTSIVGNVFGFKALRALRLEDLRIPPAYSKTFQGPPHGIQVERDKLNKYGRPLLGCTIKPKLGLSAKNYGRAVYECLRGGLDFTKDDENVNSQPFMRWRDRFVFCAEALYKAQAETGEIKGHYLNATAGTCEEMIKRAVFARELGVPIVMHDYLTGGFTANTSLAHYCRDNGLLLHIHRAMHAVIDRQKNHGMHFRVLAKALRLSGGDHIHAGTVVGKLEGEREITLGFVDLLRDDYVEKDRSRGIYFTQDWVSLPGVLPVASGGIHVWHMPALTEIFGDDSV…	Trypsin	1 8 14 18 21 32 41 79 81 83 128 131 134 139 146 159 161 164 177 183 187 194 201 213 215 217 227 236 252 253 258 285 295 303 305 312 316 319 334 339 350 356 358 360 421 431 435 439 446 450 463 466	51	1326
								Pepsin	1 12 13 19 21 22 24 29 36 37 39 40 65 66 69 70 73 74 76 77 80 84 96 97 99 100 103 104 106 107 108 116 117 124 125 126 127 129 132 135 137 138 144 147 162 164 165 168 170 178 180 184 190 192 193 197 198 199 210 214 218 220 224 225 226 239 256 259 268 270 273 274 279 280 282 283 288 289 290 291 310 311 313 317 320 334 335 342 343 344 345 347 348 349 353 363 364 367 368 371 375 384 390 393 394 399 4…	122	7503
2	ATP-dependent Clp protease proteolytic subunit	Hydrolysis and degradation	A0A7U3RWW2	https://www.uniprot.org/uniprotkb/A0A7U3RWW2/entry	Endopeptidase Clp	195	MPIGVPKVPFRIPGDENFSWIDVNRLYHERLLFLGQGVDSEISNQLIGIMVYLSMEDDTKDLYLFINSPGGWVVPGVALYDTMQFVQPDVQTICMGLAASMGSFILVGGKITKRLAFPHARVMIHQPASSFYEAQTGEVILEAEELLKLRETITRVYVQRTGKPLWVVSEDMERDVFMSATEAQVYGIVDLVAAE	Trypsin	7 11 25 30 60 110 113 114 121 148 150 155 160 174	14	105
								Pepsin	17 18 19 20 26 31 33 34 45 46 51 52 53 61 63 64 65 71 72 78 79 80 84 85 96 97 103 104 105 106 117 130 131 132 140 141 145 146 147 148 149 156 164 166 177 185 186 190 191	49	1225
3	ATP synthase subunit beta, chloroplastic	Energy	A0A7U3RVA5	https://www.uniprot.org/uniprotkb/A0A7U3RVA5/entry	F-ATPase subunit beta	498	MRINPTTSGPGASVLEKKNLGRIIQIIGPVLDVAFPPGKMPNIYNALVVKGRDTVGKPINVTCEVQQLLGNNRVRAVAMSATDGLTRGMEVIDTGAPLSVPVGGATLGRIFNVLGEPIDNLGPVDTRTTSPIHRSAPAFIQLDTKLSIFETGIKVVDLLAPYRRGGKIGLFGGAGVGKTVLIMELINNIAKAHGGVSVFGGVGERTREGNDLYMEMKESGVINEQNIAESKVALVYGQMNEPPGARMRVGLTALTMAEYFRDVNEQDVLLFIDNIFRFVQAGSEVSALLGRMPSAVGYQPTLSTEMGSLQERITSTKEGSITSIQAVYVPADDLTDPAPATTFAHLDATTVLSRGLAAKGIYPAVDPLDSTSTMLQPRIVGEEHYETAQRVKQTLQRYK…	Trypsin	2 17 18 22 39 50 52 73 75 87 109 127 134 145 154 163 164 167 178 191 205 207 217 231 246 248 261 277 291 312 317 354 359 378 390 392 397 399 418 423 425 426 429 447 456 486 497 498	48	1176
								Pepsin	14 15 31 43 44 46 47 67 68 69 84 85 97 106 107 110 113 114 120 139 141 142 145 146 148 149 157 158 161 170 171 181 184 185 198 199 211 212 213 234 235 236 251 253 254 258 259 260 268 269 270 271 275 276 278 287 288 289 297 302 308 309 327 333 334 342 343 345 346 351 352 355 362 367 374 384 385 395 398 400 407 408 409 410 412 413 419 430 434 436 440 441 447 448 450 451 457 459 460 461 462 465 466 …	112	6328
7	ATP synthase subunit b, chloroplast	Component	A0A7U3NIK7	https://www.uniprot.org/uniprotkb/A0A7U3NIK7/entry	ATPase subunit I	184	MKNVTDSFLSLGYWPSAGSFGFNTDILATNPINLSVVFGVLIFFGKGVLSDLLDNRKQRILNTIRNSEELCGGAIEQLEKARARLRKVEMEADQFRVNGYSEIEREKLNFINSTYKTLEQLENYKNETIHFEQQRTINQVRQRVFQQALQGALGTLNSCLNNELHLRTISANIGMFGTMKEITD	Trypsin	2 46 56 57 59 65 80 82 84 86 87 96 105 107 116 125 135 141 143 167 180	21	231
								Pepsin	7 8 9 10 11 12 14 19 20 21 22 26 27 33 34 37 38 40 41 42 43 44 49 51 52 53 60 69 70 77 78 85 94 95 99 100 108 110 114 115 117 120 121 123 124 130 131 144 148 149 152 153 155 156 159 160 163 164 165 166 175 176	62	1953
8	Photosystem II D2 protein	Photosystem	A0A7U3W9D9	https://www.uniprot.org/uniprotkb/A0A7U3W9D9/entry	PSII D2 protein	353	MTIALGKFTKDENDLFDIMDDWLRRDRFVFVGWSGLLLFPCAYFALGGWFTGTTFVTSWYTHGLASSYLEGCNFLTAAVSTPANSLAHSLLLLWGPEAQGDFTRWCQLGGLWTFVALHGAFGLIGFMLRQFELARSVQLRPYNAIAFSGPIAVFVSVFLIYPLGQSGWFFAPSFGVAAIFRFILFFQGFHNWTLNPFHMMGVAGVLGAALLCAIHGATVENTLFEDGDGANTFRAFNPTQAEETYSMVTANRFWSQIFGVAFSNKRWLHFFMLFVPVTGLWMSALGVVGLALNLRAYDFVSQEIRAAEDPEFETFYTKNILLNEGIRAWMAAQDQPHENLIFPEEVLPRGNAL	Trypsin	7 10 24 25 27 104 129 135 181 234 252 265 266 295 305 318 327 349	18	171
								Pepsin	4 5 7 8 14 15 16 21 22 23 28 30 32 33 35 36 37 39 42 43 44 45 46 48 49 50 54 55 58 59 60 63 67 68 69 73 74 75 85 86 89 91 92 93 101 102 105 107 108 110 111 112 113 114 116 117 121 122 123 125 126 127 128 130 132 133 138 141 146 147 153 154 157 158 159 161 162 167 168 169 174 179 180 182 184 185 186 188 189 191 193 196 205 206 209 210 211 222 223 224 232 233 235 244 245 253 257 258 261 262 269 270…	140	9870

## Sheet: Peptide
Protein	Enzyme	Cut	Sequence	Energy (kcal)
Ribulose bisphosphate carboxylase large chain	Trypsin	1	MSPQTETKASVGFKAGVKDYK	9.24
Ribulose bisphosphate carboxylase large chain	Trypsin	2	MSPQTETKASVGFKAGVKDYKLTYYTPDYET	13.64
Ribulose bisphosphate carboxylase large chain	Trypsin	3	KASVGFKAGVKDYKLTYYTPDYETK	11
Ribulose bisphosphate carboxylase large chain	Trypsin	4	KASVGFKAGVKDYKLTYYTPDYETKDTDILAAFR	14.96
Ribulose bisphosphate carboxylase large chain	Trypsin	5	KAGVKDYKLTYYTPDYETKDTDILAAFR	12.32
Ribulose bisphosphate carboxylase large chain	Trypsin	6	KDYKLTYYTPDYETKDTDILAAFR	10.56
Ribulose bisphosphate carboxylase large chain	Trypsin	7	KLTYYTPDYETKDTDILAAFR	9.24
Ribulose bisphosphate carboxylase large chain	Trypsin	8	RVTPQPGVPPEEAGAAVAAESSTGTWTTVWTDGLTSLDR	17.16
Ribulose bisphosphate carboxylase large chain	Trypsin	9	KALRALRLEDLRIPPAYSKTFQGPPHGIQVER	14.08
Ribulose bisphosphate carboxylase large chain	Trypsin	10	KALRALRLEDLRIPPAYSKTFQGPPHGIQVERDK	14.96
Ribulose bisphosphate carboxylase large chain	Trypsin	11	KALRALRLEDLRIPPAYSKTFQGPPHGIQVERDKLNK	16.28
Ribulose bisphosphate carboxylase large chain	Trypsin	12	RALRLEDLRIPPAYSKTFQGPPHGIQVER	12.76
Ribulose bisphosphate carboxylase large chain	Trypsin	13	RALRLEDLRIPPAYSKTFQGPPHGIQVERDK	13.64
Ribulose bisphosphate carboxylase large chain	Trypsin	14	RALRLEDLRIPPAYSKTFQGPPHGIQVERDKLNK	14.96
Ribulose bisphosphate carboxylase large chain	Trypsin	15	RLEDLRIPPAYSKTFQGPPHGIQVER	11.44
Ribulose bisphosphate carboxylase large chain	Trypsin	16	RLEDLRIPPAYSKTFQGPPHGIQVERDK	12.32
Ribulose bisphosphate carboxylase large chain	Trypsin	17	RLEDLRIPPAYSKTFQGPPHGIQVERDKLNK	13.64
Ribulose bisphosphate carboxylase large chain	Trypsin	18	RIPPAYSKTFQGPPHGIQVER	9.24
Ribulose bisphosphate carboxylase large chain	Trypsin	19	RIPPAYSKTFQGPPHGIQVERDK	10.12
Ribulose bisphosphate carboxylase large chain	Trypsin	20	RIPPAYSKTFQGPPHGIQVERDKLNK	11.44
Ribulose bisphosphate carboxylase large chain	Trypsin	21	RIPPAYSKTFQGPPHGIQVERDKLNKYGRPLLGCTIKPK	17.16
Ribulose bisphosphate carboxylase large chain	Trypsin	22	KTFQGPPHGIQVERDKLNKYGRPLLGCTIKPK	14.08
Ribulose bisphosphate carboxylase large chain	Trypsin	23	KTFQGPPHGIQVERDKLNKYGRPLLGCTIKPKLGLSAK	16.72
Ribulose bisphosphate carboxylase large chain	Trypsin	24	RDKLNKYGRPLLGCTIKPKLGLSAK	11
Ribulose bisphosphate carboxylase large chain	Trypsin	25	RDKLNKYGRPLLGCTIKPKLGLSAKNYGR	12.76
Ribulose bisphosphate carboxylase large chain	Trypsin	26	RDKLNKYGRPLLGCTIKPKLGLSAKNYGRAVYECLR	15.84
Ribulose bisphosphate carboxylase large chain	Trypsin	27	KLNKYGRPLLGCTIKPKLGLSAK	10.12
Ribulose bisphosphate carboxylase large chain	Trypsin	28	KLNKYGRPLLGCTIKPKLGLSAKNYGR	11.88
Ribulose bisphosphate carboxylase large chain	Trypsin	29	KLNKYGRPLLGCTIKPKLGLSAKNYGRAVYECLR	14.96
Ribulose bisphosphate carboxylase large chain	Trypsin	30	KYGRPLLGCTIKPKLGLSAKNYGR	10.56
Ribulose bisphosphate carboxylase large chain	Trypsin	31	KYGRPLLGCTIKPKLGLSAKNYGRAVYECLR	13.64
Ribulose bisphosphate carboxylase large chain	Trypsin	32	KYGRPLLGCTIKPKLGLSAKNYGRAVYECLRGGLDFTK	16.72
Ribulose bisphosphate carboxylase large chain	Trypsin	33	KLGLSAKNYGRAVYECLRGGLDFTK	11
Ribulose bisphosphate carboxylase large chain	Trypsin	34	KLGLSAKNYGRAVYECLRGGLDFTKDDENVNSQPFMR	16.28
Ribulose bisphosphate carboxylase large chain	Trypsin	35	KLGLSAKNYGRAVYECLRGGLDFTKDDENVNSQPFMRWR	17.16
Ribulose bisphosphate carboxylase large chain	Trypsin	36	KNYGRAVYECLRGGLDFTKDDENVNSQPFMR	13.64
Ribulose bisphosphate carboxylase large chain	Trypsin	37	KNYGRAVYECLRGGLDFTKDDENVNSQPFMRWR	14.52
Ribulose bisphosphate carboxylase large chain	Trypsin	38	KNYGRAVYECLRGGLDFTKDDENVNSQPFMRWRDR	15.4
Ribulose bisphosphate carboxylase large chain	Trypsin	39	RAVYECLRGGLDFTKDDENVNSQPFMR	11.88
Ribulose bisphosphate carboxylase large chain	Trypsin	40	RAVYECLRGGLDFTKDDENVNSQPFMRWR	12.76
Ribulose bisphosphate carboxylase large chain	Trypsin	41	RAVYECLRGGLDFTKDDENVNSQPFMRWRDR	13.64
Ribulose bisphosphate carboxylase large chain	Trypsin	42	RGGLDFTKDDENVNSQPFMRWR	9.68
Ribulose bisphosphate carboxylase large chain	Trypsin	43	RGGLDFTKDDENVNSQPFMRWRDR	10.56
Ribulose bisphosphate carboxylase large chain	Trypsin	44	RGGLDFTKDDENVNSQPFMRWRDRFVFCAEALYK	14.96
Ribulose bisphosphate carboxylase large chain	Trypsin	45	KDDENVNSQPFMRWRDRFVFCAEALYK	11.88
Ribulose bisphosphate carboxylase large chain	Trypsin	46	KDDENVNSQPFMRWRDRFVFCAEALYKAQAETGEIK	15.84
Ribulose bisphosphate carboxylase large chain	Trypsin	47	RWRDRFVFCAEALYKAQAETGEIK	10.56
Ribulose bisphosphate carboxylase large chain	Trypsin	48	RDRFVFCAEALYKAQAETGEIK	9.68
Ribulose bisphosphate carboxylase large chain	Trypsin	49	RDRFVFCAEALYKAQAETGEIKGHYLNATAGTCEEMIK	16.72
Ribulose bisphosphate carboxylase large chain	Trypsin	50	RDRFVFCAEALYKAQAETGEIKGHYLNATAGTCEEMIKR	17.16
Ribulose bisphosphate carboxylase large chain	Trypsin	51	RFVFCAEALYKAQAETGEIKGHYLNATAGTCEEMIK	15.84
Ribulose bisphosphate carboxylase large chain	Trypsin	52	RFVFCAEALYKAQAETGEIKGHYLNATAGTCEEMIKR	16.28
Ribulose bisphosphate carboxylase large chain	Trypsin	53	KAQAETGEIKGHYLNATAGTCEEMIK	11.44
Ribulose bisphosphate carboxylase large chain	Trypsin	54	KAQAETGEIKGHYLNATAGTCEEMIKR	11.88
Ribulose bisphosphate carboxylase large chain	Trypsin	55	KAQAETGEIKGHYLNATAGTCEEMIKRAVFAR	14.08
Ribulose bisphosphate carboxylase large chain	Trypsin	56	KGHYLNATAGTCEEMIKRAVFAR	10.12
Ribulose bisphosphate carboxylase large chain	Trypsin	57	KRAVFARELGVPIVMHDYLTGGFTANTSLAHYCR	14.96
Ribulose bisphosphate carboxylase large chain	Trypsin	58	RAVFARELGVPIVMHDYLTGGFTANTSLAHYCR	14.52
Ribulose bisphosphate carboxylase large chain	Trypsin	59	RELGVPIVMHDYLTGGFTANTSLAHYCR	12.32
Ribulose bisphosphate carboxylase large chain	Trypsin	60	RELGVPIVMHDYLTGGFTANTSLAHYCRDNGLLLHIHR	16.72
Ribulose bisphosphate carboxylase large chain	Trypsin	61	RDNGLLLHIHRAMHAVIDRQK	9.24
Ribulose bisphosphate carboxylase large chain	Trypsin	62	RDNGLLLHIHRAMHAVIDRQKNHGMHFR	12.32
Ribulose bisphosphate carboxylase large chain	Trypsin	63	RDNGLLLHIHRAMHAVIDRQKNHGMHFRVLAK	14.08
Ribulose bisphosphate carboxylase large chain	Trypsin	64	RDNGLLLHIHRAMHAVIDRQKNHGMHFRVLAKALR	15.4
Ribulose bisphosphate carboxylase large chain	Trypsin	65	RAMHAVIDRQKNHGMHFRVLAK	9.68
Ribulose bisphosphate carboxylase large chain	Trypsin	66	RAMHAVIDRQKNHGMHFRVLAKALR	11
Ribulose bisphosphate carboxylase large chain	Trypsin	67	RQKNHGMHFRVLAKALRLSGGDHIHAGTVVGK	14.08
Ribulose bisphosphate carboxylase large chain	Trypsin	68	RQKNHGMHFRVLAKALRLSGGDHIHAGTVVGKLEGER	16.28
Ribulose bisphosphate carboxylase large chain	Trypsin	69	KNHGMHFRVLAKALRLSGGDHIHAGTVVGK	13.2
Ribulose bisphosphate carboxylase large chain	Trypsin	70	KNHGMHFRVLAKALRLSGGDHIHAGTVVGKLEGER	15.4
Ribulose bisphosphate carboxylase large chain	Trypsin	71	RVLAKALRLSGGDHIHAGTVVGK	10.12
Ribulose bisphosphate carboxylase large chain	Trypsin	72	RVLAKALRLSGGDHIHAGTVVGKLEGER	12.32
Ribulose bisphosphate carboxylase large chain	Trypsin	73	RVLAKALRLSGGDHIHAGTVVGKLEGEREITLGFVDLLR	17.16
Ribulose bisphosphate carboxylase large chain	Trypsin	74	KALRGGHIHAGTVVGKLEGER	9.24
Ribulose bisphosphate carboxylase large chain	Trypsin	75	KALRLSGGDHIHAGTVVGKLEGEREITLGFVDLLR	15.4
Ribulose bisphosphate carboxylase large chain	Trypsin	76	RLSGGDHIHAGTVVGKLEGER	9.24
Ribulose bisphosphate carboxylase large chain	Trypsin	77	RLSGGDHIHAGTVVGKLEGEREITLGFVDLLR	14.08
Ribulose bisphosphate carboxylase large chain	Trypsin	78	RLSGGDHIHAGTVVGKLEGEREITLGFVDLLRDDYVEK	16.72
Ribulose bisphosphate carboxylase large chain	Trypsin	79	KLEGEREITLGFVDLLRDDVEK	9.68
Ribulose bisphosphate carboxylase large chain	Trypsin	80	KLEGEREITLGFVDLLRDDYVEKDR	11
Ribulose bisphosphate carboxylase large chain	Trypsin	81	KLEGEREITLGFVDLLRDDYVEKDRSR	11.88
Ribulose bisphosphate carboxylase large chain	Trypsin	82	REITLGFVDLLRDDYVEKDRSR	9.68
Ribulose bisphosphate carboxylase large chain	Trypsin	83	RVALEACVQARNEGRDLAREGNEIIR	11.44
Ribulose bisphosphate carboxylase large chain	Trypsin	84	RVALEACVQARNEGRDLAREGNEIIREASK	13.2
Ribulose bisphosphate carboxylase large chain	Trypsin	85	RNEGRDLAREGNEIIREASKWSPELAAACEVWK	14.52
Ribulose bisphosphate carboxylase large chain	Trypsin	86	RNEGRDLAREGNEIIREASKWSPELAAACEVWKEIK	15.84
Ribulose bisphosphate carboxylase large chain	Trypsin	87	RDLAREGNEIIREASKWSPELAAACEVWK	12.76
Ribulose bisphosphate carboxylase large chain	Trypsin	88	RDLAREGNEIIREASKWSPELAAACEVWKEIK	14.08
Ribulose bisphosphate carboxylase large chain	Trypsin	89	REGNEIIREASKWSPELAAACEVWK	11
Ribulose bisphosphate carboxylase large chain	Trypsin	90	SKWSPELAAACEVWKEIK	7.92
Ribulose bisphosphate carboxylase large chain	Trypsin	91	REGNEIIREAREASKWSPELAAACEVWKEIK	13.64
Ribulose bisphosphate carboxylase large chain	Pepsin	1	MSPQTETKASVGFKAGVKDYK	9.24
Ribulose bisphosphate carboxylase large chain	Pepsin	2	MSPQTETKASVGFKAGVKDYKLTYYTPDY	12.76
Ribulose bisphosphate carboxylase large chain	Pepsin	3	MSPQTETKASVGFKAGVKDYKLTYYTPDYETKDTDILAA	17.16
Ribulose bisphosphate carboxylase large chain	Pepsin	4	GFKAGVKDYKLTYYTPDYETKDTDI	11
Ribulose bisphosphate carboxylase large chain	Pepsin	5	GFKAGVKDYKLTYYTPDYETKDTDILAAF	12.76
Ribulose bisphosphate carboxylase large chain	Pepsin	6	FKAGVKDYKLTYYTPDYETKDTDI	10.56
Ribulose bisphosphate carboxylase large chain	Pepsin	7	FKAGVKDYKLTYYTPDYETKDTDILAAF	12.32
Ribulose bisphosphate carboxylase large chain	Pepsin	8	DYKLTYYTPDYETKDTDILAAF	9.68
Ribulose bisphosphate carboxylase large chain	Pepsin	9	YETKDTDILAAFRVTPQPGVPPEEAGAAVAAESSTGT	16.28
Ribulose bisphosphate carboxylase large chain	Pepsin	10	YETKDTDILAAFRVTPQPGVPPEEAGAAVAAESSTGTW	16.72
Ribulose bisphosphate carboxylase large chain	Pepsin	11	ILAAFRVTPQPGVPPEEAGAAVAAESSTGT	13.2
Ribulose bisphosphate carboxylase large chain	Pepsin	12	ILAAFRVTPQPGVPPEEAGAAVAAESSTGTWTTVWTDGL	17.16
Ribulose bisphosphate carboxylase large chain	Pepsin	13	LAAFRVTPQPGVPPEEAGAAVAAESSTGTW	13.2
Ribulose bisphosphate carboxylase large chain	Pepsin	14	LAAFRVTPQPGVPPEEAGAAVAAESSTGTWTTVW	14.96
Ribulose bisphosphate carboxylase large chain	Pepsin	15	LAAFRVTPQPGVPPEEAGAAVAAESSTGTWTTVWTDGL	16.72
Ribulose bisphosphate carboxylase large chain	Pepsin	16	AFRVTPQPGVPPEEAGAAVAAESSTGT	11.88
Ribulose bisphosphate carboxylase large chain	Pepsin	17	AFRVTPQPGVPPEEAGAAVAAESSTGTWTTV	13.64
Ribulose bisphosphate carboxylase large chain	Pepsin	18	AFRVTPQPGVPPEEAGAAVAAESSTGTWTTVWTDGLTSL	17.16
Ribulose bisphosphate carboxylase large chain	Pepsin	19	FRVTPQPGVPPEEAGAAVAAESSTGT	11.44
Ribulose bisphosphate carboxylase large chain	Pepsin	20	FRVTPQPGVPPEEAGAAVAAESSTGTWTTVW	13.64
Ribulose bisphosphate carboxylase large chain	Pepsin	21	FRVTPQPGVPPEEAGAAVAAESSTGTWTTVWTDGLTSL	16.72
Ribulose bisphosphate carboxylase large chain	Pepsin	22	TWTTVWTDGLTSLDRYKGRCYHIEPVAGEENQ	14.08
Ribulose bisphosphate carboxylase large chain	Pepsin	23	TWTTVWTDGLTSLDRYKGRCYHIEPVAGEENQYIAY	15.84
Ribulose bisphosphate carboxylase large chain	Pepsin	24	TWTTVWTDGLTSLDRYKGRCYHIEPVAGEENQYIAYVAY	17.16
Ribulose bisphosphate carboxylase large chain	Pepsin	25	WTTVWTDGLTSLDRYKGRCYHIEPVAGEENQY	14.08
Ribulose bisphosphate carboxylase large chain	Pepsin	26	WTTVWTDGLTSLDRYKGRCYHIEPVAGEENQYIA	14.96
Ribulose bisphosphate carboxylase large chain	Pepsin	27	WTTVWTDGLTSLDRYKGRCYHIEPVAGEENQYIAYVAYP	17.16
Ribulose bisphosphate carboxylase large chain	Pepsin	28	VWTDGLTSLDRYKGRCYHIEPVAGEENQ	12.32
Ribulose bisphosphate carboxylase large chain	Pepsin	29	VWTDGLTSLDRYKGRCYHIEPVAGEENQYIAY	14.08
Ribulose bisphosphate carboxylase large chain	Pepsin	30	VWTDGLTSLDRYKGRCYHIEPVAGEENQYIAYVAYPLDL	17.16
Ribulose bisphosphate carboxylase large chain	Pepsin	31	WTDGLTSLDRYKGRCYHIEPVAGEENQ	11.88
Ribulose bisphosphate carboxylase large chain	Pepsin	32	WTDGLTSLDRYKGRCYHIEPVAGEENQYIAYVAY	14.96
Ribulose bisphosphate carboxylase large chain	Pepsin	33	WTDGLTSLDRYKGRCYHIEPVAGEENQYIAYVAYPLDLF	17.16
Ribulose bisphosphate carboxylase large chain	Pepsin	34	GLTSLDRYKGRCYHIEPVAGEENQ	10.56
Ribulose bisphosphate carboxylase large chain	Pepsin	35	GLTSLDRYKGRCYHIEPVAGEENQYIAYVAY	13.64
Ribulose bisphosphate carboxylase large chain	Pepsin	36	GLTSLDRYKGRCYHIEPVAGEENQYIAYVAYPLDLF	15.84
Ribulose bisphosphate carboxylase large chain	Pepsin	37	LTSLDRYKGRCYHIEPVAGEENQ	10.12
Ribulose bisphosphate carboxylase large chain	Pepsin	38	LTSLDRYKGRCYHIEPVAGEENQYIAYVAY	13.2
Ribulose bisphosphate carboxylase large chain	Pepsin	39	LTSLDRYKGRCYHIEPVAGEENQYIAYVAYPLDLF	15.4
Ribulose bisphosphate carboxylase large chain	Pepsin	40	SLDRYKGRCYHIEPVAGEENQY	9.68
Ribulose bisphosphate carboxylase large chain	Pepsin	41	SLDRYKGRCYHIEPVAGEENQYIAYVAY	12.32
Ribulose bisphosphate carboxylase large chain	Pepsin	42	SLDRYKGRCYHIEPVAGEENQYIAYVAYPLDLF	14.52
Ribulose bisphosphate carboxylase large chain	Pepsin	43	LDRYKGRCYHIEPVAGEENQY	9.24
Ribulose bisphosphate carboxylase large chain	Pepsin	44	LDRYKGRCYHIEPVAGEENQYIAYVAY	11.88
Ribulose bisphosphate carboxylase large chain	Pepsin	45	LDRYKGRCYHIEPVAGEENQYIAYVAYPLDLF	14.08
Ribulose bisphosphate carboxylase large chain	Pepsin	46	YKGRCYHIEPVAGEENQYIAY	9.24
Ribulose bisphosphate carboxylase large chain	Pepsin	47	YKGRCYHIEPVAGEENQYIAYVAYPLD	11.88
Ribulose bisphosphate carboxylase large chain	Pepsin	48	YKGRCYHIEPVAGEENQYIAYVAYPLDLFEEGSVTNMF	16.72
Ribulose bisphosphate carboxylase large chain	Pepsin	49	CYHIEPVAGEENQYIAYVAYP	9.24
Ribulose bisphosphate carboxylase large chain	Pepsin	50	CYHIEPVAGEENQYIAYVAYPLDLF	11
Ribulose bisphosphate carboxylase large chain	Pepsin	51	CYHIEPVAGEENQYIAYVAYPLDLFEEGSVTNMF	14.96
Ribulose bisphosphate carboxylase large chain	Pepsin	52	QYIAYVAYPLDLFEEGSVTNM	9.24
Ribulose bisphosphate carboxylase large chain	Pepsin	53	QYIAYVAYPLDLFEEGSVTNMFTSIVGNVFG	13.64
Ribulose bisphosphate carboxylase large chain	Pepsin	54	QYIAYVAYPLDLFEEGSVTNMFTSIVGNVFGFKALRA	16.28
Ribulose bisphosphate carboxylase large chain	Pepsin	55	YIAYVAYPLDLFEEGSVTNMF	9.24
Ribulose bisphosphate carboxylase large chain	Pepsin	56	YIAYVAYPLDLFEEGSVTNMFTSIVGNVFGF	13.64
Ribulose bisphosphate carboxylase large chain	Pepsin	57	YIAYVAYPLDLFEEGSVTNMFTSIVGNVFGFKALRALRL	17.16
Ribulose bisphosphate carboxylase large chain	Pepsin	58	AYVAYPLDLFEEGSVTNMFTSIVGNV	11.44
Ribulose bisphosphate carboxylase large chain	Pepsin	59	AYVAYPLDLFEEGSVTNMFTSIVGNVFGF	12.76
Ribulose bisphosphate carboxylase large chain	Pepsin	60	AYVAYPLDLFEEGSVTNMFTSIVGNVFGFKALRALRLED	17.16
Ribulose bisphosphate carboxylase large chain	Pepsin	61	YVAYPLDLFEEGSVTNMFTSIVGNV	11
Ribulose bisphosphate carboxylase large chain	Pepsin	62	YVAYPLDLFEEGSVTNMFTSIVGNVFGFKA	13.2
Ribulose bisphosphate carboxylase large chain	Pepsin	63	YVAYPLDLFEEGSVTNMFTSIVGNVFGFKALRALRLEDL	17.16
Ribulose bisphosphate carboxylase large chain	Pepsin	64	YPLDLFEEGSVTNMFTSIVGNV	9.68
Ribulose bisphosphate carboxylase large chain	Pepsin	65	YPLDLFEEGSVTNMFTSIVGNVFGFKA	11.88
Ribulose bisphosphate carboxylase large chain	Pepsin	66	YPLDLFEEGSVTNMFTSIVGNVFGFKALRALRLEDL	15.84
Ribulose bisphosphate carboxylase large chain	Pepsin	67	PLDLFEEGSVTNMFTSIVGNV	9.24
Ribulose bisphosphate carboxylase large chain	Pepsin	68	PLDLFEEGSVTNMFTSIVGNVFGFKA	11.44
Ribulose bisphosphate carboxylase large chain	Pepsin	69	PLDLFEEGSVTNMFTSIVGNVFGFKALRALRLEDL	15.4
Ribulose bisphosphate carboxylase large chain	Pepsin	70	DLFEEGSVTNMFTSIVGNVFG	9.24
Ribulose bisphosphate carboxylase large chain	Pepsin	71	DLFEEGSVTNMFTSIVGNVFGFKALRA	11.88
Ribulose bisphosphate carboxylase large chain	Pepsin	72	DLFEEGSVTNMFTSIVGNVFGFKALRALRLEDLRIPPA	16.72
Ribulose bisphosphate carboxylase large chain	Pepsin	73	LFEEGSVTNMFTSIVGNVFGF	9.24
Ribulose bisphosphate carboxylase large chain	Pepsin	74	LFEEGSVTNMFTSIVGNVFGFKALRALRL	12.76
Ribulose bisphosphate carboxylase large chain	Pepsin	75	LFEEGSVTNMFTSIVGNVFGFKALRALRLEDLRIPPAY	16.72
Ribulose bisphosphate carboxylase large chain	Pepsin	76	FEEGSVTNMFTSIVGNVFGFKA	9.68
Ribulose bisphosphate carboxylase large chain	Pepsin	77	FEEGSVTNMFTSIVGNVFGFKALRALRL	12.32
Ribulose bisphosphate carboxylase large chain	Pepsin	78	FEEGSVTNMFTSIVGNVFGFKALRALRLEDLRIPPAY	16.28
Ribulose bisphosphate carboxylase large chain	Pepsin	79	MFTSIVGNVFGFKALRALRLED	9.68
Ribulose bisphosphate carboxylase large chain	Pepsin	80	MFTSIVGNVFGFKALRALRLEDLRIPPAY	12.76
Ribulose bisphosphate carboxylase large chain	Pepsin	81	MFTSIVGNVFGFKALRALRLEDLRIPPAYSKT	14.08
Ribulose bisphosphate carboxylase large chain	Pepsin	82	FTSIVGNVFGFKALRALRLEDL	9.68
Ribulose bisphosphate carboxylase large chain	Pepsin	83	FTSIVGNVFGFKALRALRLEDLRIPPAY	12.32
Ribulose bisphosphate carboxylase large chain	Pepsin	84	FTSIVGNVFGFKALRALRLEDLRIPPAYSKT	13.64
Ribulose bisphosphate carboxylase large chain	Pepsin	85	VFGFKALRALRLEDLRIPPAYSKTFQGPPHGIQVERDKL	17.16
Ribulose bisphosphate carboxylase large chain	Pepsin	86	FGFKALRALRLEDLRIPPAYSKTFQGPPHGIQVERDKL	16.72
Ribulose bisphosphate carboxylase large chain	Pepsin	87	GFKALRALRLEDLRIPPAYSKT	9.68
Ribulose bisphosphate carboxylase large chain	Pepsin	88	FKALRALRLEDLRIPPAYSKT	9.24
Ribulose bisphosphate carboxylase large chain	Pepsin	89	FKALRALRLEDLRIPPAYSKTFQGPPHGIQVERDKLNKY	17.16
Ribulose bisphosphate carboxylase large chain	Pepsin	90	ALRALRLEDLRIPPAYSKTFQGPPHGIQVERDKL	14.96
Ribulose bisphosphate carboxylase large chain	Pepsin	91	ALRLEDLRIPPAYSKTFQGPPHGIQVERDKL	13.64
Ribulose bisphosphate carboxylase large chain	Pepsin	92	ALRLEDLRIPPAYSKTFQGPPHGIQVERDKLNKY	14.96
Ribulose bisphosphate carboxylase large chain	Pepsin	93	ALRLEDLRIPPAYSKTFQGPPHGIQVERDKLNKYGRPLL	17.16
Ribulose bisphosphate carboxylase large chain	Pepsin	94	LEDLRIPPAYSKTFQGPPHGIQVERDKLNK	13.2
Ribulose bisphosphate carboxylase large chain	Pepsin	95	LEDLRIPPAYSKTFQGPPHGIQVERDKLNKYGRPLL	15.84
Ribulose bisphosphate carboxylase large chain	Pepsin	96	DLRIPPAYSKTFQGPPHGIQVERDKL	11.44
Ribulose bisphosphate carboxylase large chain	Pepsin	97	DLRIPPAYSKTFQGPPHGIQVERDKLNKY	12.76
Ribulose bisphosphate carboxylase large chain	Pepsin	98	DLRIPPAYSKTFQGPPHGIQVERDKLNKYGRPLL	14.96
Ribulose bisphosphate carboxylase large chain	Pepsin	99	LRIPPAYSKTFQGPPHGIQVERDKL	11
Ribulose bisphosphate carboxylase large chain	Pepsin	100	LRIPPAYSKTFQGPPHGIQVERDKLNKY	12.32
Ribulose bisphosphate carboxylase large chain	Pepsin	101	LRIPPAYSKTFQGPPHGIQVERDKLNKYGRPLL	14.52
Ribulose bisphosphate carboxylase large chain	Pepsin	102	YSKTFQGPPHGIQVERDKLNK	9.24
Ribulose bisphosphate carboxylase large chain	Pepsin	103	YSKTFQGPPHGIQVERDKLNKYGRP	11
Ribulose bisphosphate carboxylase large chain	Pepsin	104	YSKTFQGPPHGIQVERDKLNKYGRPLLGCTIKPKLGL	16.28
Ribulose bisphosphate carboxylase large chain	Pepsin	105	TFQGPPHGIQVERDKLNKYGRPLL	10.56
Ribulose bisphosphate carboxylase large chain	Pepsin	106	TFQGPPHGIQVERDKLNKYGRPLLGCTIKPKL	14.08
Ribulose bisphosphate carboxylase large chain	Pepsin	107	TFQGPPHGIQVERDKLNKYGRPLLGCTIKPKLGLSAKN	16.72
Ribulose bisphosphate carboxylase large chain	Pepsin	108	LNKYGRPLLGCTIKPKLGLSAKN	10.12
Ribulose bisphosphate carboxylase large chain	Pepsin	109	LNKYGRPLLGCTIKPKLGLSAKNYGRAVYECL	14.08
Ribulose bisphosphate carboxylase large chain	Pepsin	110	LNKYGRPLLGCTIKPKLGLSAKNYGRAVYECLRGGLDF	16.72
Ribulose bisphosphate carboxylase large chain	Pepsin	111	KYGRPLLGCTIKPKLGLSAKNYGRAVY	11.88
Ribulose bisphosphate carboxylase large chain	Pepsin	112	KYGRPLLGCTIKPKLGLSAKNYGRAVYEC	12.76
Ribulose bisphosphate carboxylase large chain	Pepsin	113	KYGRPLLGCTIKPKLGLSAKNYGRAVYECLRGGLD	15.4
Ribulose bisphosphate carboxylase large chain	Pepsin	114	YGRPLLGCTIKPKLGLSAKNYGRAVY	11.44
Ribulose bisphosphate carboxylase large chain	Pepsin	115	YGRPLLGCTIKPKLGLSAKNYGRAVYECLRGGL	14.52
Ribulose bisphosphate carboxylase large chain	Pepsin	116	YGRPLLGCTIKPKLGLSAKNYGRAVYECLRGGLDF	15.4
Ribulose bisphosphate carboxylase large chain	Pepsin	117	PLLGCTIKPKLGLSAKNYGRAVYEC	11
Ribulose bisphosphate carboxylase large chain	Pepsin	118	PLLGCTIKPKLGLSAKNYGRAVYECLRGGL	13.2
Ribulose bisphosphate carboxylase large chain	Pepsin	119	PLLGCTIKPKLGLSAKNYGRAVYECLRGGLDF	14.08
Ribulose bisphosphate carboxylase large chain	Pepsin	120	LGCTIKPKLGLSAKNYGRAVY	9.24
Ribulose bisphosphate carboxylase large chain	Pepsin	121	LGCTIKPKLGLSAKNYGRAVYECL	10.56
Ribulose bisphosphate carboxylase large chain	Pepsin	122	LGCTIKPKLGLSAKNYGRAVYECLRGGLD	12.76
Ribulose bisphosphate carboxylase large chain	Pepsin	123	LGLSAKNYGRAVYECLRGGLDF	9.68
Ribulose bisphosphate carboxylase large chain	Pepsin	124	LGLSAKNYGRAVYECLRGGLDFTKDDENVNSQP	14.52
Ribulose bisphosphate carboxylase large chain	Pepsin	125	LGLSAKNYGRAVYECLRGGLDFTKDDENVNSQPFMRW	16.28
Ribulose bisphosphate carboxylase large chain	Pepsin	126	LSAKNYGRAVYECLRGGLDFTKDDENVNSQPFMRWRDRF	17.16
Ribulose bisphosphate carboxylase large chain	Pepsin	127	NYGRAVYECLRGGLDFTKDDENVNSQP	11.88
Ribulose bisphosphate carboxylase large chain	Pepsin	128	NYGRAVYECLRGGLDFTKDDENVNSQPFMRWRDRFVF	16.28
Ribulose bisphosphate carboxylase large chain	Pepsin	129	YECLRGGLDFTKDDENVNSQPFMRW	11
Ribulose bisphosphate carboxylase large chain	Pepsin	130	YECLRGGLDFTKDDENVNSQPFMRWRDRFVF	13.64
Ribulose bisphosphate carboxylase large chain	Pepsin	131	YECLRGGLDFTKDDENVNSQPFMRWRDRFVFCAEALY	16.28
Ribulose bisphosphate carboxylase large chain	Pepsin	132	CLRGGLDFTKDDENVNSQPFMRW	10.12
Ribulose bisphosphate carboxylase large chain	Pepsin	133	CLRGGLDFTKDDENVNSQPFMRWRDRFVF	12.76
Ribulose bisphosphate carboxylase large chain	Pepsin	134	CLRGGLDFTKDDENVNSQPFMRWRDRFVFCAEAL	14.96
Ribulose bisphosphate carboxylase large chain	Pepsin	135	LRGGLDFTKDDENVNSQPFMRWRDRF	11.44
Ribulose bisphosphate carboxylase large chain	Pepsin	136	LRGGLDFTKDDENVNSQPFMRWRDRFVFCAEA	14.08
Ribulose bisphosphate carboxylase large chain	Pepsin	137	LRGGLDFTKDDENVNSQPFMRWRDRFVFCAEALY	14.96
Ribulose bisphosphate carboxylase large chain	Pepsin	138	LDFTKDDENVNSQPFMRWRDRF	9.68
Ribulose bisphosphate carboxylase large chain	Pepsin	139	LDFTKDDENVNSQPFMRWRDRFVF	10.56
Ribulose bisphosphate carboxylase large chain	Pepsin	140	LDFTKDDENVNSQPFMRWRDRFVFCAEAL	12.76
Ribulose bisphosphate carboxylase large chain	Pepsin	141	DFTKDDENVNSQPFMRWRDRFVFCAEA	11.88
Ribulose bisphosphate carboxylase large chain	Pepsin	142	DFTKDDENVNSQPFMRWRDRFVFCAEALY	12.76
Ribulose bisphosphate carboxylase large chain	Pepsin	143	FTKDDENVNSQPFMRWRDRFVF	9.68
Ribulose bisphosphate carboxylase large chain	Pepsin	144	FTKDDENVNSQPFMRWRDRFVFCAEAL	11.88
Ribulose bisphosphate carboxylase large chain	Pepsin	145	PFMRWRDRFVFCAEALYKAQAETGEIKGHY	13.2
Ribulose bisphosphate carboxylase large chain	Pepsin	146	WRDRFVFCAEALYKAQAETGEIKGHY	11.44
Ribulose bisphosphate carboxylase large chain	Pepsin	147	FVFCAEALYKAQAETGEIKGHY	9.68
Ribulose bisphosphate carboxylase large chain	Pepsin	148	FVFCAEALYKAQAETGEIKGHYLNATAGTCEEMIKRAVF	17.16
Ribulose bisphosphate carboxylase large chain	Pepsin	149	FCAEALYKAQAETGEIKGHYLNATAGTCEEMIKRAVF	16.28
Ribulose bisphosphate carboxylase large chain	Pepsin	150	ALYKAQAETGEIKGHYLNATAGTCEEMIKRAVF	14.52
Ribulose bisphosphate carboxylase large chain	Pepsin	151	ALYKAQAETGEIKGHYLNATAGTCEEMIKRAVFARE	15.84
Ribulose bisphosphate carboxylase large chain	Pepsin	152	LYKAQAETGEIKGHYLNATAGTCEEMIKRAVF	14.08
Ribulose bisphosphate carboxylase large chain	Pepsin	153	LYKAQAETGEIKGHYLNATAGTCEEMIKRAVFARE	15.4
Ribulose bisphosphate carboxylase large chain	Pepsin	154	YKAQAETGEIKGHYLNATAGTCEEMIKRAVF	13.64
Ribulose bisphosphate carboxylase large chain	Pepsin	155	YKAQAETGEIKGHYLNATAGTCEEMIKRAVFARE	14.96
Ribulose bisphosphate carboxylase large chain	Pepsin	156	YLNATAGTCEEMIKRAVFARE	9.24
Ribulose bisphosphate carboxylase large chain	Pepsin	157	YLNATAGTCEEMIKRAVFARELGVPIVMHDYL	14.08
Ribulose bisphosphate carboxylase large chain	Pepsin	158	YLNATAGTCEEMIKRAVFARELGVPIVMHDYLTGGF	15.84
Ribulose bisphosphate carboxylase large chain	Pepsin	159	FARELGVPIVMHDYLTGGFTANTS	10.56
Ribulose bisphosphate carboxylase large chain	Pepsin	160	FARELGVPIVMHDYLTGGFTANTSLAHY	12.32
Ribulose bisphosphate carboxylase large chain	Pepsin	161	FARELGVPIVMHDYLTGGFTANTSLAHYCRDNGLLL	15.84
Ribulose bisphosphate carboxylase large chain	Pepsin	162	ELGVPIVMHDYLTGGFTANTSL	9.68
Ribulose bisphosphate carboxylase large chain	Pepsin	163	ELGVPIVMHDYLTGGFTANTSLAHY	11
Ribulose bisphosphate carboxylase large chain	Pepsin	164	ELGVPIVMHDYLTGGFTANTSLAHYCRDNGLL	14.08
Ribulose bisphosphate carboxylase large chain	Pepsin	165	DYLTGGFTANTSLAHYCRDNG	9.24
Ribulose bisphosphate carboxylase large chain	Pepsin	166	LTGGFTANTSLAHYCRDNGLL	9.24
Ribulose bisphosphate carboxylase large chain	Pepsin	167	GFTANTSLAHYCRDNGLLLHIHRAMHAVIDRQKNHGMH	16.72
Ribulose bisphosphate carboxylase large chain	Pepsin	168	FTANTSLAHYCRDNGLLLHIHRAMHAVIDRQKNHGMHF	16.72
Ribulose bisphosphate carboxylase large chain	Pepsin	169	SLAHYCRDNGLLLHIHRAMHAVIDRQKNHGMH	14.08
Ribulose bisphosphate carboxylase large chain	Pepsin	170	SLAHYCRDNGLLLHIHRAMHAVIDRQKNHGMHFRVLAKA	17.16
Ribulose bisphosphate carboxylase large chain	Pepsin	171	LAHYCRDNGLLLHIHRAMHAVIDRQKNHGMHFRV	14.96
Ribulose bisphosphate carboxylase large chain	Pepsin	172	HYCRDNGLLLHIHRAMHAVIDRQKNHGMHF	13.2
Ribulose bisphosphate carboxylase large chain	Pepsin	173	HYCRDNGLLLHIHRAMHAVIDRQKNHGMHFRV	14.08
Ribulose bisphosphate carboxylase large chain	Pepsin	174	HYCRDNGLLLHIHRAMHAVIDRQKNHGMHFRVLAKALRL	17.16
Ribulose bisphosphate carboxylase large chain	Pepsin	175	YCRDNGLLLHIHRAMHAVIDRQKNHGMH	12.32
Ribulose bisphosphate carboxylase large chain	Pepsin	176	YCRDNGLLLHIHRAMHAVIDRQKNHGMHFRV	13.64
Ribulose bisphosphate carboxylase large chain	Pepsin	177	YCRDNGLLLHIHRAMHAVIDRQKNHGMHFRVLAKA	15.4
Ribulose bisphosphate carboxylase large chain	Pepsin	178	GLLLHIHRAMHAVIDRQKNHGMHF	10.56
Ribulose bisphosphate carboxylase large chain	Pepsin	179	GLLLHIHRAMHAVIDRQKNHGMHFRVLAKALRL	14.52
Ribulose bisphosphate carboxylase large chain	Pepsin	180	LLLHIHRAMHAVIDRQKNHGMH	9.68
Ribulose bisphosphate carboxylase large chain	Pepsin	181	LLLHIHRAMHAVIDRQKNHGMHFRV	11
Ribulose bisphosphate carboxylase large chain	Pepsin	182	LLLHIHRAMHAVIDRQKNHGMHFRVLAKA	12.76
Ribulose bisphosphate carboxylase large chain	Pepsin	183	LLHIHRAMHAVIDRQKNHGMHF	9.68
Ribulose bisphosphate carboxylase large chain	Pepsin	184	LLHIHRAMHAVIDRQKNHGMHFRVLAKALRL	13.64
Ribulose bisphosphate carboxylase large chain	Pepsin	185	LHIHRAMHAVIDRQKNHGMHFRV	10.12
Ribulose bisphosphate carboxylase large chain	Pepsin	186	LHIHRAMHAVIDRQKNHGMHFRVLAKA	11.88
Ribulose bisphosphate carboxylase large chain	Pepsin	187	HFRVLAKALRLSGGDHIHAGTVVGK	11
Ribulose bisphosphate carboxylase large chain	Pepsin	188	HFRVLAKALRLSGGDHIHAGTVVGKLEGEREITL	14.96
Ribulose bisphosphate carboxylase large chain	Pepsin	189	HFRVLAKALRLSGGDHIHAGTVVGKLEGEREITLGFVDL	17.16
Ribulose bisphosphate carboxylase large chain	Pepsin	190	FRVLAKALRLSGGDHIHAGTVVGKL	11
Ribulose bisphosphate carboxylase large chain	Pepsin	191	FRVLAKALRLSGGDHIHAGTVVGKLEGEREITLG	14.96
Ribulose bisphosphate carboxylase large chain	Pepsin	192	FRVLAKALRLSGGDHIHAGTVVGKLEGEREITLGFVDLL	17.16
Ribulose bisphosphate carboxylase large chain	Pepsin	193	VLAKALRLSGGDHIHAGTVVGK	9.68
Ribulose bisphosphate carboxylase large chain	Pepsin	194	VLAKALRLSGGDHIHAGTVVGKLEGEREIT	13.2
Ribulose bisphosphate carboxylase large chain	Pepsin	195	VLAKALRLSGGDHIHAGTVVGKLEGEREITLGFVDL	15.84
Ribulose bisphosphate carboxylase large chain	Pepsin	196	ALRLSGGDHIHAGTVVGKLEGEREITL	11.88
Ribulose bisphosphate carboxylase large chain	Pepsin	197	ALRLSGGDHIHAGTVVGKLEGEREITLGF	12.76
Ribulose bisphosphate carboxylase large chain	Pepsin	198	ALRLSGGDHIHAGTVVGKLEGEREITLGFVDLLRDDY	16.28
Ribulose bisphosphate carboxylase large chain	Pepsin	199	LSGGDHIHAGTVVGKLEGEREIT	10.12
Ribulose bisphosphate carboxylase large chain	Pepsin	200	LSGGDHIHAGTVVGKLEGEREITLG	11
Ribulose bisphosphate carboxylase large chain	Pepsin	201	LSGGDHIHAGTVVGKLEGEREITLGFVD	12.32
Ribulose bisphosphate carboxylase large chain	Pepsin	202	LSGGDHIHAGTVVGKLEGEREITLGFVDLL	13.2
Ribulose bisphosphate carboxylase large chain	Pepsin	203	KLEGEREITLGFVDLLRDDYVEKDRSRGIY	13.2
Ribulose bisphosphate carboxylase large chain	Pepsin	204	KLEGEREITLGFVDLLRDDYVEKDRSRGIYFTQD	14.96
Ribulose bisphosphate carboxylase large chain	Pepsin	205	KLEGEREITLGFVDLLRDDYVEKDRSRGIYFTQDWVSL	16.72
Ribulose bisphosphate carboxylase large chain	Pepsin	206	LEGEREITLGFVDLLRDDYVEKDRSRGIYF	13.2
Ribulose bisphosphate carboxylase large chain	Pepsin	207	LEGEREITLGFVDLLRDDYVEKDRSRGIYFTQDW	14.96
Ribulose bisphosphate carboxylase large chain	Pepsin	208	TLGFVDLLRDDYVEKDRSRGIY	9.68
Ribulose bisphosphate carboxylase large chain	Pepsin	209	TLGFVDLLRDDYVEKDRSRGIYFTQDW	11.88
Ribulose bisphosphate carboxylase large chain	Pepsin	210	TLGFVDLLRDDYVEKDRSRGIYFTQDWVSLPGVL	14.96
Ribulose bisphosphate carboxylase large chain	Pepsin	211	LGFVDLLRDDYVEKDRSRGIYF	9.68
Ribulose bisphosphate carboxylase large chain	Pepsin	212	LGFVDLLRDDYVEKDRSRGIYFTQD	11
Ribulose bisphosphate carboxylase large chain	Pepsin	213	LGFVDLLRDDYVEKDRSRGIYFTQDWVSL	12.76
Ribulose bisphosphate carboxylase large chain	Pepsin	214	GFVDLLRDDYVEKDRSRGIYF	9.24
Ribulose bisphosphate carboxylase large chain	Pepsin	215	GFVDLLRDDYVEKDRSRGIYFTQDW	11
Ribulose bisphosphate carboxylase large chain	Pepsin	216	GFVDLLRDDYVEKDRSRGIYFTQDWVSLPGVL	14.08
Ribulose bisphosphate carboxylase large chain	Pepsin	217	FVDLLRDDYVEKDRSRGIYFTQD	10.12
Ribulose bisphosphate carboxylase large chain	Pepsin	218	FVDLLRDDYVEKDRSRGIYFTQDWVSL	11.88
Ribulose bisphosphate carboxylase large chain	Pepsin	219	DLLRDDYVEKDRSRGIYFTQD	9.24
Ribulose bisphosphate carboxylase large chain	Pepsin	220	DLLRDDYVEKDRSRGIYFTQDWVSLPGVL	12.76
Ribulose bisphosphate carboxylase large chain	Pepsin	221	DLLRDDYVEKDRSRGIYFTQDWVSLPGVLPVASGGIHV	16.72
Ribulose bisphosphate carboxylase large chain	Pepsin	222	LLRDDYVEKDRSRGIYFTQDW	9.24
Ribulose bisphosphate carboxylase large chain	Pepsin	223	LLRDDYVEKDRSRGIYFTQDWVSL	10.56
Ribulose bisphosphate carboxylase large chain	Pepsin	224	LRDDYVEKDRSRGIYFTQDWVSLPGVL	11.88
Ribulose bisphosphate carboxylase large chain	Pepsin	225	LRDDYVEKDRSRGIYFTQDWVSLPGVLPVASGGIHV	15.84
Ribulose bisphosphate carboxylase large chain	Pepsin	226	YVEKDRSRGIYFTQDWVSLPGVLPVASGGIHVWHMPAL	16.72
Ribulose bisphosphate carboxylase large chain	Pepsin	227	YFTQDWVSLPGVLPVASGGIHV	9.68
Ribulose bisphosphate carboxylase large chain	Pepsin	228	YFTQDWVSLPGVLPVASGGIHVWHMPALTEIF	14.08
Ribulose bisphosphate carboxylase large chain	Pepsin	229	YFTQDWVSLPGVLPVASGGIHVWHMPALTEIFGDDSVLQ	17.16
Ribulose bisphosphate carboxylase large chain	Pepsin	230	FTQDWVSLPGVLPVASGGIHVWHMPAL	11.88
Ribulose bisphosphate carboxylase large chain	Pepsin	231	FTQDWVSLPGVLPVASGGIHVWHMPALTEIFGDDSV	15.84
Ribulose bisphosphate carboxylase large chain	Pepsin	232	FTQDWVSLPGVLPVASGGIHVWHMPALTEIFGDDSVLQF	17.16
Ribulose bisphosphate carboxylase large chain	Pepsin	233	DWVSLPGVLPVASGGIHVWHMPAL	10.56
Ribulose bisphosphate carboxylase large chain	Pepsin	234	DWVSLPGVLPVASGGIHVWHMPALTEIF	12.32
Ribulose bisphosphate carboxylase large chain	Pepsin	235	DWVSLPGVLPVASGGIHVWHMPALTEIFGDDSVLQ	15.4
Ribulose bisphosphate carboxylase large chain	Pepsin	236	WVSLPGVLPVASGGIHVWHMPALTEI	11.44
Ribulose bisphosphate carboxylase large chain	Pepsin	237	WVSLPGVLPVASGGIHVWHMPALTEIFGDDSVL	14.52
Ribulose bisphosphate carboxylase large chain	Pepsin	238	WVSLPGVLPVASGGIHVWHMPALTEIFGDDSVLQFGGGT	17.16
Ribulose bisphosphate carboxylase large chain	Pepsin	239	LPGVLPVASGGIHVWHMPALTEIF	10.56
Ribulose bisphosphate carboxylase large chain	Pepsin	240	LPGVLPVASGGIHVWHMPALTEIFGDDSVLQF	14.08
Ribulose bisphosphate carboxylase large chain	Pepsin	241	LPGVLPVASGGIHVWHMPALTEIFGDDSVLQFGGGTL	16.28
Ribulose bisphosphate carboxylase large chain	Pepsin	242	LPVASGGIHVWHMPALTEIFGDDSV	11
Ribulose bisphosphate carboxylase large chain	Pepsin	243	LPVASGGIHVWHMPALTEIFGDDSVLQ	11.88
Ribulose bisphosphate carboxylase large chain	Pepsin	244	LPVASGGIHVWHMPALTEIFGDDSVLQFGGGTLGHP	15.84
Ribulose bisphosphate carboxylase large chain	Pepsin	245	VWHMPALTEIFGDDSVLQFGGGTL	10.56
Ribulose bisphosphate carboxylase large chain	Pepsin	246	LTEIFGDDSVLQFGGGTLGHP	9.24
Ribulose bisphosphate carboxylase large chain	Pepsin	247	LTEIFGDDSVLQFGGGTLGHPWGNAPGAVANRVAL	15.4
Ribulose bisphosphate carboxylase large chain	Pepsin	248	IFGDDSVLQFGGGTLGHPWGNAPGAVANRVAL	14.08
Ribulose bisphosphate carboxylase large chain	Pepsin	249	FGDDSVLQFGGGTLGHPWGNAPGAVANRVAL	13.64
Ribulose bisphosphate carboxylase large chain	Pepsin	250	VLQFGGGTLGHPWGNAPGAVANRVAL	11.44
Ribulose bisphosphate carboxylase large chain	Pepsin	251	VLQFGGGTLGHPWGNAPGAVANRVALEACVQARNEGRD	16.72
Ribulose bisphosphate carboxylase large chain	Pepsin	252	LQFGGGTLGHPWGNAPGAVANRVAL	11
Ribulose bisphosphate carboxylase large chain	Pepsin	253	LQFGGGTLGHPWGNAPGAVANRVALEACVQARNEGRD	16.28
Ribulose bisphosphate carboxylase large chain	Pepsin	254	QFGGGTLGHPWGNAPGAVANRVAL	10.56
Ribulose bisphosphate carboxylase large chain	Pepsin	255	QFGGGTLGHPWGNAPGAVANRVALEACVQARNEGRD	15.84
Ribulose bisphosphate carboxylase large chain	Pepsin	256	FGGGTLGHPWGNAPGAVANRVAL	10.12
Ribulose bisphosphate carboxylase large chain	Pepsin	257	FGGGTLGHPWGNAPGAVANRVALEACVQARNEGRD	15.4
Ribulose bisphosphate carboxylase large chain	Pepsin	258	TLGHPWGNAPGAVANRVALEACVQARNEGRD	13.64
Ribulose bisphosphate carboxylase large chain	Pepsin	259	LGHPWGNAPGAVANRVALEACVQARNEGRD	13.2
Ribulose bisphosphate carboxylase large chain	Pepsin	260	PWGNAPGAVANRVALEACVQARNEGRD	11.88
Ribulose bisphosphate carboxylase large chain	Pepsin	261	LEACVQARNEGRDLAREGNEIIREASK	11.88
Ribulose bisphosphate carboxylase large chain	Pepsin	262	LEACVQARNEGRDLAREGNEIIREASKWSPEL	14.08
Ribulose bisphosphate carboxylase large chain	Pepsin	263	LEACVQARNEGRDLAREGNEIIREASKWSPELAAACEVW	17.16
Ribulose bisphosphate carboxylase large chain	Pepsin	264	DLAREGNEIIREASKWSPELAAACEV	11.44
Ribulose bisphosphate carboxylase large chain	Pepsin	265	DLAREGNEIIREASKWSPELAAACEVWKEIKF	14.08
Ribulose bisphosphate carboxylase large chain	Pepsin	266	DLAREGNEIIREASKWSPELAAACEVWKEIKFEFQAMDT	17.16
Ribulose bisphosphate carboxylase large chain	Pepsin	267	KWSPELAAACEVWKEIKFEFQAMDTL	11.44
Ribulose bisphosphate carboxylase large chain	Pepsin	268	LAAACEVWKEIKFEFQAMDTL	9.24
ATP-dependent Clp protease proteolytic subunit	Trypsin	1	MPIGVPKVPFRIPGDENFSWIDVNR	11
ATP-dependent Clp protease proteolytic subunit	Trypsin	2	MPIGVPKVPFRIPGDENFSWIDVNRLYHER	13.2
ATP-dependent Clp protease proteolytic subunit	Trypsin	3	KVPFRIPGDENFSWIDVNRLYHER	10.56
ATP-dependent Clp protease proteolytic subunit	Trypsin	4	RLYHERLLFLGQGVDSEISNQLIGIMVYLSMEDDTK	15.84
ATP-dependent Clp protease proteolytic subunit	Trypsin	5	RLLFLGQGVDSEISNQLIGIMVYLSMEDDTK	13.64
ATP-dependent Clp protease proteolytic subunit	Trypsin	6	KITKRLAFPHARVMIHQPASSFYEAQTGEVILEAEELLK	17.16
ATP-dependent Clp protease proteolytic subunit	Trypsin	7	KRLAFPHARVMIHQPASSFYEAQTGEVILEAEELLK	15.84
ATP-dependent Clp protease proteolytic subunit	Trypsin	8	KRLAFPHARVMIHQPASSFYEAQTGEVILEAEELLKLR	16.72
ATP-dependent Clp protease proteolytic subunit	Trypsin	9	RLAFPHARVMIHQPASSFYEAQTGEVILEAEELLK	15.4
ATP-dependent Clp protease proteolytic subunit	Trypsin	10	RLAFPHARVMIHQPASSFYEAQTGEVILEAEELLKLR	16.28
ATP-dependent Clp protease proteolytic subunit	Trypsin	11	RVMIHQPASSFYEAQTGEVILEAEELLK	12.32
ATP-dependent Clp protease proteolytic subunit	Trypsin	12	RVMIHQPASSFYEAQTGEVILEAEELLKLR	13.2
ATP-dependent Clp protease proteolytic subunit	Trypsin	13	RVMIHQPASSFYEAQTGEVILEAEELLKLRETITR	15.4
ATP-dependent Clp protease proteolytic subunit	Trypsin	14	KLRETITRVYVQRTGKPLWVVSEDMER	11.88
ATP-dependent Clp protease proteolytic subunit	Trypsin	15	RETITRVYVQRTGKPLWVVSEDMER	11
ATP-dependent Clp protease proteolytic subunit	Pepsin	1	MPIGVPKVPFRIPGDENFSWIDVNRL	11.44
ATP-dependent Clp protease proteolytic subunit	Pepsin	2	MPIGVPKVPFRIPGDENFSWIDVNRLYHERLLFL	14.96
ATP-dependent Clp protease proteolytic subunit	Pepsin	3	NFSWIDVNRLYHERLLFLGQGVDSEISNQ	12.76
ATP-dependent Clp protease proteolytic subunit	Pepsin	4	NFSWIDVNRLYHERLLFLGQGVDSEISNQLIGIMV	15.4
ATP-dependent Clp protease proteolytic subunit	Pepsin	5	NFSWIDVNRLYHERLLFLGQGVDSEISNQLIGIMVYL	16.28
ATP-dependent Clp protease proteolytic subunit	Pepsin	6	FSWIDVNRLYHERLLFLGQGVDSEISNQL	12.76
ATP-dependent Clp protease proteolytic subunit	Pepsin	7	FSWIDVNRLYHERLLFLGQGVDSEISNQLIGIMVY	15.4
ATP-dependent Clp protease proteolytic subunit	Pepsin	8	SWIDVNRLYHERLLFLGQGVDSEISNQ	11.88
ATP-dependent Clp protease proteolytic subunit	Pepsin	9	SWIDVNRLYHERLLFLGQGVDSEISNQLIGIMV	14.52
ATP-dependent Clp protease proteolytic subunit	Pepsin	10	SWIDVNRLYHERLLFLGQGVDSEISNQLIGIMVYL	15.4
ATP-dependent Clp protease proteolytic subunit	Pepsin	11	WIDVNRLYHERLLFLGQGVDSEISNQL	11.88
ATP-dependent Clp protease proteolytic subunit	Pepsin	12	WIDVNRLYHERLLFLGQGVDSEISNQLIGIMVY	14.52
ATP-dependent Clp protease proteolytic subunit	Pepsin	13	LYHERLLFLGQGVDSEISNQL	9.24
ATP-dependent Clp protease proteolytic subunit	Pepsin	14	LYHERLLFLGQGVDSEISNQLIGIMVYL	12.32
ATP-dependent Clp protease proteolytic subunit	Pepsin	15	LYHERLLFLGQGVDSEISNQLIGIMVYLSMEDDTKDLYL	17.16
ATP-dependent Clp protease proteolytic subunit	Pepsin	16	LLFLGQGVDSEISNQLIGIMV	9.24
ATP-dependent Clp protease proteolytic subunit	Pepsin	17	LLFLGQGVDSEISNQLIGIMVYLSMEDDTKD	13.64
ATP-dependent Clp protease proteolytic subunit	Pepsin	18	LLFLGQGVDSEISNQLIGIMVYLSMEDDTKDLYLF	15.4
ATP-dependent Clp protease proteolytic subunit	Pepsin	19	FLGQGVDSEISNQLIGIMVYL	9.24
ATP-dependent Clp protease proteolytic subunit	Pepsin	20	FLGQGVDSEISNQLIGIMVYLSMEDDTKDLYL	14.08
ATP-dependent Clp protease proteolytic subunit	Pepsin	21	FLGQGVDSEISNQLIGIMVYLSMEDDTKDLYLFINSPGG	17.16
ATP-dependent Clp protease proteolytic subunit	Pepsin	22	LGQGVDSEISNQLIGIMVYLSMEDDTKD	12.32
ATP-dependent Clp protease proteolytic subunit	Pepsin	23	LGQGVDSEISNQLIGIMVYLSMEDDTKDLYLF	14.08
ATP-dependent Clp protease proteolytic subunit	Pepsin	24	LGQGVDSEISNQLIGIMVYLSMEDDTKDLYLFINSPGGW	17.16
ATP-dependent Clp protease proteolytic subunit	Pepsin	25	QLIGIMVYLSMEDDTKDLYLF	9.24
ATP-dependent Clp protease proteolytic subunit	Pepsin	26	QLIGIMVYLSMEDDTKDLYLFINSPGG	11.88
ATP-dependent Clp protease proteolytic subunit	Pepsin	27	QLIGIMVYLSMEDDTKDLYLFINSPGGWVVPGVALY	15.84
ATP-dependent Clp protease proteolytic subunit	Pepsin	28	LIGIMVYLSMEDDTKDLYLFINSPGGW	11.88
ATP-dependent Clp protease proteolytic subunit	Pepsin	29	LIGIMVYLSMEDDTKDLYLFINSPGGWVVPGVA	14.52
ATP-dependent Clp protease proteolytic subunit	Pepsin	30	LIGIMVYLSMEDDTKDLYLFINSPGGWVVPGVALYDTMQ	17.16
ATP-dependent Clp protease proteolytic subunit	Pepsin	31	VYLSMEDDTKDLYLFINSPGG	9.24
ATP-dependent Clp protease proteolytic subunit	Pepsin	32	VYLSMEDDTKDLYLFINSPGGWVVPGVALY	13.2
ATP-dependent Clp protease proteolytic subunit	Pepsin	33	VYLSMEDDTKDLYLFINSPGGWVVPGVALYDTMQF	15.4
ATP-dependent Clp protease proteolytic subunit	Pepsin	34	YLSMEDDTKDLYLFINSPGGW	9.24
ATP-dependent Clp protease proteolytic subunit	Pepsin	35	YLSMEDDTKDLYLFINSPGGWVVPGVAL	12.32
ATP-dependent Clp protease proteolytic subunit	Pepsin	36	YLSMEDDTKDLYLFINSPGGWVVPGVALYDTMQ	14.52
ATP-dependent Clp protease proteolytic subunit	Pepsin	37	LSMEDDTKDLYLFINSPGGWVVPGVA	11.44
ATP-dependent Clp protease proteolytic subunit	Pepsin	38	LSMEDDTKDLYLFINSPGGWVVPGVALY	12.32
ATP-dependent Clp protease proteolytic subunit	Pepsin	39	LSMEDDTKDLYLFINSPGGWVVPGVALYDTMQF	14.52
ATP-dependent Clp protease proteolytic subunit	Pepsin	40	DLYLFINSPGGWVVPGVALYDTMQ	10.56
ATP-dependent Clp protease proteolytic subunit	Pepsin	41	DLYLFINSPGGWVVPGVALYDTMQFVQPDVQTICMGL	16.28
ATP-dependent Clp protease proteolytic subunit	Pepsin	42	YLFINSPGGWVVPGVALYDTMQF	10.12
ATP-dependent Clp protease proteolytic subunit	Pepsin	43	YLFINSPGGWVVPGVALYDTMQFVQPDVQTICMG	14.96
ATP-dependent Clp protease proteolytic subunit	Pepsin	44	LFINSPGGWVVPGVALYDTMQ	9.24
ATP-dependent Clp protease proteolytic subunit	Pepsin	45	LFINSPGGWVVPGVALYDTMQFVQPDVQTICMGL	14.96
ATP-dependent Clp protease proteolytic subunit	Pepsin	46	FINSPGGWVVPGVALYDTMQF	9.24
ATP-dependent Clp protease proteolytic subunit	Pepsin	47	FINSPGGWVVPGVALYDTMQFVQPDVQTICMG	14.08
ATP-dependent Clp protease proteolytic subunit	Pepsin	48	FINSPGGWVVPGVALYDTMQFVQPDVQTICMGLAASMGS	17.16
ATP-dependent Clp protease proteolytic subunit	Pepsin	49	GWVVPGVALYDTMQFVQPDVQTICMG	11.44
ATP-dependent Clp protease proteolytic subunit	Pepsin	50	GWVVPGVALYDTMQFVQPDVQTICMGLAASMGS	14.52
ATP-dependent Clp protease proteolytic subunit	Pepsin	51	GWVVPGVALYDTMQFVQPDVQTICMGLAASMGSFIL	15.84
ATP-dependent Clp protease proteolytic subunit	Pepsin	52	WVVPGVALYDTMQFVQPDVQTICMGL	11.44
ATP-dependent Clp protease proteolytic subunit	Pepsin	53	WVVPGVALYDTMQFVQPDVQTICMGLAASMGS	14.08
ATP-dependent Clp protease proteolytic subunit	Pepsin	54	WVVPGVALYDTMQFVQPDVQTICMGLAASMGSFI	14.96
ATP-dependent Clp protease proteolytic subunit	Pepsin	55	ALYDTMQFVQPDVQTICMGLAASMGSF	11.88
ATP-dependent Clp protease proteolytic subunit	Pepsin	56	ALYDTMQFVQPDVQTICMGLAASMGSFIL	12.76
ATP-dependent Clp protease proteolytic subunit	Pepsin	57	LYDTMQFVQPDVQTICMGLAASMGS	11
ATP-dependent Clp protease proteolytic subunit	Pepsin	58	LYDTMQFVQPDVQTICMGLAASMGSFI	11.88
ATP-dependent Clp protease proteolytic subunit	Pepsin	59	LYDTMQFVQPDVQTICMGLAASMGSFILVGGKITKRLAF	17.16
ATP-dependent Clp protease proteolytic subunit	Pepsin	60	YDTMQFVQPDVQTICMGLAASMGSF	11
ATP-dependent Clp protease proteolytic subunit	Pepsin	61	YDTMQFVQPDVQTICMGLAASMGSFIL	11.88
ATP-dependent Clp protease proteolytic subunit	Pepsin	62	YDTMQFVQPDVQTICMGLAASMGSFILVGGKITKRLAF	16.72
ATP-dependent Clp protease proteolytic subunit	Pepsin	63	QFVQPDVQTICMGLAASMGSFI	9.68
ATP-dependent Clp protease proteolytic subunit	Pepsin	64	QFVQPDVQTICMGLAASMGSFILVGGKITKRLAF	14.96
ATP-dependent Clp protease proteolytic subunit	Pepsin	65	FVQPDVQTICMGLAASMGSFIL	9.68
ATP-dependent Clp protease proteolytic subunit	Pepsin	66	FVQPDVQTICMGLAASMGSFILVGGKITKRLAF	14.52
ATP-dependent Clp protease proteolytic subunit	Pepsin	67	GLAASMGSFILVGGKITKRLAF	9.68
ATP-dependent Clp protease proteolytic subunit	Pepsin	68	GLAASMGSFILVGGKITKRLAFPHARVMIHQPASSFY	16.28
ATP-dependent Clp protease proteolytic subunit	Pepsin	69	LAASMGSFILVGGKITKRLAF	9.24
ATP-dependent Clp protease proteolytic subunit	Pepsin	70	LAASMGSFILVGGKITKRLAFPHARVMIHQPASSF	15.4
ATP-dependent Clp protease proteolytic subunit	Pepsin	71	SFILVGGKITKRLAFPHARVMIHQPASS	12.32
ATP-dependent Clp protease proteolytic subunit	Pepsin	72	SFILVGGKITKRLAFPHARVMIHQPASSFY	13.2
ATP-dependent Clp protease proteolytic subunit	Pepsin	73	SFILVGGKITKRLAFPHARVMIHQPASSFYEAQTGEVIL	17.16
ATP-dependent Clp protease proteolytic subunit	Pepsin	74	FILVGGKITKRLAFPHARVMIHQPASSF	12.32
ATP-dependent Clp protease proteolytic subunit	Pepsin	75	FILVGGKITKRLAFPHARVMIHQPASSFYEAQTGEVI	16.28
ATP-dependent Clp protease proteolytic subunit	Pepsin	76	ILVGGKITKRLAFPHARVMIHQPASS	11.44
ATP-dependent Clp protease proteolytic subunit	Pepsin	77	ILVGGKITKRLAFPHARVMIHQPASSFY	12.32
ATP-dependent Clp protease proteolytic subunit	Pepsin	78	ILVGGKITKRLAFPHARVMIHQPASSFYEAQTGEVIL	16.28
ATP-dependent Clp protease proteolytic subunit	Pepsin	79	LVGGKITKRLAFPHARVMIHQPASS	11
ATP-dependent Clp protease proteolytic subunit	Pepsin	80	LVGGKITKRLAFPHARVMIHQPASSFY	11.88
ATP-dependent Clp protease proteolytic subunit	Pepsin	81	LVGGKITKRLAFPHARVMIHQPASSFYEAQTGEVI	15.4
ATP-dependent Clp protease proteolytic subunit	Pepsin	82	FPHARVMIHQPASSFYEAQTGEVI	10.56
ATP-dependent Clp protease proteolytic subunit	Pepsin	83	FPHARVMIHQPASSFYEAQTGEVILEAEE	12.76
ATP-dependent Clp protease proteolytic subunit	Pepsin	84	FPHARVMIHQPASSFYEAQTGEVILEAEELL	13.64
ATP-dependent Clp protease proteolytic subunit	Pepsin	85	FPHARVMIHQPASSFYEAQTGEVILEAEELLKL	14.52
ATP-dependent Clp protease proteolytic subunit	Pepsin	86	SFYEAQTGEVILEAEELLKLRETITRV	11.88
ATP-dependent Clp protease proteolytic subunit	Pepsin	87	SFYEAQTGEVILEAEELLKLRETITRVYVQRTGKPLW	16.28
ATP-dependent Clp protease proteolytic subunit	Pepsin	88	FYEAQTGEVILEAEELLKLRETITRVYVQRTGKP	14.96
ATP-dependent Clp protease proteolytic subunit	Pepsin	89	YEAQTGEVILEAEELLKLRETITRV	11
ATP-dependent Clp protease proteolytic subunit	Pepsin	90	YEAQTGEVILEAEELLKLRETITRVYVQRTGKPLW	15.4
ATP-dependent Clp protease proteolytic subunit	Pepsin	91	ILEAEELLKLRETITRVYVQRTGKP	11
ATP-dependent Clp protease proteolytic subunit	Pepsin	92	ILEAEELLKLRETITRVYVQRTGKPLWVVSEDMERDVF	16.72
ATP-dependent Clp protease proteolytic subunit	Pepsin	93	LEAEELLKLRETITRVYVQRTGKPLW	11.44
ATP-dependent Clp protease proteolytic subunit	Pepsin	94	LEAEELLKLRETITRVYVQRTGKPLWVVSEDMERDVF	16.28
ATP-dependent Clp protease proteolytic subunit	Pepsin	95	ELLKLRETITRVYVQRTGKPLW	9.68
ATP-dependent Clp protease proteolytic subunit	Pepsin	96	ELLKLRETITRVYVQRTGKPLWVVSEDMERDVF	14.52
ATP-dependent Clp protease proteolytic subunit	Pepsin	97	LLKLRETITRVYVQRTGKPLW	9.24
ATP-dependent Clp protease proteolytic subunit	Pepsin	98	LLKLRETITRVYVQRTGKPLWVVSEDMERDVF	14.08
ATP-dependent Clp protease proteolytic subunit	Pepsin	99	LKLRETITRVYVQRTGKPLWVVSEDMERDVF	13.64
ATP-dependent Clp protease proteolytic subunit	Pepsin	100	LKLRETITRVYVQRTGKPLWVVSEDMERDVFMSATEAQV	17.16
ATP-dependent Clp protease proteolytic subunit	Pepsin	101	KLRETITRVYVQRTGKPLWVVSEDMERDVF	13.2
ATP-dependent Clp protease proteolytic subunit	Pepsin	102	KLRETITRVYVQRTGKPLWVVSEDMERDVFMSATEAQVY	17.16
ATP-dependent Clp protease proteolytic subunit	Pepsin	103	LRETITRVYVQRTGKPLWVVSEDMERDVF	12.76
ATP-dependent Clp protease proteolytic subunit	Pepsin	104	LRETITRVYVQRTGKPLWVVSEDMERDVFMSATEAQV	16.28
ATP-dependent Clp protease proteolytic subunit	Pepsin	105	VYVQRTGKPLWVVSEDMERDVF	9.68
ATP-dependent Clp protease proteolytic subunit	Pepsin	106	VYVQRTGKPLWVVSEDMERDVFMSATEAQVY	13.64
ATP-dependent Clp protease proteolytic subunit	Pepsin	107	VYVQRTGKPLWVVSEDMERDVFMSATEAQVYGIVDL	15.84
ATP-dependent Clp protease proteolytic subunit	Pepsin	108	PLWVVSEDMERDVFMSATEAQV	9.68
ATP-dependent Clp protease proteolytic subunit	Pepsin	109	PLWVVSEDMERDVFMSATEAQVYGIVDL	12.32
ATP-dependent Clp protease proteolytic subunit	Pepsin	110	WVVSEDMERDVFMSATEAQVY	9.24
ATP-dependent Clp protease proteolytic subunit	Pepsin	111	WVVSEDMERDVFMSATEAQVYGIVD	11
ATP synthase subunit beta, chloroplastic	Trypsin	1	MRINPTTSGPGASVLEKKNLGR	9.68
ATP synthase subunit beta, chloroplastic	Trypsin	2	MRINPTTSGPGASVLEKKNLGRIIQIIGPVLDVAFPPGK	17.16
ATP synthase subunit beta, chloroplastic	Trypsin	3	RINPTTSGPGASVLEKKNLGR	9.24
ATP synthase subunit beta, chloroplastic	Trypsin	4	RINPTTSGPGASVLEKKNLGRIIQIIGPVLDVAFPPGK	16.72
ATP synthase subunit beta, chloroplastic	Trypsin	5	KKNLGRIIQIIGPVLDVAFPPGK	10.12
ATP synthase subunit beta, chloroplastic	Trypsin	6	KKNLGRIIQIIGPVLDVAFPPGKMPNIYNALVVK	14.96
ATP synthase subunit beta, chloroplastic	Trypsin	7	KKNLGRIIQIIGPVLDVAFPPGKMPNIYNALVVKGR	15.84
ATP synthase subunit beta, chloroplastic	Trypsin	8	KNLGRIIQIIGPVLDVAFPPGK	9.68
ATP synthase subunit beta, chloroplastic	Trypsin	9	KNLGRIIQIIGPVLDVAFPPGKMPNIYNALVVK	14.52
ATP synthase subunit beta, chloroplastic	Trypsin	10	KNLGRIIQIIGPVLDVAFPPGKMPNIYNALVVKGR	15.4
ATP synthase subunit beta, chloroplastic	Trypsin	11	RIIQIIGPVLDVAFPPGKMPNIYNALVVK	12.76
ATP synthase subunit beta, chloroplastic	Trypsin	12	RIIQIIGPVLDVAFPPGKMPNIYNALVVKGR	13.64
ATP synthase subunit beta, chloroplastic	Trypsin	13	KMPNIYNALVVKGRDTVGKPINVTCEVQQLLGNNR	15.4
ATP synthase subunit beta, chloroplastic	Trypsin	14	KMPNIYNALVVKGRDTVGKPINVTCEVQQLLGNNRVR	16.28
ATP synthase subunit beta, chloroplastic	Trypsin	15	KGRDTVGKPINVTCEVQQLLGNNR	10.56
ATP synthase subunit beta, chloroplastic	Trypsin	16	KGRDTVGKPINVTCEVQQLLGNNRVR	11.44
ATP synthase subunit beta, chloroplastic	Trypsin	17	KGRDTVGKPINVTCEVQQLLGNNRVRAVAMSATDGLTR	16.72
ATP synthase subunit beta, chloroplastic	Trypsin	18	RDTVGKPINVTCEVQQLLGNNR	9.68
ATP synthase subunit beta, chloroplastic	Trypsin	19	RDTVGKPINVTCEVQQLLGNNRVR	10.56
ATP synthase subunit beta, chloroplastic	Trypsin	20	RDTVGKPINVTCEVQQLLGNNRVRAVAMSATDGLTR	15.84
ATP synthase subunit beta, chloroplastic	Trypsin	21	RVRAVAMSATDGLTRGMEVIDTGAPLSVPVGGATLGR	16.28
ATP synthase subunit beta, chloroplastic	Trypsin	22	RAVAMSATDGLTRGMEVIDTGAPLSVPVGGATLGR	15.4
ATP synthase subunit beta, chloroplastic	Trypsin	23	RGMEVIDTGAPLSVPVGGATLGR	10.12
ATP synthase subunit beta, chloroplastic	Trypsin	24	RIFNVLGEPIDNLGPVDTRTTSPIHR	11.44
ATP synthase subunit beta, chloroplastic	Trypsin	25	RIFNVLGEPIDNLGPVDTRTTSPIHRSAPAFIQLDTK	16.28
ATP synthase subunit beta, chloroplastic	Trypsin	26	RTTSPIHRSAPAFIQLDTKLSIFETGIK	12.32
ATP synthase subunit beta, chloroplastic	Trypsin	27	RTTSPIHRSAPAFIQLDTKLSIFETGIKVVDLLAPYR	16.28
ATP synthase subunit beta, chloroplastic	Trypsin	28	RTTSPIHRSAPAFIQLDTKLSIFETGIKVVDLLAPYRR	16.72
ATP synthase subunit beta, chloroplastic	Trypsin	29	RSAPAFIQLDTKLSIFETGIK	9.24
ATP synthase subunit beta, chloroplastic	Trypsin	30	RSAPAFIQLDTKLSIFETGIKVVDLLAPYR	13.2
ATP synthase subunit beta, chloroplastic	Trypsin	31	RSAPAFIQLDTKLSIFETGIKVVDLLAPYRR	13.64
ATP synthase subunit beta, chloroplastic	Trypsin	32	RSAPAFIQLDTKLSIFETGIKVVDLLAPYRRGGK	14.96
ATP synthase subunit beta, chloroplastic	Trypsin	33	KLSIFETGIKVVDLLAPYRRGGK	10.12
ATP synthase subunit beta, chloroplastic	Trypsin	34	KLSIFETGIKVVDLLAPYRRGGKIGLFGGAGVGK	14.96
ATP synthase subunit beta, chloroplastic	Trypsin	35	KVVDLLAPYRRGGKIGLFGGAGVGK	11
ATP synthase subunit beta, chloroplastic	Trypsin	36	KVVDLLAPYRRGGKIGLFGGAGVGKTVLIMELINNIAK	16.72
ATP synthase subunit beta, chloroplastic	Trypsin	37	RRGGKIGLFGGAGVGKTVLIMELINNIAK	12.76
ATP synthase subunit beta, chloroplastic	Trypsin	38	RGGKIGLFGGAGVGKTVLIMELINNIAK	12.32
ATP synthase subunit beta, chloroplastic	Trypsin	39	KIGLFGGAGVGKTVLIMELINNIAK	11
ATP synthase subunit beta, chloroplastic	Trypsin	40	KIGLFGGAGVGKTVLIMELINNIAKAHGGVSVFGGVGER	17.16
ATP synthase subunit beta, chloroplastic	Trypsin	41	KTVLIMELINNIAKAHGGVSVFGGVGER	12.32
ATP synthase subunit beta, chloroplastic	Trypsin	42	KTVLIMELINNIAKAHGGVSVFGGVGERTR	13.2
ATP synthase subunit beta, chloroplastic	Trypsin	43	KAHGGVSVFGGVGERTREGNDLYMEMK	11.88
ATP synthase subunit beta, chloroplastic	Trypsin	44	RTREGNDLYMEMKESGVINEQNIAESK	11.88
ATP synthase subunit beta, chloroplastic	Trypsin	45	REGNDLYMEMKESGVINEQNIAESK	11
ATP synthase subunit beta, chloroplastic	Trypsin	46	KESGVINEQNIAESKVALVYGQMNEPPGAR	13.2
ATP synthase subunit beta, chloroplastic	Trypsin	47	KESGVINEQNIAESKVALVYGQMNEPPGARMR	14.08
ATP synthase subunit beta, chloroplastic	Trypsin	48	KVALVYGQMNEPPGARMRVGLTALTMAEYFR	13.64
ATP synthase subunit beta, chloroplastic	Trypsin	49	RMRVGLTALTMAEYFRDVNEQDVLLFIDNIFR	14.08
ATP synthase subunit beta, chloroplastic	Trypsin	50	RVGLTALTMAEYFRDVNEQDVLLFIDNIFR	13.2
ATP synthase subunit beta, chloroplastic	Trypsin	51	RDVNEQDVLLFIDNIFRFVQAGSEVSALLGR	13.64
ATP synthase subunit beta, chloroplastic	Trypsin	52	RFVQAGSEVSALLGRMPSAVGYQPTLSTEMGSLQER	15.84
ATP synthase subunit beta, chloroplastic	Trypsin	53	RMPSAVGYQPTLSTEMGSLQER	9.68
ATP synthase subunit beta, chloroplastic	Trypsin	54	RMPSAVGYQPTLSTEMGSLQERITSTK	11.88
ATP synthase subunit beta, chloroplastic	Trypsin	55	KEGSITSIQAVYVPADDLTDPAPATTFAHLDATTVLSR	16.72
ATP synthase subunit beta, chloroplastic	Trypsin	56	RGLAAKGIYPAVDPLDSTSTMLQPR	11
ATP synthase subunit beta, chloroplastic	Trypsin	57	RGLAAKGIYPAVDPLDSTSTMLQPRIVGEEHYETAQR	16.28
ATP synthase subunit beta, chloroplastic	Trypsin	58	RGLAAKGIYPAVDPLDSTSTMLQPRIVGEEHYETAQRVK	17.16
ATP synthase subunit beta, chloroplastic	Trypsin	59	KGIYPAVDPLDSTSTMLQPRIVGEEHYETAQR	14.08
ATP synthase subunit beta, chloroplastic	Trypsin	60	KGIYPAVDPLDSTSTMLQPRIVGEEHYETAQRVK	14.96
ATP synthase subunit beta, chloroplastic	Trypsin	61	KGIYPAVDPLDSTSTMLQPRIVGEEHYETAQRVKQTLQR	17.16
ATP synthase subunit beta, chloroplastic	Trypsin	62	RIVGEEHYETAQRVKQTLQRYK	9.68
ATP synthase subunit beta, chloroplastic	Trypsin	63	RVKQTLQRYKELQDIIAILGLDELSEEDR	12.76
ATP synthase subunit beta, chloroplastic	Trypsin	64	RVKQTLQRYKELQDIIAILGLDELSEEDRLTVAR	14.96
ATP synthase subunit beta, chloroplastic	Trypsin	65	RVKQTLQRYKELQDIIAILGLDELSEEDRLTVARAR	15.84
ATP synthase subunit beta, chloroplastic	Trypsin	66	RVKQTLQRYKELQDIIAILGLDELSEEDRLTVARARK	16.28
ATP synthase subunit beta, chloroplastic	Trypsin	67	KQTLQRYKELQDIIAILGLDELSEEDR	11.88
ATP synthase subunit beta, chloroplastic	Trypsin	68	KQTLQRYKELQDIIAILGLDELSEEDRLTVAR	14.08
ATP synthase subunit beta, chloroplastic	Trypsin	69	KQTLQRYKELQDIIAILGLDELSEEDRLTVARAR	14.96
ATP synthase subunit beta, chloroplastic	Trypsin	70	KQTLQRYKELQDIIAILGLDELSEEDRLTVARARK	15.4
ATP synthase subunit beta, chloroplastic	Trypsin	71	KQTLQRYKELQDIIAILGLDELSEEDRLTVARARKIER	16.72
ATP synthase subunit beta, chloroplastic	Trypsin	72	RYKELQDIIAILGLDELSEEDR	9.68
ATP synthase subunit beta, chloroplastic	Trypsin	73	RYKELQDIIAILGLDELSEEDRLTVAR	11.88
ATP synthase subunit beta, chloroplastic	Trypsin	74	RYKELQDIIAILGLDELSEEDRLTVARAR	12.76
ATP synthase subunit beta, chloroplastic	Trypsin	75	RYKELQDIIAILGLDELSEEDRLTVARARK	13.2
ATP synthase subunit beta, chloroplastic	Trypsin	76	RYKELQDIIAILGLDELSEEDRLTVARARKIER	14.52
ATP synthase subunit beta, chloroplastic	Trypsin	77	KELQDIIAILGLDELSEEDRLTVAR	11
ATP synthase subunit beta, chloroplastic	Trypsin	78	KELQDIIAILGLDELSEEDRLTVARAR	11.88
ATP synthase subunit beta, chloroplastic	Trypsin	79	KELQDIIAILGLDELSEEDRLTVARARK	12.32
ATP synthase subunit beta, chloroplastic	Trypsin	80	KELQDIIAILGLDELSEEDRLTVARARKIER	13.64
ATP synthase subunit beta, chloroplastic	Trypsin	81	RLTVARARKIERFLSQPFFVAEVFTGSPGK	13.2
ATP synthase subunit beta, chloroplastic	Trypsin	82	RLTVARARKIERFLSQPFFVAEVFTGSPGKYVGLAETIR	17.16
ATP synthase subunit beta, chloroplastic	Trypsin	83	RARKIERFLSQPFFVAEVFTGSPGK	11
ATP synthase subunit beta, chloroplastic	Trypsin	84	RARKIERFLSQPFFVAEVFTGSPGKYVGLAETIR	14.96
ATP synthase subunit beta, chloroplastic	Trypsin	85	RKIERFLSQPFFVAEVFTGSPGK	10.12
ATP synthase subunit beta, chloroplastic	Trypsin	86	RKIERFLSQPFFVAEVFTGSPGKYVGLAETIR	14.08
ATP synthase subunit beta, chloroplastic	Trypsin	87	KIERFLSQPFFVAEVFTGSPGK	9.68
ATP synthase subunit beta, chloroplastic	Trypsin	88	KIERFLSQPFFVAEVFTGSPGKYVGLAETIR	13.64
ATP synthase subunit beta, chloroplastic	Trypsin	89	RFLSQPFFVAEVFTGSPGKYVGLAETIR	12.32
ATP synthase subunit beta, chloroplastic	Trypsin	90	RGFQLILSGELDGLPEQAFYLVGNIDEATAK	13.64
ATP synthase subunit beta, chloroplastic	Pepsin	1	MRINPTTSGPGASVLEKKNLGRIIQIIGPVL	13.64
ATP synthase subunit beta, chloroplastic	Pepsin	2	VLEKKNLGRIIQIIGPVLDVAFPPGKMPNI	13.2
ATP synthase subunit beta, chloroplastic	Pepsin	3	VLEKKNLGRIIQIIGPVLDVAFPPGKMPNIY	13.64
ATP synthase subunit beta, chloroplastic	Pepsin	4	VLEKKNLGRIIQIIGPVLDVAFPPGKMPNIYNAL	14.96
ATP synthase subunit beta, chloroplastic	Pepsin	5	LEKKNLGRIIQIIGPVLDVAFPPGKMPNI	12.76
ATP synthase subunit beta, chloroplastic	Pepsin	6	LEKKNLGRIIQIIGPVLDVAFPPGKMPNIY	13.2
ATP synthase subunit beta, chloroplastic	Pepsin	7	LEKKNLGRIIQIIGPVLDVAFPPGKMPNIYNA	14.08
ATP synthase subunit beta, chloroplastic	Pepsin	8	LDVAFPPGKMPNIYNALVVKGRDTVGKPINVTCEVQQ	16.28
ATP synthase subunit beta, chloroplastic	Pepsin	9	LDVAFPPGKMPNIYNALVVKGRDTVGKPINVTCEVQQLL	17.16
ATP synthase subunit beta, chloroplastic	Pepsin	10	IYNALVVKGRDTVGKPINVTCEVQQ	11
ATP synthase subunit beta, chloroplastic	Pepsin	11	IYNALVVKGRDTVGKPINVTCEVQQL	11.44
ATP synthase subunit beta, chloroplastic	Pepsin	12	YNALVVKGRDTVGKPINVTCEVQQL	11
ATP synthase subunit beta, chloroplastic	Pepsin	13	YNALVVKGRDTVGKPINVTCEVQQLL	11.44
ATP synthase subunit beta, chloroplastic	Pepsin	14	ALVVKGRDTVGKPINVTCEVQQ	9.68
ATP synthase subunit beta, chloroplastic	Pepsin	15	ALVVKGRDTVGKPINVTCEVQQLL	10.56
ATP synthase subunit beta, chloroplastic	Pepsin	16	ALVVKGRDTVGKPINVTCEVQQLLGNNRVRAVAMSATDG	17.16
ATP synthase subunit beta, chloroplastic	Pepsin	17	LVVKGRDTVGKPINVTCEVQQ	9.24
ATP synthase subunit beta, chloroplastic	Pepsin	18	LVVKGRDTVGKPINVTCEVQQL	9.68
ATP synthase subunit beta, chloroplastic	Pepsin	19	LVVKGRDTVGKPINVTCEVQQLLGNNRVRAVAMSATDGL	17.16
ATP synthase subunit beta, chloroplastic	Pepsin	20	QLLGNNRVRAVAMSATDGLTRGMEVIDTGAP	13.64
ATP synthase subunit beta, chloroplastic	Pepsin	21	LLGNNRVRAVAMSATDGLTRGMEVIDTGAP	13.2
ATP synthase subunit beta, chloroplastic	Pepsin	22	LLGNNRVRAVAMSATDGLTRGMEVIDTGAPLSVPVGGAT	17.16
ATP synthase subunit beta, chloroplastic	Pepsin	23	LGNNRVRAVAMSATDGLTRGMEVIDTGAP	12.76
ATP synthase subunit beta, chloroplastic	Pepsin	24	LGNNRVRAVAMSATDGLTRGMEVIDTGAPLSVPVGGAT	16.72
ATP synthase subunit beta, chloroplastic	Pepsin	25	LGNNRVRAVAMSATDGLTRGMEVIDTGAPLSVPVGGATL	17.16
ATP synthase subunit beta, chloroplastic	Pepsin	26	GLTRGMEVIDTGAPLSVPVGGAT	10.12
ATP synthase subunit beta, chloroplastic	Pepsin	27	GLTRGMEVIDTGAPLSVPVGGATLGRIFNV	13.2
ATP synthase subunit beta, chloroplastic	Pepsin	28	GLTRGMEVIDTGAPLSVPVGGATLGRIFNVLGEPIDN	16.28
ATP synthase subunit beta, chloroplastic	Pepsin	29	LTRGMEVIDTGAPLSVPVGGATL	10.12
ATP synthase subunit beta, chloroplastic	Pepsin	30	LTRGMEVIDTGAPLSVPVGGATLGRI	11.44
ATP synthase subunit beta, chloroplastic	Pepsin	31	LTRGMEVIDTGAPLSVPVGGATLGRIFNVL	13.2
ATP synthase subunit beta, chloroplastic	Pepsin	32	LTRGMEVIDTGAPLSVPVGGATLGRIFNVLGEPIDN	15.84
ATP synthase subunit beta, chloroplastic	Pepsin	33	PLSVPVGGATLGRIFNVLGEPIDN	10.56
ATP synthase subunit beta, chloroplastic	Pepsin	34	TLGRIFNVLGEPIDNLGPVDTRTTSPIHRSAPAF	14.96
ATP synthase subunit beta, chloroplastic	Pepsin	35	TLGRIFNVLGEPIDNLGPVDTRTTSPIHRSAPAFIQ	15.84
ATP synthase subunit beta, chloroplastic	Pepsin	36	TLGRIFNVLGEPIDNLGPVDTRTTSPIHRSAPAFIQL	16.28
ATP synthase subunit beta, chloroplastic	Pepsin	37	LGRIFNVLGEPIDNLGPVDTRTTSPIHRSAPAF	14.52
ATP synthase subunit beta, chloroplastic	Pepsin	38	LGRIFNVLGEPIDNLGPVDTRTTSPIHRSAPAFIQL	15.84
ATP synthase subunit beta, chloroplastic	Pepsin	39	LGRIFNVLGEPIDNLGPVDTRTTSPIHRSAPAFIQLDTK	17.16
ATP synthase subunit beta, chloroplastic	Pepsin	40	IFNVLGEPIDNLGPVDTRTTSPIHRSAPAFIQ	14.08
ATP synthase subunit beta, chloroplastic	Pepsin	41	IFNVLGEPIDNLGPVDTRTTSPIHRSAPAFIQLDTKL	16.28
ATP synthase subunit beta, chloroplastic	Pepsin	42	IFNVLGEPIDNLGPVDTRTTSPIHRSAPAFIQLDTKLSI	17.16
ATP synthase subunit beta, chloroplastic	Pepsin	43	VLGEPIDNLGPVDTRTTSPIHRSAPAF	11.88
ATP synthase subunit beta, chloroplastic	Pepsin	44	VLGEPIDNLGPVDTRTTSPIHRSAPAFIQLDTK	14.52
ATP synthase subunit beta, chloroplastic	Pepsin	45	VLGEPIDNLGPVDTRTTSPIHRSAPAFIQLDTKLSIF	16.28
ATP synthase subunit beta, chloroplastic	Pepsin	46	LGEPIDNLGPVDTRTTSPIHRSAPAF	11.44
ATP synthase subunit beta, chloroplastic	Pepsin	47	LGEPIDNLGPVDTRTTSPIHRSAPAFIQL	12.76
ATP synthase subunit beta, chloroplastic	Pepsin	48	LGEPIDNLGPVDTRTTSPIHRSAPAFIQLDTKLSI	15.4
ATP synthase subunit beta, chloroplastic	Pepsin	49	NLGPVDTRTTSPIHRSAPAFIQ	9.68
ATP synthase subunit beta, chloroplastic	Pepsin	50	NLGPVDTRTTSPIHRSAPAFIQLDTKL	11.88
ATP synthase subunit beta, chloroplastic	Pepsin	51	NLGPVDTRTTSPIHRSAPAFIQLDTKLSIF	13.2
ATP synthase subunit beta, chloroplastic	Pepsin	52	NLGPVDTRTTSPIHRSAPAFIQLDTKLSIFETGIKVVDL	17.16
ATP synthase subunit beta, chloroplastic	Pepsin	53	FIQLDTKLSIFETGIKVVDLLAP	10.12
ATP synthase subunit beta, chloroplastic	Pepsin	54	FIQLDTKLSIFETGIKVVDLLAPYRRGGKIGLF	14.52
ATP synthase subunit beta, chloroplastic	Pepsin	55	QLDTKLSIFETGIKVVDLLAP	9.24
ATP synthase subunit beta, chloroplastic	Pepsin	56	QLDTKLSIFETGIKVVDLLAPYRRGGKIGLF	13.64
ATP synthase subunit beta, chloroplastic	Pepsin	57	LDTKLSIFETGIKVVDLLAPYRRGGKIGL	12.76
ATP synthase subunit beta, chloroplastic	Pepsin	58	LDTKLSIFETGIKVVDLLAPYRRGGKIGLF	13.2
ATP synthase subunit beta, chloroplastic	Pepsin	59	KLSIFETGIKVVDLLAPYRRGGKIGL	11.44
ATP synthase subunit beta, chloroplastic	Pepsin	60	KLSIFETGIKVVDLLAPYRRGGKIGLFGGAGVGKTVL	16.28
ATP synthase subunit beta, chloroplastic	Pepsin	61	LSIFETGIKVVDLLAPYRRGGKIGLF	11.44
ATP synthase subunit beta, chloroplastic	Pepsin	62	LSIFETGIKVVDLLAPYRRGGKIGLFGGAGVGKTVL	15.84
ATP synthase subunit beta, chloroplastic	Pepsin	63	LSIFETGIKVVDLLAPYRRGGKIGLFGGAGVGKTVLIME	17.16
ATP synthase subunit beta, chloroplastic	Pepsin	64	IFETGIKVVDLLAPYRRGGKIGL	10.12
ATP synthase subunit beta, chloroplastic	Pepsin	65	IFETGIKVVDLLAPYRRGGKIGLFGGAGVGKTVL	14.96
ATP synthase subunit beta, chloroplastic	Pepsin	66	IFETGIKVVDLLAPYRRGGKIGLFGGAGVGKTVLIMEL	16.72
ATP synthase subunit beta, chloroplastic	Pepsin	67	FETGIKVVDLLAPYRRGGKIGLF	10.12
ATP synthase subunit beta, chloroplastic	Pepsin	68	FETGIKVVDLLAPYRRGGKIGLFGGAGVGKTVL	14.52
ATP synthase subunit beta, chloroplastic	Pepsin	69	FETGIKVVDLLAPYRRGGKIGLFGGAGVGKTVLIME	15.84
ATP synthase subunit beta, chloroplastic	Pepsin	70	DLLAPYRRGGKIGLFGGAGVGKTVLIMEL	12.76
ATP synthase subunit beta, chloroplastic	Pepsin	71	LLAPYRRGGKIGLFGGAGVGKTVL	10.56
ATP synthase subunit beta, chloroplastic	Pepsin	72	LLAPYRRGGKIGLFGGAGVGKTVLIMEL	12.32
ATP synthase subunit beta, chloroplastic	Pepsin	73	PYRRGGKIGLFGGAGVGKTVL	9.24
ATP synthase subunit beta, chloroplastic	Pepsin	74	PYRRGGKIGLFGGAGVGKTVLIME	10.56
ATP synthase subunit beta, chloroplastic	Pepsin	75	PYRRGGKIGLFGGAGVGKTVLIMELINNIAKAHGGVSVF	17.16
ATP synthase subunit beta, chloroplastic	Pepsin	76	LFGGAGVGKTVLIMELINNIAKAHGGVSV	12.76
ATP synthase subunit beta, chloroplastic	Pepsin	77	FGGAGVGKTVLIMELINNIAKAHGGVSVF	12.76
ATP synthase subunit beta, chloroplastic	Pepsin	78	LIMELINNIAKAHGGVSVFGGVGERTREGND	13.64
ATP synthase subunit beta, chloroplastic	Pepsin	79	LIMELINNIAKAHGGVSVFGGVGERTREGNDLY	14.52
ATP synthase subunit beta, chloroplastic	Pepsin	80	ELINNIAKAHGGVSVFGGVGERTREGND	12.32
ATP synthase subunit beta, chloroplastic	Pepsin	81	ELINNIAKAHGGVSVFGGVGERTREGNDL	12.76
ATP synthase subunit beta, chloroplastic	Pepsin	82	LINNIAKAHGGVSVFGGVGERTREGND	11.88
ATP synthase subunit beta, chloroplastic	Pepsin	83	LINNIAKAHGGVSVFGGVGERTREGNDLY	12.76
ATP synthase subunit beta, chloroplastic	Pepsin	84	VFGGVGERTREGNDLYMEMKESGVINEQNIAESKVAL	16.28
ATP synthase subunit beta, chloroplastic	Pepsin	85	VFGGVGERTREGNDLYMEMKESGVINEQNIAESKVALV	16.72
ATP synthase subunit beta, chloroplastic	Pepsin	86	FGGVGERTREGNDLYMEMKESGVINEQNIAESKVAL	15.84
ATP synthase subunit beta, chloroplastic	Pepsin	87	FGGVGERTREGNDLYMEMKESGVINEQNIAESKVALVY	16.72
ATP synthase subunit beta, chloroplastic	Pepsin	88	DLYMEMKESGVINEQNIAESKVAL	10.56
ATP synthase subunit beta, chloroplastic	Pepsin	89	DLYMEMKESGVINEQNIAESKVALV	11
ATP synthase subunit beta, chloroplastic	Pepsin	90	LYMEMKESGVINEQNIAESKVALV	10.56
ATP synthase subunit beta, chloroplastic	Pepsin	91	LYMEMKESGVINEQNIAESKVALVY	11
ATP synthase subunit beta, chloroplastic	Pepsin	92	YMEMKESGVINEQNIAESKVAL	9.68
ATP synthase subunit beta, chloroplastic	Pepsin	93	YMEMKESGVINEQNIAESKVALVY	10.56
ATP synthase subunit beta, chloroplastic	Pepsin	94	YMEMKESGVINEQNIAESKVALVYGQMNEPPGARMRVGL	17.16
ATP synthase subunit beta, chloroplastic	Pepsin	95	LVYGQMNEPPGARMRVGLTAL	9.24
ATP synthase subunit beta, chloroplastic	Pepsin	96	LVYGQMNEPPGARMRVGLTALTMAEYF	11.88
ATP synthase subunit beta, chloroplastic	Pepsin	97	LVYGQMNEPPGARMRVGLTALTMAEYFRDVNEQDVLLF	16.72
ATP synthase subunit beta, chloroplastic	Pepsin	98	VYGQMNEPPGARMRVGLTALTMAE	10.56
ATP synthase subunit beta, chloroplastic	Pepsin	99	VYGQMNEPPGARMRVGLTALTMAEYFRDVNEQDV	14.96
ATP synthase subunit beta, chloroplastic	Pepsin	100	VYGQMNEPPGARMRVGLTALTMAEYFRDVNEQDVLL	15.84
ATP synthase subunit beta, chloroplastic	Pepsin	101	YGQMNEPPGARMRVGLTALTMAEY	10.56
ATP synthase subunit beta, chloroplastic	Pepsin	102	YGQMNEPPGARMRVGLTALTMAEYFRDVNEQDV	14.52
ATP synthase subunit beta, chloroplastic	Pepsin	103	YGQMNEPPGARMRVGLTALTMAEYFRDVNEQDVLLF	15.84
ATP synthase subunit beta, chloroplastic	Pepsin	104	LTALTMAEYFRDVNEQDVLLF	9.24
ATP synthase subunit beta, chloroplastic	Pepsin	105	LTALTMAEYFRDVNEQDVLLFIDNIFRF	12.32
ATP synthase subunit beta, chloroplastic	Pepsin	106	LTALTMAEYFRDVNEQDVLLFIDNIFRFVQAGSEVSA	16.28
ATP synthase subunit beta, chloroplastic	Pepsin	107	LTALTMAEYFRDVNEQDVLLFIDNIFRFVQAGSEVSALL	17.16
ATP synthase subunit beta, chloroplastic	Pepsin	108	ALTMAEYFRDVNEQDVLLFIDNIF	10.56
ATP synthase subunit beta, chloroplastic	Pepsin	109	ALTMAEYFRDVNEQDVLLFIDNIFRF	11.44
ATP synthase subunit beta, chloroplastic	Pepsin	110	ALTMAEYFRDVNEQDVLLFIDNIFRFVQAGSEVSALL	16.28
ATP synthase subunit beta, chloroplastic	Pepsin	111	LTMAEYFRDVNEQDVLLFIDNI	9.68
ATP synthase subunit beta, chloroplastic	Pepsin	112	LTMAEYFRDVNEQDVLLFIDNIFRF	11
ATP synthase subunit beta, chloroplastic	Pepsin	113	LTMAEYFRDVNEQDVLLFIDNIFRFVQAGSEVSAL	15.4
ATP synthase subunit beta, chloroplastic	Pepsin	114	EYFRDVNEQDVLLFIDNIFRF	9.24
ATP synthase subunit beta, chloroplastic	Pepsin	115	EYFRDVNEQDVLLFIDNIFRFVQAGSEVSALL	14.08
ATP synthase subunit beta, chloroplastic	Pepsin	116	YFRDVNEQDVLLFIDNIFRFVQAGSEVSA	12.76
ATP synthase subunit beta, chloroplastic	Pepsin	117	YFRDVNEQDVLLFIDNIFRFVQAGSEVSALLGRMPSAVG	17.16
ATP synthase subunit beta, chloroplastic	Pepsin	118	FRDVNEQDVLLFIDNIFRFVQAGSEVSAL	12.76
ATP synthase subunit beta, chloroplastic	Pepsin	119	FRDVNEQDVLLFIDNIFRFVQAGSEVSALLGRMPSAVG	16.72
ATP synthase subunit beta, chloroplastic	Pepsin	120	VLLFIDNIFRFVQAGSEVSALL	9.68
ATP synthase subunit beta, chloroplastic	Pepsin	121	VLLFIDNIFRFVQAGSEVSALLGRMPSAVGYQPTL	15.4
ATP synthase subunit beta, chloroplastic	Pepsin	122	LLFIDNIFRFVQAGSEVSALL	9.24
ATP synthase subunit beta, chloroplastic	Pepsin	123	LLFIDNIFRFVQAGSEVSALLGRMPSAVG	12.76
ATP synthase subunit beta, chloroplastic	Pepsin	124	LFIDNIFRFVQAGSEVSALLGRMPSAVGYQPTL	14.52
ATP synthase subunit beta, chloroplastic	Pepsin	125	LFIDNIFRFVQAGSEVSALLGRMPSAVGYQPTLSTEMGS	17.16
ATP synthase subunit beta, chloroplastic	Pepsin	126	FIDNIFRFVQAGSEVSALLGRMPSAVG	11.88
ATP synthase subunit beta, chloroplastic	Pepsin	127	FIDNIFRFVQAGSEVSALLGRMPSAVGYQPTLSTEMGSL	17.16
ATP synthase subunit beta, chloroplastic	Pepsin	128	IFRFVQAGSEVSALLGRMPSAVGYQPTL	12.32
ATP synthase subunit beta, chloroplastic	Pepsin	129	IFRFVQAGSEVSALLGRMPSAVGYQPTLSTEMGS	14.96
ATP synthase subunit beta, chloroplastic	Pepsin	130	FRFVQAGSEVSALLGRMPSAVG	9.68
ATP synthase subunit beta, chloroplastic	Pepsin	131	FRFVQAGSEVSALLGRMPSAVGYQPTLSTEMGSL	14.96
ATP synthase subunit beta, chloroplastic	Pepsin	132	FVQAGSEVSALLGRMPSAVGYQPTL	11
ATP synthase subunit beta, chloroplastic	Pepsin	133	FVQAGSEVSALLGRMPSAVGYQPTLSTEMGS	13.64
ATP synthase subunit beta, chloroplastic	Pepsin	134	ALLGRMPSAVGYQPTLSTEMGS	9.68
ATP synthase subunit beta, chloroplastic	Pepsin	135	ALLGRMPSAVGYQPTLSTEMGSL	10.12
ATP synthase subunit beta, chloroplastic	Pepsin	136	LLGRMPSAVGYQPTLSTEMGS	9.24
ATP synthase subunit beta, chloroplastic	Pepsin	137	LLGRMPSAVGYQPTLSTEMGSL	9.68
ATP synthase subunit beta, chloroplastic	Pepsin	138	LGRMPSAVGYQPTLSTEMGSL	9.24
ATP synthase subunit beta, chloroplastic	Pepsin	139	LGRMPSAVGYQPTLSTEMGSLQERITSTKEGSITSIQAV	17.16
ATP synthase subunit beta, chloroplastic	Pepsin	140	GYQPTLSTEMGSLQERITSTKEGSITSIQAVYVPADD	16.28
ATP synthase subunit beta, chloroplastic	Pepsin	141	GYQPTLSTEMGSLQERITSTKEGSITSIQAVYVPADDL	16.72
ATP synthase subunit beta, chloroplastic	Pepsin	142	LSTEMGSLQERITSTKEGSITSIQAV	11.44
ATP synthase subunit beta, chloroplastic	Pepsin	143	LSTEMGSLQERITSTKEGSITSIQAVYVPADD	14.08
ATP synthase subunit beta, chloroplastic	Pepsin	144	SLQERITSTKEGSITSIQAVYVPADDL	11.88
ATP synthase subunit beta, chloroplastic	Pepsin	145	SLQERITSTKEGSITSIQAVYVPADDLTDPAPATT	15.4
ATP synthase subunit beta, chloroplastic	Pepsin	146	SLQERITSTKEGSITSIQAVYVPADDLTDPAPATTFAHL	17.16
ATP synthase subunit beta, chloroplastic	Pepsin	147	LQERITSTKEGSITSIQAVYVPADD	11
ATP synthase subunit beta, chloroplastic	Pepsin	148	LQERITSTKEGSITSIQAVYVPADDLTDPAPATTF	15.4
ATP synthase subunit beta, chloroplastic	Pepsin	149	LQERITSTKEGSITSIQAVYVPADDLTDPAPATTFAH	16.28
ATP synthase subunit beta, chloroplastic	Pepsin	150	VYVPADDLTDPAPATTFAHLDATTV	11
ATP synthase subunit beta, chloroplastic	Pepsin	151	VYVPADDLTDPAPATTFAHLDATTVLSRGLAAKGIY	15.84
ATP synthase subunit beta, chloroplastic	Pepsin	152	DLTDPAPATTFAHLDATTVLSRG	10.12
ATP synthase subunit beta, chloroplastic	Pepsin	153	DLTDPAPATTFAHLDATTVLSRGLAAKGIYPAVDP	15.4
ATP synthase subunit beta, chloroplastic	Pepsin	154	LTDPAPATTFAHLDATTVLSRG	9.68
ATP synthase subunit beta, chloroplastic	Pepsin	155	LTDPAPATTFAHLDATTVLSRGLAAKGIY	12.76
ATP synthase subunit beta, chloroplastic	Pepsin	156	TFAHLDATTVLSRGLAAKGIY	9.24
ATP synthase subunit beta, chloroplastic	Pepsin	157	TFAHLDATTVLSRGLAAKGIYPAVDPLDSTSTM	14.52
ATP synthase subunit beta, chloroplastic	Pepsin	158	FAHLDATTVLSRGLAAKGIYPAVDP	11
ATP synthase subunit beta, chloroplastic	Pepsin	159	FAHLDATTVLSRGLAAKGIYPAVDPLDSTSTM	14.08
ATP synthase subunit beta, chloroplastic	Pepsin	160	HLDATTVLSRGLAAKGIYPAVDP	10.12
ATP synthase subunit beta, chloroplastic	Pepsin	161	HLDATTVLSRGLAAKGIYPAVDPLDSTSTM	13.2
ATP synthase subunit beta, chloroplastic	Pepsin	162	LDATTVLSRGLAAKGIYPAVDP	9.68
ATP synthase subunit beta, chloroplastic	Pepsin	163	LDATTVLSRGLAAKGIYPAVDPLDSTSTMLQPRIVGEEH	17.16
ATP synthase subunit beta, chloroplastic	Pepsin	164	VLSRGLAAKGIYPAVDPLDSTSTM	10.56
ATP synthase subunit beta, chloroplastic	Pepsin	165	VLSRGLAAKGIYPAVDPLDSTSTMLQPRIVGEEHY	15.4
ATP synthase subunit beta, chloroplastic	Pepsin	166	LSRGLAAKGIYPAVDPLDSTSTM	10.12
ATP synthase subunit beta, chloroplastic	Pepsin	167	LSRGLAAKGIYPAVDPLDSTSTMLQPRIVGEEH	14.52
ATP synthase subunit beta, chloroplastic	Pepsin	168	GLAAKGIYPAVDPLDSTSTMLQPRIVGEEH	13.2
ATP synthase subunit beta, chloroplastic	Pepsin	169	YPAVDPLDSTSTMLQPRIVGEEHY	10.56
ATP synthase subunit beta, chloroplastic	Pepsin	170	YPAVDPLDSTSTMLQPRIVGEEHYETAQRVKQTL	14.96
ATP synthase subunit beta, chloroplastic	Pepsin	171	YPAVDPLDSTSTMLQPRIVGEEHYETAQRVKQTLQRYKE	17.16
ATP synthase subunit beta, chloroplastic	Pepsin	172	PLDSTSTMLQPRIVGEEHYETAQRVKQTL	12.76
ATP synthase subunit beta, chloroplastic	Pepsin	173	PLDSTSTMLQPRIVGEEHYETAQRVKQTLQRY	14.08
ATP synthase subunit beta, chloroplastic	Pepsin	174	MLQPRIVGEEHYETAQRVKQTLQRY	11
ATP synthase subunit beta, chloroplastic	Pepsin	175	MLQPRIVGEEHYETAQRVKQTLQRYKE	11.88
ATP synthase subunit beta, chloroplastic	Pepsin	176	MLQPRIVGEEHYETAQRVKQTLQRYKELQDIIAI	14.96
ATP synthase subunit beta, chloroplastic	Pepsin	177	MLQPRIVGEEHYETAQRVKQTLQRYKELQDIIAILGLDE	17.16
ATP synthase subunit beta, chloroplastic	Pepsin	178	HYETAQRVKQTLQRYKELQDIIAIL	11
ATP synthase subunit beta, chloroplastic	Pepsin	179	HYETAQRVKQTLQRYKELQDIIAILGLDEL	13.2
ATP synthase subunit beta, chloroplastic	Pepsin	180	HYETAQRVKQTLQRYKELQDIIAILGLDELSEEDRL	15.84
ATP synthase subunit beta, chloroplastic	Pepsin	181	YETAQRVKQTLQRYKELQDIIAI	10.12
ATP synthase subunit beta, chloroplastic	Pepsin	182	YETAQRVKQTLQRYKELQDIIAILGLDE	12.32
ATP synthase subunit beta, chloroplastic	Pepsin	183	YETAQRVKQTLQRYKELQDIIAILGLDELSEEDRL	15.4
ATP synthase subunit beta, chloroplastic	Pepsin	184	LQRYKELQDIIAILGLDELSEEDRL	11
ATP synthase subunit beta, chloroplastic	Pepsin	185	LQRYKELQDIIAILGLDELSEEDRLTVARARKIERF	15.84
ATP synthase subunit beta, chloroplastic	Pepsin	186	YKELQDIIAILGLDELSEEDRL	9.68
ATP synthase subunit beta, chloroplastic	Pepsin	187	YKELQDIIAILGLDELSEEDRLTVARARKIERF	14.52
ATP synthase subunit beta, chloroplastic	Pepsin	188	YKELQDIIAILGLDELSEEDRLTVARARKIERFLSQPFF	17.16
ATP synthase subunit beta, chloroplastic	Pepsin	189	ELQDIIAILGLDELSEEDRLTVARARKIERFLSQP	15.4
ATP synthase subunit beta, chloroplastic	Pepsin	190	ELQDIIAILGLDELSEEDRLTVARARKIERFLSQPFF	16.28
ATP synthase subunit beta, chloroplastic	Pepsin	191	ILGLDELSEEDRLTVARARKIERF	10.56
ATP synthase subunit beta, chloroplastic	Pepsin	192	ILGLDELSEEDRLTVARARKIERFLSQP	12.32
ATP synthase subunit beta, chloroplastic	Pepsin	193	ILGLDELSEEDRLTVARARKIERFLSQPFFVAEVF	15.4
ATP synthase subunit beta, chloroplastic	Pepsin	194	LGLDELSEEDRLTVARARKIERF	10.12
ATP synthase subunit beta, chloroplastic	Pepsin	195	LGLDELSEEDRLTVARARKIERFLSQPFF	12.76
ATP synthase subunit beta, chloroplastic	Pepsin	196	LGLDELSEEDRLTVARARKIERFLSQPFFVAEV	14.52
ATP synthase subunit beta, chloroplastic	Pepsin	197	GLDELSEEDRLTVARARKIERFLSQP	11.44
ATP synthase subunit beta, chloroplastic	Pepsin	198	GLDELSEEDRLTVARARKIERFLSQPFFVAEVF	14.52
ATP synthase subunit beta, chloroplastic	Pepsin	199	GLDELSEEDRLTVARARKIERFLSQPFFVAEVFTGSPGK	17.16
ATP synthase subunit beta, chloroplastic	Pepsin	200	LDELSEEDRLTVARARKIERFLSQPFF	11.88
ATP synthase subunit beta, chloroplastic	Pepsin	201	LDELSEEDRLTVARARKIERFLSQPFFVAEV	13.64
ATP synthase subunit beta, chloroplastic	Pepsin	202	LDELSEEDRLTVARARKIERFLSQPFFVAEVFTGSPGKY	17.16
ATP synthase subunit beta, chloroplastic	Pepsin	203	ELSEEDRLTVARARKIERFLSQP	10.12
ATP synthase subunit beta, chloroplastic	Pepsin	204	ELSEEDRLTVARARKIERFLSQPFFVAEVF	13.2
ATP synthase subunit beta, chloroplastic	Pepsin	205	ELSEEDRLTVARARKIERFLSQPFFVAEVFTGSPGKYVG	17.16
ATP synthase subunit beta, chloroplastic	Pepsin	206	LSEEDRLTVARARKIERFLSQPFF	10.56
ATP synthase subunit beta, chloroplastic	Pepsin	207	LSEEDRLTVARARKIERFLSQPFFVAEV	12.32
ATP synthase subunit beta, chloroplastic	Pepsin	208	LSEEDRLTVARARKIERFLSQPFFVAEVFTGSPGK	15.4
ATP synthase subunit beta, chloroplastic	Pepsin	209	LSEEDRLTVARARKIERFLSQPFFVAEVFTGSPGKYVGL	17.16
ATP synthase subunit beta, chloroplastic	Pepsin	210	LTVARARKIERFLSQPFFVAEVF	10.12
ATP synthase subunit beta, chloroplastic	Pepsin	211	LTVARARKIERFLSQPFFVAEVFTGSPGKY	13.2
ATP synthase subunit beta, chloroplastic	Pepsin	212	LTVARARKIERFLSQPFFVAEVFTGSPGKYVGLAETIRG	17.16
ATP synthase subunit beta, chloroplastic	Pepsin	213	FLSQPFFVAEVFTGSPGKYVG	9.24
ATP synthase subunit beta, chloroplastic	Pepsin	214	FLSQPFFVAEVFTGSPGKYVGLAETIRG	12.32
ATP synthase subunit beta, chloroplastic	Pepsin	215	FLSQPFFVAEVFTGSPGKYVGLAETIRGFQLI	14.08
ATP synthase subunit beta, chloroplastic	Pepsin	216	FLSQPFFVAEVFTGSPGKYVGLAETIRGFQLILSGEL	16.28
ATP synthase subunit beta, chloroplastic	Pepsin	217	PFFVAEVFTGSPGKYVGLAETIRGFQ	11.44
ATP synthase subunit beta, chloroplastic	Pepsin	218	PFFVAEVFTGSPGKYVGLAETIRGFQLIL	12.76
ATP synthase subunit beta, chloroplastic	Pepsin	219	PFFVAEVFTGSPGKYVGLAETIRGFQLILSGE	14.08
ATP synthase subunit beta, chloroplastic	Pepsin	220	PFFVAEVFTGSPGKYVGLAETIRGFQLILSGELDGL	15.84
ATP synthase subunit beta, chloroplastic	Pepsin	221	FVAEVFTGSPGKYVGLAETIRG	9.68
ATP synthase subunit beta, chloroplastic	Pepsin	222	FVAEVFTGSPGKYVGLAETIRGFQLIL	11.88
ATP synthase subunit beta, chloroplastic	Pepsin	223	FVAEVFTGSPGKYVGLAETIRGFQLILSGELDGL	14.96
ATP synthase subunit beta, chloroplastic	Pepsin	224	FVAEVFTGSPGKYVGLAETIRGFQLILSGELDGLPEQAF	17.16
ATP synthase subunit beta, chloroplastic	Pepsin	225	VFTGSPGKYVGLAETIRGFQL	9.24
ATP synthase subunit beta, chloroplastic	Pepsin	226	VFTGSPGKYVGLAETIRGFQLILSGEL	11.88
ATP synthase subunit beta, chloroplastic	Pepsin	227	VFTGSPGKYVGLAETIRGFQLILSGELDGLPEQA	14.96
ATP synthase subunit beta, chloroplastic	Pepsin	228	VFTGSPGKYVGLAETIRGFQLILSGELDGLPEQAFYL	16.28
ATP synthase subunit beta, chloroplastic	Pepsin	229	FTGSPGKYVGLAETIRGFQLI	9.24
ATP synthase subunit beta, chloroplastic	Pepsin	230	FTGSPGKYVGLAETIRGFQLILSGE	11
ATP synthase subunit beta, chloroplastic	Pepsin	231	FTGSPGKYVGLAETIRGFQLILSGELDGL	12.76
ATP synthase subunit beta, chloroplastic	Pepsin	232	FTGSPGKYVGLAETIRGFQLILSGELDGLPEQAFY	15.4
ATP synthase subunit beta, chloroplastic	Pepsin	233	KYVGLAETIRGFQLILSGELDGL	10.12
ATP synthase subunit beta, chloroplastic	Pepsin	234	KYVGLAETIRGFQLILSGELDGLPEQAF	12.32
ATP synthase subunit beta, chloroplastic	Pepsin	235	KYVGLAETIRGFQLILSGELDGLPEQAFYL	13.2
ATP synthase subunit beta, chloroplastic	Pepsin	236	YVGLAETIRGFQLILSGELDGL	9.68
ATP synthase subunit beta, chloroplastic	Pepsin	237	YVGLAETIRGFQLILSGELDGLPEQAFY	12.32
ATP synthase subunit beta, chloroplastic	Pepsin	238	GLAETIRGFQLILSGELDGLPEQA	10.56
ATP synthase subunit beta, chloroplastic	Pepsin	239	GLAETIRGFQLILSGELDGLPEQAFYL	11.88
ATP synthase subunit beta, chloroplastic	Pepsin	240	LAETIRGFQLILSGELDGLPEQAF	10.56
ATP synthase subunit beta, chloroplastic	Pepsin	241	LAETIRGFQLILSGELDGLPEQAFYLVGNIDEATAKAMN	17.16
ATP synthase subunit beta, chloroplastic	Pepsin	242	GFQLILSGELDGLPEQAFYLVGNIDEATAKAMNL	14.96
ATP synthase subunit beta, chloroplastic	Pepsin	243	GFQLILSGELDGLPEQAFYLVGNIDEATAKAMNLEMESN	17.16
ATP synthase subunit beta, chloroplastic	Pepsin	244	QLILSGELDGLPEQAFYLVGNIDEATAKAMN	13.64
ATP synthase subunit beta, chloroplastic	Pepsin	245	QLILSGELDGLPEQAFYLVGNIDEATAKAMNLEMESNL	16.72
ATP synthase subunit beta, chloroplastic	Pepsin	246	LILSGELDGLPEQAFYLVGNIDEATAKAMNL	13.64
ATP synthase subunit beta, chloroplastic	Pepsin	247	LILSGELDGLPEQAFYLVGNIDEATAKAMNLEMESN	15.84
ATP synthase subunit beta, chloroplastic	Pepsin	248	ILSGELDGLPEQAFYLVGNIDEATAKAMN	12.76
ATP synthase subunit beta, chloroplastic	Pepsin	249	ILSGELDGLPEQAFYLVGNIDEATAKAMNLEMESNL	15.84
ATP synthase subunit beta, chloroplastic	Pepsin	250	LSGELDGLPEQAFYLVGNIDEATAKAMNL	12.76
ATP synthase subunit beta, chloroplastic	Pepsin	251	LSGELDGLPEQAFYLVGNIDEATAKAMNLEMESN	14.96
ATP synthase subunit beta, chloroplastic	Pepsin	252	ELDGLPEQAFYLVGNIDEATAKAMN	11
ATP synthase subunit beta, chloroplastic	Pepsin	253	ELDGLPEQAFYLVGNIDEATAKAMNLEMESNL	14.08
ATP synthase subunit beta, chloroplastic	Pepsin	254	LDGLPEQAFYLVGNIDEATAKAMNL	11
ATP synthase subunit beta, chloroplastic	Pepsin	255	LDGLPEQAFYLVGNIDEATAKAMNLEMESN	13.2
ATP synthase subunit beta, chloroplastic	Pepsin	256	LPEQAFYLVGNIDEATAKAMN	9.24
ATP synthase subunit beta, chloroplastic	Pepsin	257	LPEQAFYLVGNIDEATAKAMNLEMESNL	12.32
ATP synthase subunit beta, chloroplastic	Pepsin	258	AFYLVGNIDEATAKAMNLEMESN	10.12
ATP synthase subunit beta, chloroplastic	Pepsin	259	AFYLVGNIDEATAKAMNLEMESNL	10.56
ATP synthase subunit beta, chloroplastic	Pepsin	260	FYLVGNIDEATAKAMNLEMESNL	10.12
ATP synthase subunit beta, chloroplastic	Pepsin	261	YLVGNIDEATAKAMNLEMESN	9.24
ATP synthase subunit beta, chloroplastic	Pepsin	262	LVGNIDEATAKAMNLEMESNL	9.24
ATP synthase subunit b, chloroplastic	Trypsin	1	KGVLSDLLDNRKQRILNTIRNSEELCGGAIEQLEK	15.4
ATP synthase subunit b, chloroplastic	Trypsin	2	KGVLSDLLDNRKQRILNTIRNSEELCGGAIEQLEKAR	16.28
ATP synthase subunit b, chloroplastic	Trypsin	3	KGVLSDLLDNRKQRILNTIRNSEELCGGAIEQLEKARAR	17.16
ATP synthase subunit b, chloroplastic	Trypsin	4	RKQRILNTIRNSEELCGGAIEQLEK	11
ATP synthase subunit b, chloroplastic	Trypsin	5	RKQRILNTIRNSEELCGGAIEQLEKAR	11.88
ATP synthase subunit b, chloroplastic	Trypsin	6	RKQRILNTIRNSEELCGGAIEQLEKARAR	12.76
ATP synthase subunit b, chloroplastic	Trypsin	7	RKQRILNTIRNSEELCGGAIEQLEKARARLR	13.64
ATP synthase subunit b, chloroplastic	Trypsin	8	RKQRILNTIRNSEELCGGAIEQLEKARARLRK	14.08
ATP synthase subunit b, chloroplastic	Trypsin	9	KQRILNTIRNSEELCGGAIEQLEK	10.56
ATP synthase subunit b, chloroplastic	Trypsin	10	KQRILNTIRNSEELCGGAIEQLEKAR	11.44
ATP synthase subunit b, chloroplastic	Trypsin	11	KQRILNTIRNSEELCGGAIEQLEKARAR	12.32
ATP synthase subunit b, chloroplastic	Trypsin	12	KQRILNTIRNSEELCGGAIEQLEKARARLR	13.2
ATP synthase subunit b, chloroplastic	Trypsin	13	KQRILNTIRNSEELCGGAIEQLEKARARLRK	13.64
ATP synthase subunit b, chloroplastic	Trypsin	14	RILNTIRNSEELCGGAIEQLEK	9.68
ATP synthase subunit b, chloroplastic	Trypsin	15	RILNTIRNSEELCGGAIEQLEKAR	10.56
ATP synthase subunit b, chloroplastic	Trypsin	16	RILNTIRNSEELCGGAIEQLEKARAR	11.44
ATP synthase subunit b, chloroplastic	Trypsin	17	RILNTIRNSEELCGGAIEQLEKARARLR	12.32
ATP synthase subunit b, chloroplastic	Trypsin	18	RILNTIRNSEELCGGAIEQLEKARARLRK	12.76
ATP synthase subunit b, chloroplastic	Trypsin	19	RILNTIRNSEELCGGAIEQLEKARARLRKVEMEADQFR	16.72
ATP synthase subunit b, chloroplastic	Trypsin	20	RNSEELCGGAIEQLEKARARLR	9.68
ATP synthase subunit b, chloroplastic	Trypsin	21	RNSEELCGGAIEQLEKARARLRK	10.12
ATP synthase subunit b, chloroplastic	Trypsin	22	RNSEELCGGAIEQLEKARARLRKVEMEADQFR	14.08
ATP synthase subunit b, chloroplastic	Trypsin	23	KARARLRKVEMEADQFRVNGYSEIER	11.44
ATP synthase subunit b, chloroplastic	Trypsin	24	KARARLRKVEMEADQFRVNGYSEIEREK	12.32
ATP synthase subunit b, chloroplastic	Trypsin	25	KARARLRKVEMEADQFRVNGYSEIEREKLNFINSTYK	16.28
ATP synthase subunit b, chloroplastic	Trypsin	26	RARLRKVEMEADQFRVNGYSEIER	10.56
ATP synthase subunit b, chloroplastic	Trypsin	27	RARLRKVEMEADQFRVNGYSEIEREK	11.44
ATP synthase subunit b, chloroplastic	Trypsin	28	RARLRKVEMEADQFRVNGYSEIEREKLNFINSTYK	15.4
ATP synthase subunit b, chloroplastic	Trypsin	29	RLRKVEMEADQFRVNGYSEIER	9.68
ATP synthase subunit b, chloroplastic	Trypsin	30	RLRKVEMEADQFRVNGYSEIEREK	10.56
ATP synthase subunit b, chloroplastic	Trypsin	31	RLRKVEMEADQFRVNGYSEIEREKLNFINSTYK	14.52
ATP synthase subunit b, chloroplastic	Trypsin	32	RKVEMEADQFRVNGYSEIEREK	9.68
ATP synthase subunit b, chloroplastic	Trypsin	33	RKVEMEADQFRVNGYSEIEREKLNFINSTYK	13.64
ATP synthase subunit b, chloroplastic	Trypsin	34	KVEMEADQFRVNGYSEIEREK	9.24
ATP synthase subunit b, chloroplastic	Trypsin	35	KVEMEADQFRVNGYSEIEREKLNFINSTYK	13.2
ATP synthase subunit b, chloroplastic	Trypsin	36	KVEMEADQFRVNGYSEIEREKLNFINSTYKTLEQLENYK	17.16
ATP synthase subunit b, chloroplastic	Trypsin	37	RVNGYSEIEREKLNFINSTYK	9.24
ATP synthase subunit b, chloroplastic	Trypsin	38	RVNGYSEIEREKLNFINSTYKTLEQLENYK	13.2
ATP synthase subunit b, chloroplastic	Trypsin	39	REKLNFINSTYKTLEQLENYK	9.24
ATP synthase subunit b, chloroplastic	Trypsin	40	REKLNFINSTYKTLEQLENYKNETIHFEQQR	13.64
ATP synthase subunit b, chloroplastic	Trypsin	41	REKLNFINSTYKTLEQLENYKNETIHFEQQRTINQVR	16.28
ATP synthase subunit b, chloroplastic	Trypsin	42	REKLNFINSTYKTLEQLENYKNETIHFEQQRTINQVRQR	17.16
ATP synthase subunit b, chloroplastic	Trypsin	43	KLNFINSTYKTLEQLENYKNETIHFEQQR	12.76
ATP synthase subunit b, chloroplastic	Trypsin	44	KLNFINSTYKTLEQLENYKNETIHFEQQRTINQVR	15.4
ATP synthase subunit b, chloroplastic	Trypsin	45	KLNFINSTYKTLEQLENYKNETIHFEQQRTINQVRQR	16.28
ATP synthase subunit b, chloroplastic	Trypsin	46	KTLEQLENYKNETIHFEQQRTINQVR	11.44
ATP synthase subunit b, chloroplastic	Trypsin	47	KTLEQLENYKNETIHFEQQRTINQVRQR	12.32
ATP synthase subunit b, chloroplastic	Trypsin	48	RTINQVRQRVFQQALQGALGTLNSCLNNELHLR	14.52
ATP synthase subunit b, chloroplastic	Trypsin	49	RQRVFQQALQGALGTLNSCLNNELHLR	11.88
ATP synthase subunit b, chloroplastic	Trypsin	50	RVFQQALQGALGTLNSCLNNELHLR	11
ATP synthase subunit b, chloroplastic	Trypsin	51	RVFQQALQGALGTLNSCLNNELHLRTISANIGMFGTMK	16.72
ATP synthase subunit b, chloroplastic	Pepsin	1	MKNVTDSFLSLGYWPSAGSFG	9.24
ATP synthase subunit b, chloroplastic	Pepsin	2	MKNVTDSFLSLGYWPSAGSFGFNTDI	11.44
ATP synthase subunit b, chloroplastic	Pepsin	3	MKNVTDSFLSLGYWPSAGSFGFNTDILATNPIN	14.52
ATP synthase subunit b, chloroplastic	Pepsin	4	MKNVTDSFLSLGYWPSAGSFGFNTDILATNPINLSVVF	16.72
ATP synthase subunit b, chloroplastic	Pepsin	5	SFLSLGYWPSAGSFGFNTDILATNPINL	12.32
ATP synthase subunit b, chloroplastic	Pepsin	6	SFLSLGYWPSAGSFGFNTDILATNPINLSVV	13.64
ATP synthase subunit b, chloroplastic	Pepsin	7	SFLSLGYWPSAGSFGFNTDILATNPINLSVVFGV	14.96
ATP synthase subunit b, chloroplastic	Pepsin	8	SFLSLGYWPSAGSFGFNTDILATNPINLSVVFGVLIFF	16.72
ATP synthase subunit b, chloroplastic	Pepsin	9	FLSLGYWPSAGSFGFNTDILATNPINL	11.88
ATP synthase subunit b, chloroplastic	Pepsin	10	FLSLGYWPSAGSFGFNTDILATNPINLSVV	13.2
ATP synthase subunit b, chloroplastic	Pepsin	11	FLSLGYWPSAGSFGFNTDILATNPINLSVVF	13.64
ATP synthase subunit b, chloroplastic	Pepsin	12	FLSLGYWPSAGSFGFNTDILATNPINLSVVFGVLIF	15.84
ATP synthase subunit b, chloroplastic	Pepsin	13	LSLGYWPSAGSFGFNTDILATNPIN	11
ATP synthase subunit b, chloroplastic	Pepsin	14	LSLGYWPSAGSFGFNTDILATNPINLSVVFGV	14.08
ATP synthase subunit b, chloroplastic	Pepsin	15	LSLGYWPSAGSFGFNTDILATNPINLSVVFGVLIFF	15.84
ATP synthase subunit b, chloroplastic	Pepsin	16	SLGYWPSAGSFGFNTDILATNPINL	11
ATP synthase subunit b, chloroplastic	Pepsin	17	SLGYWPSAGSFGFNTDILATNPINLSVV	12.32
ATP synthase subunit b, chloroplastic	Pepsin	18	SLGYWPSAGSFGFNTDILATNPINLSVVFGVLIF	14.96
ATP synthase subunit b, chloroplastic	Pepsin	19	LGYWPSAGSFGFNTDILATNPIN	10.12
ATP synthase subunit b, chloroplastic	Pepsin	20	LGYWPSAGSFGFNTDILATNPINLSVVF	12.32
ATP synthase subunit b, chloroplastic	Pepsin	21	LGYWPSAGSFGFNTDILATNPINLSVVFGVLI	14.08
ATP synthase subunit b, chloroplastic	Pepsin	22	LGYWPSAGSFGFNTDILATNPINLSVVFGVLIFFGKGVL	17.16
ATP synthase subunit b, chloroplastic	Pepsin	23	GYWPSAGSFGFNTDILATNPINL	10.12
ATP synthase subunit b, chloroplastic	Pepsin	24	GYWPSAGSFGFNTDILATNPINLSVV	11.44
ATP synthase subunit b, chloroplastic	Pepsin	25	GYWPSAGSFGFNTDILATNPINLSVVFGVL	13.2
ATP synthase subunit b, chloroplastic	Pepsin	26	GYWPSAGSFGFNTDILATNPINLSVVFGVLIFFGKGVL	16.72
ATP synthase subunit b, chloroplastic	Pepsin	27	WPSAGSFGFNTDILATNPINL	9.24
ATP synthase subunit b, chloroplastic	Pepsin	28	WPSAGSFGFNTDILATNPINLSVVFGV	11.88
ATP synthase subunit b, chloroplastic	Pepsin	29	WPSAGSFGFNTDILATNPINLSVVFGVLIFF	13.64
ATP synthase subunit b, chloroplastic	Pepsin	30	WPSAGSFGFNTDILATNPINLSVVFGVLIFFGKGVLSDL	17.16
ATP synthase subunit b, chloroplastic	Pepsin	31	SFGFNTDILATNPINLSVVFGVL	10.12
ATP synthase subunit b, chloroplastic	Pepsin	32	SFGFNTDILATNPINLSVVFGVLIFFGKGVL	13.64
ATP synthase subunit b, chloroplastic	Pepsin	33	SFGFNTDILATNPINLSVVFGVLIFFGKGVLSDLL	15.4
ATP synthase subunit b, chloroplastic	Pepsin	34	FGFNTDILATNPINLSVVFGVLI	10.12
ATP synthase subunit b, chloroplastic	Pepsin	35	FGFNTDILATNPINLSVVFGVLIF	10.56
ATP synthase subunit b, chloroplastic	Pepsin	36	FGFNTDILATNPINLSVVFGVLIFFGKGVLSDL	14.52
ATP synthase subunit b, chloroplastic	Pepsin	37	GFNTDILATNPINLSVVFGVL	9.24
ATP synthase subunit b, chloroplastic	Pepsin	38	GFNTDILATNPINLSVVFGVLIFF	10.56
ATP synthase subunit b, chloroplastic	Pepsin	39	GFNTDILATNPINLSVVFGVLIFFGKGVLSD	13.64
ATP synthase subunit b, chloroplastic	Pepsin	40	FNTDILATNPINLSVVFGVLI	9.24
ATP synthase subunit b, chloroplastic	Pepsin	41	FNTDILATNPINLSVVFGVLIFFGKGVL	12.32
ATP synthase subunit b, chloroplastic	Pepsin	42	FNTDILATNPINLSVVFGVLIFFGKGVLSDLL	14.08
ATP synthase subunit b, chloroplastic	Pepsin	43	FNTDILATNPINLSVVFGVLIFFGKGVLSDLLDNRKQRI	17.16
ATP synthase subunit b, chloroplastic	Pepsin	44	ILATNPINLSVVFGVLIFFGKGVL	10.56
ATP synthase subunit b, chloroplastic	Pepsin	45	ILATNPINLSVVFGVLIFFGKGVLSD	11.44
ATP synthase subunit b, chloroplastic	Pepsin	46	ILATNPINLSVVFGVLIFFGKGVLSDLLDNRKQRI	15.4
ATP synthase subunit b, chloroplastic	Pepsin	47	LATNPINLSVVFGVLIFFGKGVL	10.12
ATP synthase subunit b, chloroplastic	Pepsin	48	LATNPINLSVVFGVLIFFGKGVLSDLL	11.88
ATP synthase subunit b, chloroplastic	Pepsin	49	LATNPINLSVVFGVLIFFGKGVLSDLLDNRKQRI	14.96
ATP synthase subunit b, chloroplastic	Pepsin	50	NLSVVFGVLIFFGKGVLSDLLDNRKQRI	12.32
ATP synthase subunit b, chloroplastic	Pepsin	51	NLSVVFGVLIFFGKGVLSDLLDNRKQRILNTIRNSEEL	16.72
ATP synthase subunit b, chloroplastic	Pepsin	52	LSVVFGVLIFFGKGVLSDLLDNRKQRILNTIRNSEE	15.84
ATP synthase subunit b, chloroplastic	Pepsin	53	VFGVLIFFGKGVLSDLLDNRKQRI	10.56
ATP synthase subunit b, chloroplastic	Pepsin	54	VFGVLIFFGKGVLSDLLDNRKQRILNTIRNSEEL	14.96
ATP synthase subunit b, chloroplastic	Pepsin	55	FGVLIFFGKGVLSDLLDNRKQRILNTIRNSEE	14.08
ATP synthase subunit b, chloroplastic	Pepsin	56	VLIFFGKGVLSDLLDNRKQRILNTIRNSEEL	13.64
ATP synthase subunit b, chloroplastic	Pepsin	57	VLIFFGKGVLSDLLDNRKQRILNTIRNSEELCGGAIEQL	17.16
ATP synthase subunit b, chloroplastic	Pepsin	58	LIFFGKGVLSDLLDNRKQRILNTIRNSEELCGGAIEQ	16.28
ATP synthase subunit b, chloroplastic	Pepsin	59	IFFGKGVLSDLLDNRKQRILNTIRNSEE	12.32
ATP synthase subunit b, chloroplastic	Pepsin	60	IFFGKGVLSDLLDNRKQRILNTIRNSEELCGGAIEQL	16.28
ATP synthase subunit b, chloroplastic	Pepsin	61	FFGKGVLSDLLDNRKQRILNTIRNSEELCGGAIEQ	15.4
ATP synthase subunit b, chloroplastic	Pepsin	62	FGKGVLSDLLDNRKQRILNTIRNSEEL	11.88
ATP synthase subunit b, chloroplastic	Pepsin	63	FGKGVLSDLLDNRKQRILNTIRNSEELCGGAIEQL	15.4
ATP synthase subunit b, chloroplastic	Pepsin	64	LSDLLDNRKQRILNTIRNSEELCGGAIEQ	12.76
ATP synthase subunit b, chloroplastic	Pepsin	65	LSDLLDNRKQRILNTIRNSEELCGGAIEQLEKARARL	16.28
ATP synthase subunit b, chloroplastic	Pepsin	66	DLLDNRKQRILNTIRNSEELCGGAIEQLEKARARL	15.4
ATP synthase subunit b, chloroplastic	Pepsin	67	LLDNRKQRILNTIRNSEELCGGAIEQL	11.88
ATP synthase subunit b, chloroplastic	Pepsin	68	LLDNRKQRILNTIRNSEELCGGAIEQLEKARARL	14.96
ATP synthase subunit b, chloroplastic	Pepsin	69	LDNRKQRILNTIRNSEELCGGAIEQ	11
ATP synthase subunit b, chloroplastic	Pepsin	70	LDNRKQRILNTIRNSEELCGGAIEQLEKARARL	14.52
ATP synthase subunit b, chloroplastic	Pepsin	71	ILNTIRNSEELCGGAIEQLEKARARL	11.44
ATP synthase subunit b, chloroplastic	Pepsin	72	ILNTIRNSEELCGGAIEQLEKARARLRKVEMEADQF	15.84
ATP synthase subunit b, chloroplastic	Pepsin	73	ELCGGAIEQLEKARARLRKVEMEADQF	11.88
ATP synthase subunit b, chloroplastic	Pepsin	74	ELCGGAIEQLEKARARLRKVEMEADQFRVNGY	14.08
ATP synthase subunit b, chloroplastic	Pepsin	75	LCGGAIEQLEKARARLRKVEMEADQ	11
ATP synthase subunit b, chloroplastic	Pepsin	76	LCGGAIEQLEKARARLRKVEMEADQFRVNGYSEIEREKL	17.16
ATP synthase subunit b, chloroplastic	Pepsin	77	QLEKARARLRKVEMEADQFRVNG	10.12
ATP synthase subunit b, chloroplastic	Pepsin	78	QLEKARARLRKVEMEADQFRVNGYSEIEREKLNF	14.96
ATP synthase subunit b, chloroplastic	Pepsin	79	QLEKARARLRKVEMEADQFRVNGYSEIEREKLNFINSTY	17.16
ATP synthase subunit b, chloroplastic	Pepsin	80	LEKARARLRKVEMEADQFRVNGY	10.12
ATP synthase subunit b, chloroplastic	Pepsin	81	LEKARARLRKVEMEADQFRVNGYSEIEREKL	13.64
ATP synthase subunit b, chloroplastic	Pepsin	82	LEKARARLRKVEMEADQFRVNGYSEIEREKLNFINST	16.28
ATP synthase subunit b, chloroplastic	Pepsin	83	LRKVEMEADQFRVNGYSEIEREKLNF	11.44
ATP synthase subunit b, chloroplastic	Pepsin	84	LRKVEMEADQFRVNGYSEIEREKLNFINSTYKT	14.52
ATP synthase subunit b, chloroplastic	Pepsin	85	LRKVEMEADQFRVNGYSEIEREKLNFINSTYKTLEQLEN	17.16
ATP synthase subunit b, chloroplastic	Pepsin	86	QFRVNGYSEIEREKLNFINST	9.24
ATP synthase subunit b, chloroplastic	Pepsin	87	QFRVNGYSEIEREKLNFINSTYKTLEQ	11.88
ATP synthase subunit b, chloroplastic	Pepsin	88	QFRVNGYSEIEREKLNFINSTYKTLEQLENY	13.64
ATP synthase subunit b, chloroplastic	Pepsin	89	QFRVNGYSEIEREKLNFINSTYKTLEQLENYKNETIHF	16.72
ATP synthase subunit b, chloroplastic	Pepsin	90	FRVNGYSEIEREKLNFINSTY	9.24
ATP synthase subunit b, chloroplastic	Pepsin	91	FRVNGYSEIEREKLNFINSTYKTLEQLEN	12.76
ATP synthase subunit b, chloroplastic	Pepsin	92	FRVNGYSEIEREKLNFINSTYKTLEQLENYKNETIH	15.84
ATP synthase subunit b, chloroplastic	Pepsin	93	GYSEIEREKLNFINSTYKTLEQL	10.12
ATP synthase subunit b, chloroplastic	Pepsin	94	GYSEIEREKLNFINSTYKTLEQLENY	11.44
ATP synthase subunit b, chloroplastic	Pepsin	95	GYSEIEREKLNFINSTYKTLEQLENYKNETIHF	14.52
ATP synthase subunit b, chloroplastic	Pepsin	96	YSEIEREKLNFINSTYKTLEQ	9.24
ATP synthase subunit b, chloroplastic	Pepsin	97	YSEIEREKLNFINSTYKTLEQLEN	10.56
ATP synthase subunit b, chloroplastic	Pepsin	98	YSEIEREKLNFINSTYKTLEQLENYKNETIH	13.64
ATP synthase subunit b, chloroplastic	Pepsin	99	LNFINSTYKTLEQLENYKNETIHFEQQRTINQVRQRV	16.28
ATP synthase subunit b, chloroplastic	Pepsin	100	FINSTYKTLEQLENYKNETIHF	9.68
ATP synthase subunit b, chloroplastic	Pepsin	101	FINSTYKTLEQLENYKNETIHFEQQRTINQVRQRV	15.4
ATP synthase subunit b, chloroplastic	Pepsin	102	FINSTYKTLEQLENYKNETIHFEQQRTINQVRQRVFQQA	17.16
ATP synthase subunit b, chloroplastic	Pepsin	103	TYKTLEQLENYKNETIHFEQQRTINQVRQRVFQQAL	15.84
ATP synthase subunit b, chloroplastic	Pepsin	104	TYKTLEQLENYKNETIHFEQQRTINQVRQRVFQQALQGA	17.16
ATP synthase subunit b, chloroplastic	Pepsin	105	YKTLEQLENYKNETIHFEQQRTINQVRQRV	13.2
ATP synthase subunit b, chloroplastic	Pepsin	106	YKTLEQLENYKNETIHFEQQRTINQVRQRVFQQA	14.96
ATP synthase subunit b, chloroplastic	Pepsin	107	YKTLEQLENYKNETIHFEQQRTINQVRQRVFQQALQGAL	17.16
ATP synthase subunit b, chloroplastic	Pepsin	108	TLEQLENYKNETIHFEQQRTINQVRQRV	12.32
ATP synthase subunit b, chloroplastic	Pepsin	109	TLEQLENYKNETIHFEQQRTINQVRQRVFQQAL	14.52
ATP synthase subunit b, chloroplastic	Pepsin	110	TLEQLENYKNETIHFEQQRTINQVRQRVFQQALQGALGT	17.16
ATP synthase subunit b, chloroplastic	Pepsin	111	QLENYKNETIHFEQQRTINQVRQRV	11
ATP synthase subunit b, chloroplastic	Pepsin	112	QLENYKNETIHFEQQRTINQVRQRVFQQA	12.76
ATP synthase subunit b, chloroplastic	Pepsin	113	QLENYKNETIHFEQQRTINQVRQRVFQQALQGA	14.52
ATP synthase subunit b, chloroplastic	Pepsin	114	QLENYKNETIHFEQQRTINQVRQRVFQQALQGALGTL	16.28
ATP synthase subunit b, chloroplastic	Pepsin	115	LENYKNETIHFEQQRTINQVRQRVFQQAL	12.76
ATP synthase subunit b, chloroplastic	Pepsin	116	LENYKNETIHFEQQRTINQVRQRVFQQALQGAL	14.52
ATP synthase subunit b, chloroplastic	Pepsin	117	LENYKNETIHFEQQRTINQVRQRVFQQALQGALGTLNSC	17.16
ATP synthase subunit b, chloroplastic	Pepsin	118	NYKNETIHFEQQRTINQVRQRVFQQA	11.44
ATP synthase subunit b, chloroplastic	Pepsin	119	NYKNETIHFEQQRTINQVRQRVFQQALQGALGT	14.52
ATP synthase subunit b, chloroplastic	Pepsin	120	NYKNETIHFEQQRTINQVRQRVFQQALQGALGTLNSCL	16.72
ATP synthase subunit b, chloroplastic	Pepsin	121	YKNETIHFEQQRTINQVRQRV	9.24
ATP synthase subunit b, chloroplastic	Pepsin	122	YKNETIHFEQQRTINQVRQRVFQQALQGAL	13.2
ATP synthase subunit b, chloroplastic	Pepsin	123	YKNETIHFEQQRTINQVRQRVFQQALQGALGTLNSC	15.84
ATP synthase subunit b, chloroplastic	Pepsin	124	HFEQQRTINQVRQRVFQQALQGALGTL	11.88
ATP synthase subunit b, chloroplastic	Pepsin	125	HFEQQRTINQVRQRVFQQALQGALGTLNSCLNNE	14.96
ATP synthase subunit b, chloroplastic	Pepsin	126	HFEQQRTINQVRQRVFQQALQGALGTLNSCLNNELHL	16.28
ATP synthase subunit b, chloroplastic	Pepsin	127	FEQQRTINQVRQRVFQQALQGAL	10.12
ATP synthase subunit b, chloroplastic	Pepsin	128	FEQQRTINQVRQRVFQQALQGALGTLNSCL	13.2
ATP synthase subunit b, chloroplastic	Pepsin	129	FEQQRTINQVRQRVFQQALQGALGTLNSCLNNELH	15.4
ATP synthase subunit b, chloroplastic	Pepsin	130	VFQQALQGALGTLNSCLNNEL	9.24
ATP synthase subunit b, chloroplastic	Pepsin	131	VFQQALQGALGTLNSCLNNELHLRTISANIGMF	14.52
ATP synthase subunit b, chloroplastic	Pepsin	132	ALQGALGTLNSCLNNELHLRTISANIGM	12.32
ATP synthase subunit b, chloroplastic	Pepsin	133	LQGALGTLNSCLNNELHLRTISANIGMF	12.32
ATP synthase subunit b, chloroplastic	Pepsin	134	ALGTLNSCLNNELHLRTISANIGM	10.56
ATP synthase subunit b, chloroplastic	Pepsin	135	LGTLNSCLNNELHLRTISANIGMF	10.56
ATP synthase subunit b, chloroplastic	Pepsin	136	TLNSCLNNELHLRTISANIGMF	9.68
ATP synthase subunit b, chloroplastic	Pepsin	137	LNSCLNNELHLRTISANIGMF	9.24
Photosystem II D2 protein	Trypsin	1	MTIALGKFTKDENDLFDIMDDWLR	10.56
Photosystem II D2 protein	Trypsin	2	MTIALGKFTKDENDLFDIMDDWLRR	11
Photosystem II D2 protein	Trypsin	3	MTIALGKFTKDENDLFDIMDDWLRRDR	11.88
Photosystem II D2 protein	Trypsin	4	KFTKDENDLFDIMDDWLRRDR	9.24
Photosystem II D2 protein	Trypsin	5	RWCQLGGLWTFVALHGAFGLIGFMLR	11.44
Photosystem II D2 protein	Trypsin	6	RWCQLGGLWTFVALHGAFGLIGFMLRQFELAR	14.08
Photosystem II D2 protein	Trypsin	7	RAFNPTQAEETYSMVTANRFWSQIFGVAFSNK	14.08
Photosystem II D2 protein	Trypsin	8	RAFNPTQAEETYSMVTANRFWSQIFGVAFSNKR	14.52
Photosystem II D2 protein	Trypsin	9	KRWLHFFMLFVPVTGLWMSALGVVGLALNLR	13.64
Photosystem II D2 protein	Trypsin	10	RWLHFFMLFVPVTGLWMSALGVVGLALNLR	13.2
Photosystem II D2 protein	Trypsin	11	RWLHFFMLFVPVTGLWMSALGVVGLALNLRAYDFVSQEIR	17.6
Photosystem II D2 protein	Trypsin	12	RAYDFVSQEIRAAEDPEFETFYTK	10.56
Photosystem II D2 protein	Trypsin	13	RAYDFVSQEIRAAEDPEFETFYTKNILLNEGIR	14.52
Photosystem II D2 protein	Trypsin	14	RAAEDPEFETFYTKNILLNEGIR	10.12
Photosystem II D2 protein	Trypsin	15	KNILLNEGIRAWMAAQDQPHENLIFPEEVLPR	14.08
Photosystem II D2 protein	Trypsin	16	RAWMAAQDQPHENLIFPEEVLPR	10.12
Photosystem II D2 protein	Pepsin	1	MTIALGKFTKDENDLFDIMDD	9.24
Photosystem II D2 protein	Pepsin	2	MTIALGKFTKDENDLFDIMDDWLRRDRF	12.32
Photosystem II D2 protein	Pepsin	3	MTIALGKFTKDENDLFDIMDDWLRRDRFVFVGW	14.52
Photosystem II D2 protein	Pepsin	4	MTIALGKFTKDENDLFDIMDDWLRRDRFVFVGWSGLLLF	17.16
Photosystem II D2 protein	Pepsin	5	ALGKFTKDENDLFDIMDDWLRRDRF	11
Photosystem II D2 protein	Pepsin	6	ALGKFTKDENDLFDIMDDWLRRDRFVFVG	12.76
Photosystem II D2 protein	Pepsin	7	ALGKFTKDENDLFDIMDDWLRRDRFVFVGWSGL	14.52
Photosystem II D2 protein	Pepsin	8	ALGKFTKDENDLFDIMDDWLRRDRFVFVGWSGLLLFPCA	17.16
Photosystem II D2 protein	Pepsin	9	LGKFTKDENDLFDIMDDWLRRDRFVFVGW	12.76
Photosystem II D2 protein	Pepsin	10	LGKFTKDENDLFDIMDDWLRRDRFVFVGWSGLL	14.52
Photosystem II D2 protein	Pepsin	11	LGKFTKDENDLFDIMDDWLRRDRFVFVGWSGLLLFPCAY	17.16
Photosystem II D2 protein	Pepsin	12	KFTKDENDLFDIMDDWLRRDRFVF	10.56
Photosystem II D2 protein	Pepsin	13	KFTKDENDLFDIMDDWLRRDRFVFVGWSG	12.76
Photosystem II D2 protein	Pepsin	14	KFTKDENDLFDIMDDWLRRDRFVFVGWSGLLLF	14.52
Photosystem II D2 protein	Pepsin	15	KFTKDENDLFDIMDDWLRRDRFVFVGWSGLLLFPCAYFA	17.16
Photosystem II D2 protein	Pepsin	16	FTKDENDLFDIMDDWLRRDRF	9.24
Photosystem II D2 protein	Pepsin	17	FTKDENDLFDIMDDWLRRDRFVFVGW	11.44
Photosystem II D2 protein	Pepsin	18	FTKDENDLFDIMDDWLRRDRFVFVGWSGL	12.76
Photosystem II D2 protein	Pepsin	19	FTKDENDLFDIMDDWLRRDRFVFVGWSGLLLFPCAYFAL	17.16
Photosystem II D2 protein	Pepsin	20	DLFDIMDDWLRRDRFVFVGWSGLL	10.56
Photosystem II D2 protein	Pepsin	21	DLFDIMDDWLRRDRFVFVGWSGLLLFPCAYF	13.64
Photosystem II D2 protein	Pepsin	22	DLFDIMDDWLRRDRFVFVGWSGLLLFPCAYFALGGWF	16.28
Photosystem II D2 protein	Pepsin	23	LFDIMDDWLRRDRFVFVGWSGL	9.68
Photosystem II D2 protein	Pepsin	24	LFDIMDDWLRRDRFVFVGWSGLLLFPCAYFA	13.64
Photosystem II D2 protein	Pepsin	25	LFDIMDDWLRRDRFVFVGWSGLLLFPCAYFALGGW	15.4
Photosystem II D2 protein	Pepsin	26	FDIMDDWLRRDRFVFVGWSGLLLF	10.56
Photosystem II D2 protein	Pepsin	27	FDIMDDWLRRDRFVFVGWSGLLLFPCAYFALGG	14.52
Photosystem II D2 protein	Pepsin	28	FDIMDDWLRRDRFVFVGWSGLLLFPCAYFALGGWFTGTT	17.16
Photosystem II D2 protein	Pepsin	29	DWLRRDRFVFVGWSGLLLFPCA	9.68
Photosystem II D2 protein	Pepsin	30	DWLRRDRFVFVGWSGLLLFPCAYFAL	11.44
Photosystem II D2 protein	Pepsin	31	DWLRRDRFVFVGWSGLLLFPCAYFALGGWF	13.2
Photosystem II D2 protein	Pepsin	32	DWLRRDRFVFVGWSGLLLFPCAYFALGGWFTGTTFVTSW	17.16
Photosystem II D2 protein	Pepsin	33	WLRRDRFVFVGWSGLLLFPCAYF	10.12
Photosystem II D2 protein	Pepsin	34	WLRRDRFVFVGWSGLLLFPCAYFALGGWFTGTTF	14.96
Photosystem II D2 protein	Pepsin	35	WLRRDRFVFVGWSGLLLFPCAYFALGGWFTGTTFVTSWY	17.16
Photosystem II D2 protein	Pepsin	36	LRRDRFVFVGWSGLLLFPCAYFA	10.12
Photosystem II D2 protein	Pepsin	37	LRRDRFVFVGWSGLLLFPCAYFALGG	11.44
Photosystem II D2 protein	Pepsin	38	LRRDRFVFVGWSGLLLFPCAYFALGGWFTGTT	14.08
Photosystem II D2 protein	Pepsin	39	LRRDRFVFVGWSGLLLFPCAYFALGGWFTGTTFVTSW	16.28
Photosystem II D2 protein	Pepsin	40	FVFVGWSGLLLFPCAYFALGGW	9.68
Photosystem II D2 protein	Pepsin	41	FVFVGWSGLLLFPCAYFALGGWFTGTTFVTS	13.64
Photosystem II D2 protein	Pepsin	42	FVFVGWSGLLLFPCAYFALGGWFTGTTFVTSWYTHG	15.84
Photosystem II D2 protein	Pepsin	43	FVGWSGLLLFPCAYFALGGWF	9.24
Photosystem II D2 protein	Pepsin	44	FVGWSGLLLFPCAYFALGGWFTGTTFVTSWY	13.64
Photosystem II D2 protein	Pepsin	45	FVGWSGLLLFPCAYFALGGWFTGTTFVTSWYTHGLASSY	17.16
Photosystem II D2 protein	Pepsin	46	GWSGLLLFPCAYFALGGWFTGTT	10.12
Photosystem II D2 protein	Pepsin	47	GWSGLLLFPCAYFALGGWFTGTTFVTSWYTHG	14.08
Photosystem II D2 protein	Pepsin	48	GWSGLLLFPCAYFALGGWFTGTTFVTSWYTHGLASSYL	16.72
Photosystem II D2 protein	Pepsin	49	WSGLLLFPCAYFALGGWFTGTTF	10.12
Photosystem II D2 protein	Pepsin	50	WSGLLLFPCAYFALGGWFTGTTFVTSW	11.88
Photosystem II D2 protein	Pepsin	51	WSGLLLFPCAYFALGGWFTGTTFVTSWYTHGLASS	15.4
Photosystem II D2 protein	Pepsin	52	GLLLFPCAYFALGGWFTGTTFVTS	10.56
Photosystem II D2 protein	Pepsin	53	GLLLFPCAYFALGGWFTGTTFVTSWY	11.44
Photosystem II D2 protein	Pepsin	54	GLLLFPCAYFALGGWFTGTTFVTSWYTHGLASSYLEGCN	17.16
Photosystem II D2 protein	Pepsin	55	LLLFPCAYFALGGWFTGTTFVTSW	10.56
Photosystem II D2 protein	Pepsin	56	LLLFPCAYFALGGWFTGTTFVTSWYTHGLASSY	14.52
Photosystem II D2 protein	Pepsin	57	LLLFPCAYFALGGWFTGTTFVTSWYTHGLASSYLEGCNF	17.16
Photosystem II D2 protein	Pepsin	58	LLFPCAYFALGGWFTGTTFVTS	9.68
Photosystem II D2 protein	Pepsin	59	LLFPCAYFALGGWFTGTTFVTSWYTHG	11.88
Photosystem II D2 protein	Pepsin	60	LLFPCAYFALGGWFTGTTFVTSWYTHGLASSYLEGCNFL	17.16
Photosystem II D2 protein	Pepsin	61	FPCAYFALGGWFTGTTFVTSWY	9.68
Photosystem II D2 protein	Pepsin	62	FPCAYFALGGWFTGTTFVTSWYTHGLASSYLEGCN	15.4
Photosystem II D2 protein	Pepsin	63	AYFALGGWFTGTTFVTSWYTHGLASS	11.44
Photosystem II D2 protein	Pepsin	64	AYFALGGWFTGTTFVTSWYTHGLASSYLEGCN	14.08
Photosystem II D2 protein	Pepsin	65	YFALGGWFTGTTFVTSWYTHGLASSYL	11.88
Photosystem II D2 protein	Pepsin	66	YFALGGWFTGTTFVTSWYTHGLASSYLEGCNF	14.08
Photosystem II D2 protein	Pepsin	67	FALGGWFTGTTFVTSWYTHGLASSY	11
Photosystem II D2 protein	Pepsin	68	FALGGWFTGTTFVTSWYTHGLASSYLEGCNFL	14.08
Photosystem II D2 protein	Pepsin	69	ALGGWFTGTTFVTSWYTHGLASSYLEGCN	12.76
Photosystem II D2 protein	Pepsin	70	LGGWFTGTTFVTSWYTHGLASSYL	10.56
Photosystem II D2 protein	Pepsin	71	GWFTGTTFVTSWYTHGLASSYLEGCN	11.44
Photosystem II D2 protein	Pepsin	72	GWFTGTTFVTSWYTHGLASSYLEGCNFLTAAVSTPANSL	17.16
Photosystem II D2 protein	Pepsin	73	WFTGTTFVTSWYTHGLASSYLEGCNF	11.44
Photosystem II D2 protein	Pepsin	74	WFTGTTFVTSWYTHGLASSYLEGCNFLTAAVSTPANS	16.28
Photosystem II D2 protein	Pepsin	75	FTGTTFVTSWYTHGLASSYLEGCNFL	11.44
Photosystem II D2 protein	Pepsin	76	FTGTTFVTSWYTHGLASSYLEGCNFLTAAVSTPANSL	16.28
Photosystem II D2 protein	Pepsin	77	TFVTSWYTHGLASSYLEGCNFL	9.68
Photosystem II D2 protein	Pepsin	78	TFVTSWYTHGLASSYLEGCNFLTAAVSTPANSL	14.52
Photosystem II D2 protein	Pepsin	79	TFVTSWYTHGLASSYLEGCNFLTAAVSTPANSLAHSLLL	17.16
Photosystem II D2 protein	Pepsin	80	FVTSWYTHGLASSYLEGCNFLTAAVSTPANSLAHS	15.4
Photosystem II D2 protein	Pepsin	81	FVTSWYTHGLASSYLEGCNFLTAAVSTPANSLAHSLLLL	17.16
Photosystem II D2 protein	Pepsin	82	SWYTHGLASSYLEGCNFLTAAVSTPANS	12.32
Photosystem II D2 protein	Pepsin	83	SWYTHGLASSYLEGCNFLTAAVSTPANSLAHSLL	14.96
Photosystem II D2 protein	Pepsin	84	WYTHGLASSYLEGCNFLTAAVSTPANSL	12.32
Photosystem II D2 protein	Pepsin	85	WYTHGLASSYLEGCNFLTAAVSTPANSLAHSLLL	14.96
Photosystem II D2 protein	Pepsin	86	YTHGLASSYLEGCNFLTAAVSTPANS	11.44
Photosystem II D2 protein	Pepsin	87	YTHGLASSYLEGCNFLTAAVSTPANSLAHSLLLL	14.96
Photosystem II D2 protein	Pepsin	88	GLASSYLEGCNFLTAAVSTPANSLAHS	11.88
Photosystem II D2 protein	Pepsin	89	GLASSYLEGCNFLTAAVSTPANSLAHSLLLLWGPEAQGD	17.16
Photosystem II D2 protein	Pepsin	90	SYLEGCNFLTAAVSTPANSLAHSLL	11
Photosystem II D2 protein	Pepsin	91	SYLEGCNFLTAAVSTPANSLAHSLLLLWGPEAQGD	15.4
Photosystem II D2 protein	Pepsin	92	SYLEGCNFLTAAVSTPANSLAHSLLLLWGPEAQGDFTRW	17.16
Photosystem II D2 protein	Pepsin	93	YLEGCNFLTAAVSTPANSLAHS	9.68
Photosystem II D2 protein	Pepsin	94	YLEGCNFLTAAVSTPANSLAHSLLLL	11.44
Photosystem II D2 protein	Pepsin	95	YLEGCNFLTAAVSTPANSLAHSLLLLWGPEAQGDF	15.4
Photosystem II D2 protein	Pepsin	96	LEGCNFLTAAVSTPANSLAHSLL	10.12
Photosystem II D2 protein	Pepsin	97	LEGCNFLTAAVSTPANSLAHSLLLLWGPEAQGD	14.52
Photosystem II D2 protein	Pepsin	98	LEGCNFLTAAVSTPANSLAHSLLLLWGPEAQGDFTRWCQ	17.16
Photosystem II D2 protein	Pepsin	99	NFLTAAVSTPANSLAHSLLLLWGPEAQGD	12.76
Photosystem II D2 protein	Pepsin	100	NFLTAAVSTPANSLAHSLLLLWGPEAQGDF	13.2
Photosystem II D2 protein	Pepsin	101	NFLTAAVSTPANSLAHSLLLLWGPEAQGDFTRWCQL	15.84
Photosystem II D2 protein	Pepsin	102	NFLTAAVSTPANSLAHSLLLLWGPEAQGDFTRWCQLGGL	17.16
Photosystem II D2 protein	Pepsin	103	FLTAAVSTPANSLAHSLLLLWGPEAQGD	12.32
Photosystem II D2 protein	Pepsin	104	FLTAAVSTPANSLAHSLLLLWGPEAQGDFTRWCQ	14.96
Photosystem II D2 protein	Pepsin	105	FLTAAVSTPANSLAHSLLLLWGPEAQGDFTRWCQLGGLW	17.16
Photosystem II D2 protein	Pepsin	106	LTAAVSTPANSLAHSLLLLWGPEAQGDF	12.32
Photosystem II D2 protein	Pepsin	107	LTAAVSTPANSLAHSLLLLWGPEAQGDFTRW	13.64
Photosystem II D2 protein	Pepsin	108	LTAAVSTPANSLAHSLLLLWGPEAQGDFTRWCQLGG	15.84
Photosystem II D2 protein	Pepsin	109	LTAAVSTPANSLAHSLLLLWGPEAQGDFTRWCQLGGLWT	17.16
Photosystem II D2 protein	Pepsin	110	SLAHSLLLLWGPEAQGDFTRWCQL	10.56
Photosystem II D2 protein	Pepsin	111	SLAHSLLLLWGPEAQGDFTRWCQLGGLW	12.32
Photosystem II D2 protein	Pepsin	112	SLAHSLLLLWGPEAQGDFTRWCQLGGLWTFVA	14.08
Photosystem II D2 protein	Pepsin	113	SLAHSLLLLWGPEAQGDFTRWCQLGGLWTFVALHGAFGL	17.16
Photosystem II D2 protein	Pepsin	114	LAHSLLLLWGPEAQGDFTRWCQLGGL	11.44
Photosystem II D2 protein	Pepsin	115	LAHSLLLLWGPEAQGDFTRWCQLGGLWTF	12.76
Photosystem II D2 protein	Pepsin	116	LAHSLLLLWGPEAQGDFTRWCQLGGLWTFVALHGAFG	16.28
Photosystem II D2 protein	Pepsin	117	SLLLLWGPEAQGDFTRWCQLGG	9.68
Photosystem II D2 protein	Pepsin	118	SLLLLWGPEAQGDFTRWCQLGGLWT	11
Photosystem II D2 protein	Pepsin	119	SLLLLWGPEAQGDFTRWCQLGGLWTFVALHGAF	14.52
Photosystem II D2 protein	Pepsin	120	SLLLLWGPEAQGDFTRWCQLGGLWTFVALHGAFGLIGFM	17.16
Photosystem II D2 protein	Pepsin	121	LLLWGPEAQGDFTRWCQLGGL	9.24
Photosystem II D2 protein	Pepsin	122	LLLWGPEAQGDFTRWCQLGGLWTF	10.56
Photosystem II D2 protein	Pepsin	123	LLLWGPEAQGDFTRWCQLGGLWTFVALHGAF	13.64
Photosystem II D2 protein	Pepsin	124	LLLWGPEAQGDFTRWCQLGGLWTFVALHGAFGLIGFML	16.72
Photosystem II D2 protein	Pepsin	161	LLWGPEAQGDFTRWCQLGGLW	9.24
Photosystem II D2 protein	Pepsin	162	LLWGPEAQGDFTRWCQLGGLWTFVAL	11.44
Photosystem II D2 protein	Pepsin	163	LLWGPEAQGDFTRWCQLGGLWTFVALHGAFGLIG	14.96
Photosystem II D2 protein	Pepsin	164	LLWGPEAQGDFTRWCQLGGLWTFVALHGAFGLIGFMLRQ	17.16
Photosystem II D2 protein	Pepsin	165	LWGPEAQGDFTRWCQLGGLWTFVA	10.56
Photosystem II D2 protein	Pepsin	166	LWGPEAQGDFTRWCQLGGLWTFVALHGAFGL	13.64
Photosystem II D2 protein	Pepsin	167	LWGPEAQGDFTRWCQLGGLWTFVALHGAFGLIGFM	15.4
Photosystem II D2 protein	Pepsin	168	DFTRWCQLGGLWTFVALHGAF	9.24
Photosystem II D2 protein	Pepsin	169	DFTRWCQLGGLWTFVALHGAFGLIG	11
Photosystem II D2 protein	Pepsin	170	DFTRWCQLGGLWTFVALHGAFGLIGFML	12.32
Photosystem II D2 protein	Pepsin	171	DFTRWCQLGGLWTFVALHGAFGLIGFMLRQFELARSVQ	16.72
Photosystem II D2 protein	Pepsin	172	FTRWCQLGGLWTFVALHGAFGL	9.68
Photosystem II D2 protein	Pepsin	173	FTRWCQLGGLWTFVALHGAFGLIGFM	11.44
Photosystem II D2 protein	Pepsin	174	FTRWCQLGGLWTFVALHGAFGLIGFMLRQFEL	14.08
Photosystem II D2 protein	Pepsin	175	WCQLGGLWTFVALHGAFGLIGF	9.68
Photosystem II D2 protein	Pepsin	176	WCQLGGLWTFVALHGAFGLIGFMLRQFE	12.32
Photosystem II D2 protein	Pepsin	177	WCQLGGLWTFVALHGAFGLIGFMLRQFELARSVQLRP	16.28
Photosystem II D2 protein	Pepsin	178	QLGGLWTFVALHGAFGLIGFMLRQ	10.56
Photosystem II D2 protein	Pepsin	179	QLGGLWTFVALHGAFGLIGFMLRQFELARSVQ	14.08
Photosystem II D2 protein	Pepsin	180	LGGLWTFVALHGAFGLIGFML	9.24
Photosystem II D2 protein	Pepsin	181	LGGLWTFVALHGAFGLIGFMLRQFEL	11.44
Photosystem II D2 protein	Pepsin	182	LGGLWTFVALHGAFGLIGFMLRQFELARSVQLRPYNAIA	17.16
Photosystem II D2 protein	Pepsin	183	GLWTFVALHGAFGLIGFMLRQFE	10.12
Photosystem II D2 protein	Pepsin	184	GLWTFVALHGAFGLIGFMLRQFELARSVQLRP	14.08
Photosystem II D2 protein	Pepsin	185	GLWTFVALHGAFGLIGFMLRQFELARSVQLRPYNAIAF	16.72
Photosystem II D2 protein	Pepsin	186	LWTFVALHGAFGLIGFMLRQFEL	10.12
Photosystem II D2 protein	Pepsin	187	LWTFVALHGAFGLIGFMLRQFELARSVQ	12.32
Photosystem II D2 protein	Pepsin	188	LWTFVALHGAFGLIGFMLRQFELARSVQLRPYNAIA	15.84
Photosystem II D2 protein	Pepsin	189	WTFVALHGAFGLIGFMLRQFE	9.24
Photosystem II D2 protein	Pepsin	190	WTFVALHGAFGLIGFMLRQFELARSVQLRP	13.2
Photosystem II D2 protein	Pepsin	191	WTFVALHGAFGLIGFMLRQFELARSVQLRPYNAIAF	15.84
Photosystem II D2 protein	Pepsin	192	TFVALHGAFGLIGFMLRQFEL	9.24
Photosystem II D2 protein	Pepsin	193	TFVALHGAFGLIGFMLRQFELARSVQLRPYNAIA	14.96
Photosystem II D2 protein	Pepsin	194	FVALHGAFGLIGFMLRQFELARSVQ	11
Photosystem II D2 protein	Pepsin	195	FVALHGAFGLIGFMLRQFELARSVQLRPYNAIAF	14.96
Photosystem II D2 protein	Pepsin	196	ALHGAFGLIGFMLRQFELARSVQLRP	11.44
Photosystem II D2 protein	Pepsin	197	ALHGAFGLIGFMLRQFELARSVQLRPYNAIA	13.64
Photosystem II D2 protein	Pepsin	198	ALHGAFGLIGFMLRQFELARSVQLRPYNAIAFSGPIAVF	17.16
Photosystem II D2 protein	Pepsin	199	LHGAFGLIGFMLRQFELARSVQLRP	11
Photosystem II D2 protein	Pepsin	200	LHGAFGLIGFMLRQFELARSVQLRPYNAIAFSGPIAV	16.28
Photosystem II D2 protein	Pepsin	201	FGLIGFMLRQFELARSVQLRPYNAIA	11.44
Photosystem II D2 protein	Pepsin	202	FGLIGFMLRQFELARSVQLRPYNAIAFSGPIAV	14.52
Photosystem II D2 protein	Pepsin	203	FGLIGFMLRQFELARSVQLRPYNAIAFSGPIAVF	14.96
Photosystem II D2 protein	Pepsin	204	FGLIGFMLRQFELARSVQLRPYNAIAFSGPIAVFVSVFL	17.16
Photosystem II D2 protein	Pepsin	205	GLIGFMLRQFELARSVQLRPYNAIA	11
Photosystem II D2 protein	Pepsin	206	GLIGFMLRQFELARSVQLRPYNAIAFSGPIAVFVSVF	16.28
Photosystem II D2 protein	Pepsin	207	LIGFMLRQFELARSVQLRPYNAIA	10.56
Photosystem II D2 protein	Pepsin	208	LIGFMLRQFELARSVQLRPYNAIAFSGPIAV	13.64
Photosystem II D2 protein	Pepsin	209	LIGFMLRQFELARSVQLRPYNAIAFSGPIAVFVSVFLIY	17.16
Photosystem II D2 protein	Pepsin	210	GFMLRQFELARSVQLRPYNAIAF	10.12
Photosystem II D2 protein	Pepsin	211	GFMLRQFELARSVQLRPYNAIAFSGPIAVF	13.2
Photosystem II D2 protein	Pepsin	212	GFMLRQFELARSVQLRPYNAIAFSGPIAVFVSVFLIYP	16.72
Photosystem II D2 protein	Pepsin	213	FMLRQFELARSVQLRPYNAIA	9.24
Photosystem II D2 protein	Pepsin	214	FMLRQFELARSVQLRPYNAIAFSGPIAV	12.32
Photosystem II D2 protein	Pepsin	215	FMLRQFELARSVQLRPYNAIAFSGPIAVFVSVFLIY	15.84
Photosystem II D2 protein	Pepsin	216	MLRQFELARSVQLRPYNAIAFSGPIAVFVSV	13.64
Photosystem II D2 protein	Pepsin	217	MLRQFELARSVQLRPYNAIAFSGPIAVFVSVFLIYP	15.84
Photosystem II D2 protein	Pepsin	218	LRQFELARSVQLRPYNAIAFSGPIAVF	11.88
Photosystem II D2 protein	Pepsin	219	LRQFELARSVQLRPYNAIAFSGPIAVFVSVFL	14.08
Photosystem II D2 protein	Pepsin	220	QFELARSVQLRPYNAIAFSGPIAV	10.56
Photosystem II D2 protein	Pepsin	221	QFELARSVQLRPYNAIAFSGPIAVFVSVFLIY	14.08
Photosystem II D2 protein	Pepsin	222	QFELARSVQLRPYNAIAFSGPIAVFVSVFLIYPLGQSGW	17.16
Photosystem II D2 protein	Pepsin	223	ELARSVQLRPYNAIAFSGPIAVFVSV	11.44
Photosystem II D2 protein	Pepsin	224	ELARSVQLRPYNAIAFSGPIAVFVSVFLIYP	13.64
Photosystem II D2 protein	Pepsin	225	ELARSVQLRPYNAIAFSGPIAVFVSVFLIYPLGQSGWF	16.72
Photosystem II D2 protein	Pepsin	226	LARSVQLRPYNAIAFSGPIAV	9.24
Photosystem II D2 protein	Pepsin	227	LARSVQLRPYNAIAFSGPIAVFVSVFL	11.88
Photosystem II D2 protein	Pepsin	228	LARSVQLRPYNAIAFSGPIAVFVSVFLIYPLGQSG	15.4
Photosystem II D2 protein	Pepsin	229	QLRPYNAIAFSGPIAVFVSVF	9.24
Photosystem II D2 protein	Pepsin	230	QLRPYNAIAFSGPIAVFVSVFLIYP	11
Photosystem II D2 protein	Pepsin	231	QLRPYNAIAFSGPIAVFVSVFLIYPLGQSGWFFAPSF	16.28
Photosystem II D2 protein	Pepsin	232	PYNAIAFSGPIAVFVSVFLIY	9.24
Photosystem II D2 protein	Pepsin	233	PYNAIAFSGPIAVFVSVFLIYPLGQSGW	12.32
Photosystem II D2 protein	Pepsin	234	PYNAIAFSGPIAVFVSVFLIYPLGQSGWFFAPSFGVAAI	17.16
Photosystem II D2 protein	Pepsin	235	AFSGPIAVFVSVFLIYPLGQSG	9.68
Photosystem II D2 protein	Pepsin	236	AFSGPIAVFVSVFLIYPLGQSGWF	10.56
Photosystem II D2 protein	Pepsin	237	AFSGPIAVFVSVFLIYPLGQSGWFFAPSFGVAAIF	15.4
Photosystem II D2 protein	Pepsin	238	AFSGPIAVFVSVFLIYPLGQSGWFFAPSFGVAAIFRFIL	17.16
Photosystem II D2 protein	Pepsin	239	FSGPIAVFVSVFLIYPLGQSGW	9.68
Photosystem II D2 protein	Pepsin	240	FSGPIAVFVSVFLIYPLGQSGWFFAPSFGVAAIF	14.96
Photosystem II D2 protein	Pepsin	241	FSGPIAVFVSVFLIYPLGQSGWFFAPSFGVAAIFRFILF	17.16
Photosystem II D2 protein	Pepsin	242	VFVSVFLIYPLGQSGWFFAPSF	9.68
Photosystem II D2 protein	Pepsin	243	VFVSVFLIYPLGQSGWFFAPSFGVAAIFRF	13.2
Photosystem II D2 protein	Pepsin	244	VFVSVFLIYPLGQSGWFFAPSFGVAAIFRFILFF	14.96
Photosystem II D2 protein	Pepsin	245	VFVSVFLIYPLGQSGWFFAPSFGVAAIFRFILFFQGFHN	17.16
Photosystem II D2 protein	Pepsin	246	FVSVFLIYPLGQSGWFFAPSFGVAAI	11.44
Photosystem II D2 protein	Pepsin	247	FVSVFLIYPLGQSGWFFAPSFGVAAIFRFIL	13.64
Photosystem II D2 protein	Pepsin	248	FVSVFLIYPLGQSGWFFAPSFGVAAIFRFILFFQGF	15.84
Photosystem II D2 protein	Pepsin	249	VFLIYPLGQSGWFFAPSFGVAAIF	10.56
Photosystem II D2 protein	Pepsin	250	VFLIYPLGQSGWFFAPSFGVAAIFRFILFFQG	14.08
Photosystem II D2 protein	Pepsin	251	VFLIYPLGQSGWFFAPSFGVAAIFRFILFFQGFHNWT	16.28
Photosystem II D2 protein	Pepsin	252	FLIYPLGQSGWFFAPSFGVAAI	9.68
Photosystem II D2 protein	Pepsin	253	FLIYPLGQSGWFFAPSFGVAAIFRFILF	12.32
Photosystem II D2 protein	Pepsin	254	FLIYPLGQSGWFFAPSFGVAAIFRFILFFQGF	14.08
Photosystem II D2 protein	Pepsin	255	FLIYPLGQSGWFFAPSFGVAAIFRFILFFQGFHNWTLNP	17.16
Photosystem II D2 protein	Pepsin	256	LIYPLGQSGWFFAPSFGVAAIF	9.68
Photosystem II D2 protein	Pepsin	257	LIYPLGQSGWFFAPSFGVAAIFRFILFF	12.32
Photosystem II D2 protein	Pepsin	258	LIYPLGQSGWFFAPSFGVAAIFRFILFFQGFHNWT	15.4
Photosystem II D2 protein	Pepsin	259	YPLGQSGWFFAPSFGVAAIFRFIL	10.56
Photosystem II D2 protein	Pepsin	260	YPLGQSGWFFAPSFGVAAIFRFILFFQG	12.32
Photosystem II D2 protein	Pepsin	261	YPLGQSGWFFAPSFGVAAIFRFILFFQGFHNWTLNP	15.84
Photosystem II D2 protein	Pepsin	262	PLGQSGWFFAPSFGVAAIFRF	9.24
Photosystem II D2 protein	Pepsin	263	PLGQSGWFFAPSFGVAAIFRFILFF	11
Photosystem II D2 protein	Pepsin	264	PLGQSGWFFAPSFGVAAIFRFILFFQGFHNWT	14.08
Photosystem II D2 protein	Pepsin	265	GWFFAPSFGVAAIFRFILFFQGF	10.12
Photosystem II D2 protein	Pepsin	266	GWFFAPSFGVAAIFRFILFFQGFHNWTLNP	13.2
Photosystem II D2 protein	Pepsin	267	GWFFAPSFGVAAIFRFILFFQGFHNWTLNPFHMMGVAGV	17.16
Photosystem II D2 protein	Pepsin	268	WFFAPSFGVAAIFRFILFFQG	9.24
Photosystem II D2 protein	Pepsin	269	WFFAPSFGVAAIFRFILFFQGFHNWT	11.44
Photosystem II D2 protein	Pepsin	270	WFFAPSFGVAAIFRFILFFQGFHNWTLNPFHMMGVAGVL	17.16
Photosystem II D2 protein	Pepsin	271	FFAPSFGVAAIFRFILFFQGF	9.24
Photosystem II D2 protein	Pepsin	272	FFAPSFGVAAIFRFILFFQGFHNWTLNP	12.32
Photosystem II D2 protein	Pepsin	273	FFAPSFGVAAIFRFILFFQGFHNWTLNPFHMMGVAGV	16.28
Photosystem II D2 protein	Pepsin	274	FGVAAIFRFILFFQGFHNWTLNP	10.12
Photosystem II D2 protein	Pepsin	275	FGVAAIFRFILFFQGFHNWTLNPFHMMGVAGVL	14.52
Photosystem II D2 protein	Pepsin	276	FGVAAIFRFILFFQGFHNWTLNPFHMMGVAGVLGAALL	16.72
Photosystem II D2 protein	Pepsin	277	IFRFILFFQGFHNWTLNPFHMMGVAGV	11.88
Photosystem II D2 protein	Pepsin	278	IFRFILFFQGFHNWTLNPFHMMGVAGVLGAAL	14.08
Photosystem II D2 protein	Pepsin	279	FRFILFFQGFHNWTLNPFHMMGVAGVL	11.88
Photosystem II D2 protein	Pepsin	280	FRFILFFQGFHNWTLNPFHMMGVAGVLGAA	13.2
Photosystem II D2 protein	Pepsin	281	FILFFQGFHNWTLNPFHMMGVAGV	10.56
Photosystem II D2 protein	Pepsin	282	FILFFQGFHNWTLNPFHMMGVAGVLGAALL	13.2
Photosystem II D2 protein	Pepsin	283	LFFQGFHNWTLNPFHMMGVAGVLGAAL	11.88
Photosystem II D2 protein	Pepsin	284	LFFQGFHNWTLNPFHMMGVAGVLGAALLCAIHGATVENT	17.16
Photosystem II D2 protein	Pepsin	285	FFQGFHNWTLNPFHMMGVAGVL	9.68
Photosystem II D2 protein	Pepsin	286	FFQGFHNWTLNPFHMMGVAGVLGAA	11
Photosystem II D2 protein	Pepsin	287	FFQGFHNWTLNPFHMMGVAGVLGAALLCAIHGATVENTL	17.16
Photosystem II D2 protein	Pepsin	288	FQGFHNWTLNPFHMMGVAGVL	9.24
Photosystem II D2 protein	Pepsin	289	FQGFHNWTLNPFHMMGVAGVLGAALL	11.44
Photosystem II D2 protein	Pepsin	290	FQGFHNWTLNPFHMMGVAGVLGAALLCAIHGATVENTLF	17.16
Photosystem II D2 protein	Pepsin	291	GFHNWTLNPFHMMGVAGVLGAAL	10.12
Photosystem II D2 protein	Pepsin	292	GFHNWTLNPFHMMGVAGVLGAALLCAIHGATVENTL	15.84
Photosystem II D2 protein	Pepsin	293	FHNWTLNPFHMMGVAGVLGAA	9.24
Photosystem II D2 protein	Pepsin	294	FHNWTLNPFHMMGVAGVLGAALLCAIHGATVENTLF	15.84
Photosystem II D2 protein	Pepsin	295	NWTLNPFHMMGVAGVLGAALLCAIHGATVENT	14.08
Photosystem II D2 protein	Pepsin	296	TLNPFHMMGVAGVLGAALLCAIHGATVENTL	13.64
Photosystem II D2 protein	Pepsin	297	PFHMMGVAGVLGAALLCAIHGATVENTLF	12.76
Photosystem II D2 protein	Pepsin	298	PFHMMGVAGVLGAALLCAIHGATVENTLFEDGDGANTF	16.72
Photosystem II D2 protein	Pepsin	299	VLGAALLCAIHGATVENTLFEDGDGANT	12.32
Photosystem II D2 protein	Pepsin	300	VLGAALLCAIHGATVENTLFEDGDGANTFRA	13.64
Photosystem II D2 protein	Pepsin	301	LGAALLCAIHGATVENTLFEDGDGANTF	12.32
Photosystem II D2 protein	Pepsin	302	LGAALLCAIHGATVENTLFEDGDGANTFRAFNPTQAEET	17.16
Photosystem II D2 protein	Pepsin	303	ALLCAIHGATVENTLFEDGDGANTFRA	11.88
Photosystem II D2 protein	Pepsin	304	ALLCAIHGATVENTLFEDGDGANTFRAFNPTQAEETY	16.28
Photosystem II D2 protein	Pepsin	305	LLCAIHGATVENTLFEDGDGANT	10.12
Photosystem II D2 protein	Pepsin	306	LLCAIHGATVENTLFEDGDGANTFRAFNPTQAEET	15.4
Photosystem II D2 protein	Pepsin	307	LCAIHGATVENTLFEDGDGANTF	10.12
Photosystem II D2 protein	Pepsin	308	LCAIHGATVENTLFEDGDGANTFRAFNPTQAEETY	15.4
Photosystem II D2 protein	Pepsin	309	TLFEDGDGANTFRAFNPTQAEET	10.12
Photosystem II D2 protein	Pepsin	310	TLFEDGDGANTFRAFNPTQAEETYSMVTANRFWSQIF	16.28
Photosystem II D2 protein	Pepsin	311	LFEDGDGANTFRAFNPTQAEETY	10.12
Photosystem II D2 protein	Pepsin	312	LFEDGDGANTFRAFNPTQAEETYSMVTANRF	13.64
Photosystem II D2 protein	Pepsin	313	LFEDGDGANTFRAFNPTQAEETYSMVTANRFWSQIFGVA	17.16
Photosystem II D2 protein	Pepsin	314	FEDGDGANTFRAFNPTQAEET	9.24
Photosystem II D2 protein	Pepsin	315	FEDGDGANTFRAFNPTQAEETYSMVTANRFWSQI	14.96
Photosystem II D2 protein	Pepsin	316	FEDGDGANTFRAFNPTQAEETYSMVTANRFWSQIFGVAF	17.16
Photosystem II D2 protein	Pepsin	317	TFRAFNPTQAEETYSMVTANRF	9.68
Photosystem II D2 protein	Pepsin	318	TFRAFNPTQAEETYSMVTANRFWSQIFGVA	13.2
Photosystem II D2 protein	Pepsin	319	TFRAFNPTQAEETYSMVTANRFWSQIFGVAFSNKRWLHF	17.16
Photosystem II D2 protein	Pepsin	320	FRAFNPTQAEETYSMVTANRFWSQIF	11.44
Photosystem II D2 protein	Pepsin	321	FRAFNPTQAEETYSMVTANRFWSQIFGVAF	13.2
Photosystem II D2 protein	Pepsin	322	FRAFNPTQAEETYSMVTANRFWSQIFGVAFSNKRWLH	16.28
Photosystem II D2 protein	Pepsin	323	AFNPTQAEETYSMVTANRFWSQI	10.12
Photosystem II D2 protein	Pepsin	324	AFNPTQAEETYSMVTANRFWSQIFGVA	11.88
Photosystem II D2 protein	Pepsin	325	AFNPTQAEETYSMVTANRFWSQIFGVAFSNKRWLHFFML	17.16
Photosystem II D2 protein	Pepsin	326	TYSMVTANRFWSQIFGVAFSNKRWLHF	11.88
Photosystem II D2 protein	Pepsin	327	TYSMVTANRFWSQIFGVAFSNKRWLHFFM	12.76
Photosystem II D2 protein	Pepsin	328	TYSMVTANRFWSQIFGVAFSNKRWLHFFMLFVPVTGLW	16.72
Photosystem II D2 protein	Pepsin	329	YSMVTANRFWSQIFGVAFSNKRWLH	11
Photosystem II D2 protein	Pepsin	330	YSMVTANRFWSQIFGVAFSNKRWLHFFML	12.76
Photosystem II D2 protein	Pepsin	331	YSMVTANRFWSQIFGVAFSNKRWLHFFMLFVPVTGL	15.84
Photosystem II D2 protein	Pepsin	332	FWSQIFGVAFSNKRWLHFFML	9.24
Photosystem II D2 protein	Pepsin	333	FWSQIFGVAFSNKRWLHFFMLFVPVTGLW	12.76
Photosystem II D2 protein	Pepsin	334	FWSQIFGVAFSNKRWLHFFMLFVPVTGLWMSAL	14.52
Photosystem II D2 protein	Pepsin	335	FWSQIFGVAFSNKRWLHFFMLFVPVTGLWMSALGVVGLA	17.16
Photosystem II D2 protein	Pepsin	336	IFGVAFSNKRWLHFFMLFVPVTG	10.12
Photosystem II D2 protein	Pepsin	337	IFGVAFSNKRWLHFFMLFVPVTGLWMSA	12.32
Photosystem II D2 protein	Pepsin	338	IFGVAFSNKRWLHFFMLFVPVTGLWMSALGVVG	14.52
Photosystem II D2 protein	Pepsin	339	IFGVAFSNKRWLHFFMLFVPVTGLWMSALGVVGLALNL	16.72
Photosystem II D2 protein	Pepsin	340	FGVAFSNKRWLHFFMLFVPVTGL	10.12
Photosystem II D2 protein	Pepsin	341	FGVAFSNKRWLHFFMLFVPVTGLWMSAL	12.32
Photosystem II D2 protein	Pepsin	342	FGVAFSNKRWLHFFMLFVPVTGLWMSALGVVGLAL	15.4
Photosystem II D2 protein	Pepsin	343	FGVAFSNKRWLHFFMLFVPVTGLWMSALGVVGLALNLRA	17.16
Photosystem II D2 protein	Pepsin	344	AFSNKRWLHFFMLFVPVTGLW	9.24
Photosystem II D2 protein	Pepsin	345	AFSNKRWLHFFMLFVPVTGLWMSALGVVG	12.76
Photosystem II D2 protein	Pepsin	346	AFSNKRWLHFFMLFVPVTGLWMSALGVVGLALN	14.52
Photosystem II D2 protein	Pepsin	347	AFSNKRWLHFFMLFVPVTGLWMSALGVVGLALNLRAYDF	17.16
Photosystem II D2 protein	Pepsin	348	FSNKRWLHFFMLFVPVTGLWMSA	10.12
Photosystem II D2 protein	Pepsin	349	FSNKRWLHFFMLFVPVTGLWMSALGVVGLA	13.2
Photosystem II D2 protein	Pepsin	350	FSNKRWLHFFMLFVPVTGLWMSALGVVGLALNL	14.52
Photosystem II D2 protein	Pepsin	351	FSNKRWLHFFMLFVPVTGLWMSALGVVGLALNLRAYD	16.28
Photosystem II D2 protein	Pepsin	352	HFFMLFVPVTGLWMSALGVVGL	9.68
Photosystem II D2 protein	Pepsin	353	HFFMLFVPVTGLWMSALGVVGLALN	11
Photosystem II D2 protein	Pepsin	354	HFFMLFVPVTGLWMSALGVVGLALNLRAYDF	13.64
Photosystem II D2 protein	Pepsin	355	FFMLFVPVTGLWMSALGVVGLAL	10.12
Photosystem II D2 protein	Pepsin	356	FFMLFVPVTGLWMSALGVVGLALNLRAYD	12.76
Photosystem II D2 protein	Pepsin	357	MLFVPVTGLWMSALGVVGLALNL	10.12
Photosystem II D2 protein	Pepsin	358	MLFVPVTGLWMSALGVVGLALNLRAYDF	12.32
Photosystem II D2 protein	Pepsin	359	LFVPVTGLWMSALGVVGLALNLRA	10.56
Photosystem II D2 protein	Pepsin	360	GLWMSALGVVGLALNLRAYDF	9.24
Photosystem II D2 protein	Pepsin	361	GLWMSALGVVGLALNLRAYDFVSQEIRAAEDPEFETFY	16.72
Photosystem II D2 protein	Pepsin	362	LWMSALGVVGLALNLRAYDFVSQEIRAAEDPEF	14.52
Photosystem II D2 protein	Pepsin	363	LWMSALGVVGLALNLRAYDFVSQEIRAAEDPEFETF	15.84
Photosystem II D2 protein	Pepsin	364	WMSALGVVGLALNLRAYDFVSQEIRAAEDPEFET	14.96
Photosystem II D2 protein	Pepsin	365	ALGVVGLALNLRAYDFVSQEIRAAEDPEF	12.76
Photosystem II D2 protein	Pepsin	366	ALGVVGLALNLRAYDFVSQEIRAAEDPEFETFYTKNILL	17.16
Photosystem II D2 protein	Pepsin	367	LGVVGLALNLRAYDFVSQEIRAAEDPEFETFY	14.08
Photosystem II D2 protein	Pepsin	368	LGVVGLALNLRAYDFVSQEIRAAEDPEFETFYTKNIL	16.28
Photosystem II D2 protein	Pepsin	369	GLALNLRAYDFVSQEIRAAEDPEF	10.56
Photosystem II D2 protein	Pepsin	370	GLALNLRAYDFVSQEIRAAEDPEFET	11.44
Photosystem II D2 protein	Pepsin	371	GLALNLRAYDFVSQEIRAAEDPEFETFYTKNILL	14.96
Photosystem II D2 protein	Pepsin	372	LALNLRAYDFVSQEIRAAEDPEF	10.12
Photosystem II D2 protein	Pepsin	373	LALNLRAYDFVSQEIRAAEDPEFETFY	11.88
Photosystem II D2 protein	Pepsin	374	LALNLRAYDFVSQEIRAAEDPEFETFYTKNILLNEGIRA	17.16
Photosystem II D2 protein	Pepsin	375	ALNLRAYDFVSQEIRAAEDPEFET	10.56
Photosystem II D2 protein	Pepsin	376	ALNLRAYDFVSQEIRAAEDPEFETFYTKNIL	13.64
Photosystem II D2 protein	Pepsin	377	LNLRAYDFVSQEIRAAEDPEF	9.24
Photosystem II D2 protein	Pepsin	378	LNLRAYDFVSQEIRAAEDPEFETFY	11
Photosystem II D2 protein	Pepsin	379	LNLRAYDFVSQEIRAAEDPEFETFYTKNILLNEGIRA	16.28
Photosystem II D2 protein	Pepsin	380	NLRAYDFVSQEIRAAEDPEFET	9.68
Photosystem II D2 protein	Pepsin	381	NLRAYDFVSQEIRAAEDPEFETFYTKNILL	13.2
Photosystem II D2 protein	Pepsin	382	LRAYDFVSQEIRAAEDPEFETFY	10.12
Photosystem II D2 protein	Pepsin	383	LRAYDFVSQEIRAAEDPEFETFYTKNILLNEGIRA	15.4
Photosystem II D2 protein	Pepsin	384	AYDFVSQEIRAAEDPEFETFYTKNIL	11.44
Photosystem II D2 protein	Pepsin	385	DFVSQEIRAAEDPEFETFYTKNILLNEGIRA	13.64
Photosystem II D2 protein	Pepsin	386	FVSQEIRAAEDPEFETFYTKNILL	10.56
Photosystem II D2 protein	Pepsin	387	FETFYTKNILLNEGIRAWMAAQDQPHENL	12.76
Photosystem II D2 protein	Pepsin	388	FETFYTKNILLNEGIRAWMAAQDQPHENLIFPEEVL	15.84
Photosystem II D2 protein	Pepsin	389	TFYTKNILLNEGIRAWMAAQDQPHENLIF	12.76
Photosystem II D2 protein	Pepsin	390	TFYTKNILLNEGIRAWMAAQDQPHENLIFPEEVLPRGNA	17.16
Photosystem II D2 protein	Pepsin	391	FYTKNILLNEGIRAWMAAQDQPHENL	11.44
Photosystem II D2 protein	Pepsin	392	FYTKNILLNEGIRAWMAAQDQPHENLIFPEEVLPRGNAL	17.16
Photosystem II D2 protein	Pepsin	393	YTKNILLNEGIRAWMAAQDQPHENLIF	11.88
Photosystem II D2 protein	Pepsin	394	YTKNILLNEGIRAWMAAQDQPHENLIFPEEVLPRGNA	16.28
Photosystem II D2 protein	Pepsin	395	LLNEGIRAWMAAQDQPHENLIFPEEVL	11.88
Photosystem II D2 protein	Pepsin	396	LLNEGIRAWMAAQDQPHENLIFPEEVLPRGNAL	14.52
Photosystem II D2 protein	Pepsin	397	LNEGIRAWMAAQDQPHENLIF	9.24
Photosystem II D2 protein	Pepsin	398	LNEGIRAWMAAQDQPHENLIFPEEVLPRGNA	13.64
Photosystem II D2 protein	Pepsin	399	AWMAAQDQPHENLIFPEEVLPRGNAL	11.44

## Sheet: Data summary
Protein	aa	Molecular weight		pI			Ext. coefficient	Abs 0.1% (=1 g/l)	Ext. coefficient	Abs 0.1% (=1 g/l)	Instability	Aliphatic index	Grand average of hydropathicity	N° of peptides generate		Media of energy produced (kcal)
		(Da)	(KDa)	Expasy	Protein-sol	Prom pI	In water						(GRAVY)	20-29 aa	30-39 aa	20-29 aa	30-39 aa
ATPase subunit I	184	20971.84	20.97	6.75	7.91	7.33	11585	0.552	11460	0.546	32.10	91.14	-0.342	89	99	10,99±1,14	15,26±1,32
F-ATPase subunit beta	498	53663.64	53.66	5.36	5.39	5375	17880	0.333	17880	0.333	35.82	97.69	-0.026	167	185	10,97±1,16	15,36±1,34
Endopeptidase Clp	195	21847.27	21.84	4.70	4.67	4685	26930	1233	26930	1233	32.97	101.38	0.157	59	67	11,04±1,21	15,32±1,23
PSII D2 protein	353	39549.48	39.54	5.33	5.42	5375	83670	2116	83420	2109	39.66	89.60	0.359	186	193	10,93±1,21	15,48±1,38
RuBisCO large subunit	475	52656.77	52.65	6.13	6.41	6.27	72810	1383	72310	1373	39.83	79.92	-0.289	175	182	10,98±1,32	15,27±1,33
Peptides
ATPase subunit I - E1C1	35	3954.51	3.95	6.32	7.5	6.91	0	0.000	0	0.000	54.63	111.43	-0.640
F-ATPase subunit beta - E1C20	36	3884.44	3.88	9.5	11.55	10525	0	0.000	0	0.000	11.58	91.94	-0.267
Endopeptidase Clp - E2C30	39	4366.08	4.36	3.71	3.45	3.58	9970	2284	-	-	27.36	112.31	0.477
PSII D2 - E1C11	40	4654.56	4.65	8.75	10.77	9.76	12490	2683	-	-	73.95	121.75	0.840
RuBisCO large subunit - E2C126	39	4656.19	4.65	8.15	9.71	8.93	8480	1821	8480	1821	49.53	50.00	-0.967

## Sheet: Stadistical
Statistical Parameters
Mean	13.24
Standard Deviation	2.54
Median	13.2
Minimum Energy	7.92
Maximum Energy	17.6
Interquartile Range (IQR)	4.4
Variance	6.43
Quartiles
0	7.92
0.25	11
0.5	13.2
0.75	15.4
Shapiro-Wilk test
W Statistic	0.94
p-value	< 2,2e-16
Anderson-Darling test
A Statistic	20.64
p-value	< 2,2e-16
